# Supplementary material for: A facile access to substituted cationic 12-azapyrene salts by rhodium(iii)-catalyzed C–H annulation of N-arylpyridinium salts
Source: Royal Society of Chemistry journal article supplement (doi:10.1039/c6ra15464f), 2016-01-01

*Supporting Information*

**A Facile Access to Substituted Cationic 12-Azapyrene Salts  
by Rhodium(III)-Catalyzed C–H Annulation of *N*-  
Arylpyridinium Salts**

*Boya Feng, Danyang Wan, Lipeng Yan, Vilas D. Kadam, Jingsong You and Ge Gao\**

*Key Laboratory of Green Chemistry and Technology of Ministry of Education,*

*College of Chemistry, Sichuan University,*

*29 Wangjiang Road, Chengdu 610064, P. R. China*

*E-mail: gg2b@scu.edu.cn*

## Table of Contents

|                                                                                                    |            |
|----------------------------------------------------------------------------------------------------|------------|
| <b>I. General remarks.....</b>                                                                     | <b>S1</b>  |
| <b>II. General procedure for the synthesis of <i>N</i>-arylpuridinium salts.....</b>               | <b>S1</b>  |
| <b>III. Optimization of the reaction conditions.....</b>                                           | <b>S2</b>  |
| <b>IV. General procedure for the synthesis of 12-azapyrene derivatives.....</b>                    | <b>S2</b>  |
| <b>V. H/D Exchange experiments.....</b>                                                            | <b>S3</b>  |
| <b>VI. Experimental data for the described substances.....</b>                                     | <b>S6</b>  |
| <b>VII. Photophysical spectra of 12-azapyrene derivatives in CH<sub>2</sub>Cl<sub>2</sub>.....</b> | <b>S18</b> |
| <b>VIII. Single crystal X-Ray structure.....</b>                                                   | <b>S21</b> |
| <b>XI. References.....</b>                                                                         | <b>S21</b> |

## I. General remarks

Unless otherwise noted, all reagents were prepared from commercial suppliers and used without further purification. Alkynes<sup>1</sup> and  $[\text{Cp}^*\text{RhCl}_2]_2$ <sup>2</sup> were prepared according to the literature procedure. DCE, MeCN, DMF, DMSO were dried by refluxing over  $\text{CaH}_2$  and freshly distilled prior to use. Toluene and 1,4-dioxane were dried by refluxing over sodium and freshly distilled prior to use. NMR spectra were recorded on a Bruker AV II-400 MHz or Agilent 400-MR DD2 spectrometer ( $^1\text{H}$  NMR at 400 MHz,  $^{13}\text{C}$  NMR at 100 MHz and  $^{19}\text{F}$  at 376 MHz). The  $^1\text{H}$  NMR (400 MHz) chemical shifts and the  $^{13}\text{C}$  NMR (100 MHz) chemical shifts were measured relative to  $\text{CDCl}_3$  or  $\text{DMSO-}d_6$  as the internal reference ( $\text{CDCl}_3$ :  $\delta_{\text{H}} = 7.26$  ppm,  $\delta_{\text{C}} = 77.16$  ppm;  $\text{DMSO-}d_6$ :  $\delta_{\text{H}} = 2.50$  ppm,  $\delta_{\text{C}} = 39.52$  ppm). High resolution mass spectra (HRMS) were recorded on a Waters-Q-TOF-Premier (ESI) or a Shimadzu LCMS-IT-TOF (ESI). UV/vis spectra were measured on a HITACHI U-2910. Fluorescence spectra were collected on a Horiba Jobin Yvon-Edison Fluoromax-4 fluorescence spectrometer with a calibrated integrating sphere system.

## II. General procedure for the synthesis of *N*-arylpyridinium salts

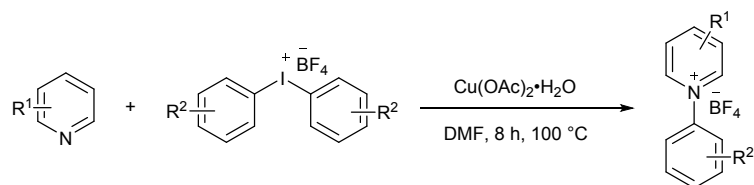

The *N*-arylpyridinium salts were synthesized from a modified procedure of our previous report.<sup>3</sup> To a 25 mL round bottom flask, a substituted pyridine (2 mmol), a diaryliodonium tetrafluoroborate (3 mmol, 1.5 equiv), copper acetate monohydrate (10 mol%, 0.2 mmol) and DMF (8 ml) were added. The reaction mixture was then heated at  $100\text{ }^\circ\text{C}$  for 8 hours. After cooled down to room temperature, DMF was removed under vacuum. The mixture was dissolved in methanol and precipitated using ethyl ether to give the pure product suitable for analysis.

### III. Optimization of the reaction conditions

**Table S1** Optimization of the reaction conditions.<sup>a</sup>

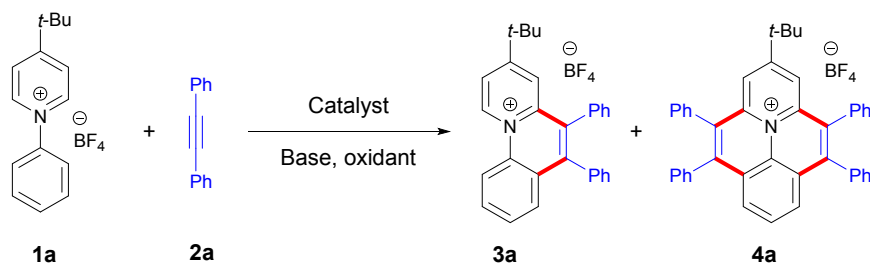

| Entry | Catalyst (5 mol %)                                           | Oxidant (equiv)           | Base (equiv) | Solvent | Yield <sup>b</sup> of <b>3a</b> | Yield <sup>b</sup> of <b>4a</b> |
|-------|--------------------------------------------------------------|---------------------------|--------------|---------|---------------------------------|---------------------------------|
| 1     | [Cp*RhCl <sub>2</sub> ] <sub>2</sub>                         | AgBF <sub>4</sub> (2)     | NaOAc(2)     | DCE     | Trace                           | n.d.                            |
| 2     | [Cp*Rh(MeCN) <sub>3</sub> (SbF <sub>6</sub> ) <sub>2</sub> ] | Cu(OAc) <sub>2</sub> (4)  | NaOAc(4)     | DCE     | n.d.                            | 88 %                            |
| 3     | [Cp*RhCl <sub>2</sub> ] <sub>2</sub>                         | Cu(acac) <sub>2</sub> (4) | NaOAc(4)     | DCE     | n.d.                            | n.d.                            |
| 4     | [Cp*RhCl <sub>2</sub> ] <sub>2</sub>                         | CuO(4)                    | NaOAc(4)     | DCE     | n.d.                            | n.d.                            |
| 5     | [Cp*RhCl <sub>2</sub> ] <sub>2</sub>                         | Cu(OAc) <sub>2</sub> (4)  | -            | DCE     | n.d.                            | n.d.                            |
| 6     | [Cp*RhCl <sub>2</sub> ] <sub>2</sub>                         | -                         | NaOAc(4)     | DCE     | n.d.                            | n.d.                            |
| 7     | -                                                            | Cu(OAc) <sub>2</sub> (4)  | NaOAc(4)     | DCE     | n.d.                            | n.d.                            |
| 8     | [Cp*RhCl <sub>2</sub> ] <sub>2</sub>                         | Cu(OAc) <sub>2</sub> (4)  | NaOAc(4)     | DMF     | n.d.                            | n.d.                            |
| 9     | [Cp*RhCl <sub>2</sub> ] <sub>2</sub>                         | Cu(OAc) <sub>2</sub> (4)  | NaOAc(4)     | DMSO    | n.d.                            | n.d.                            |
| 10    | [Cp*RhCl <sub>2</sub> ] <sub>2</sub>                         | Cu(OAc) <sub>2</sub> (4)  | NaOAc(4)     | Toluene | 28%                             | 21%                             |
| 11    | [Cp*RhCl <sub>2</sub> ] <sub>2</sub>                         | Cu(OAc) <sub>2</sub> (4)  | NaOAc(4)     | MeCN    | 24%                             | 45%                             |
| 12    | [Cp*RhCl <sub>2</sub> ] <sub>2</sub>                         | Cu(OAc) <sub>2</sub> (4)  | NaOAc(4)     | Dioxane | 42%                             | Trace                           |
| 13    | [Cp*RhCl <sub>2</sub> ] <sub>2</sub>                         | Cu(OAc) <sub>2</sub> (4)  | KOAc(4)      | DCE     | 20%                             | 36%                             |
| 14    | [Cp*IrCl <sub>2</sub> ] <sub>2</sub>                         | Cu(OAc) <sub>2</sub> (4)  | NaOAc(4)     | DCE     | 40%                             | Trace                           |
| 15    | [Cp*CoCl <sub>2</sub> ] <sub>2</sub>                         | Cu(OAc) <sub>2</sub> (4)  | NaOAc(4)     | DCE     | n.d.                            | n.d.                            |

<sup>a</sup> Reaction conditions: **1a**(0.1 mmol, 1 equiv), **2a**(0.4 mmol, 4 equiv), catalyst, base, oxidants in solvent (2 mL) under N<sub>2</sub> at 140 °C for 16 h. <sup>b</sup> Isolated yields.

### IV. General procedure for the synthesis of 12-azapyrene derivatives

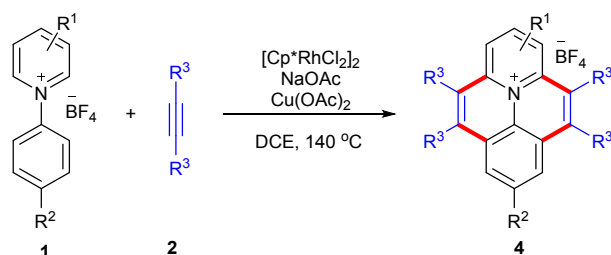

A flame-dried Schlenk tube equipped with a magnetic stir bar was charged with an

arylpiperidinium salt **1** (0.1 mmol), an alkyne **2** (0.4 mmol),  $[\text{Cp}^*\text{RhCl}_2]_2$  (3.1 mg, 0.005 mmol),  $\text{Cu}(\text{OAc})_2$  (73 mg, 0.4 mmol) and  $\text{NaOAc}$  (32.8 mg, 0.4 mmol) under  $\text{N}_2$ . Dry DCE (2.0 mL) was then added and the tube was sealed with a teflon-coated screw cap. The reaction solution was heated at 140 °C for 16 h. After cooled to ambient temperature, 4.0 mL of saturated  $\text{NaBF}_4$  (aq.) was added and the mixture was stirred at room temperature for another 0.5 h under air. The organic layer was then separated and the water layer was extracted with  $\text{CH}_2\text{Cl}_2$  (5.0 mL  $\times$  3). The combined organic phase was concentrated under vacuum and the residue was purified by column chromatography on  $\text{Al}_2\text{O}_3$  (neutral, 200-300 mesh) with  $\text{MeCN}/\text{CH}_2\text{Cl}_2$  (1/10 to 1/3) to provide the desired product.

## V. H/D Exchange experiments

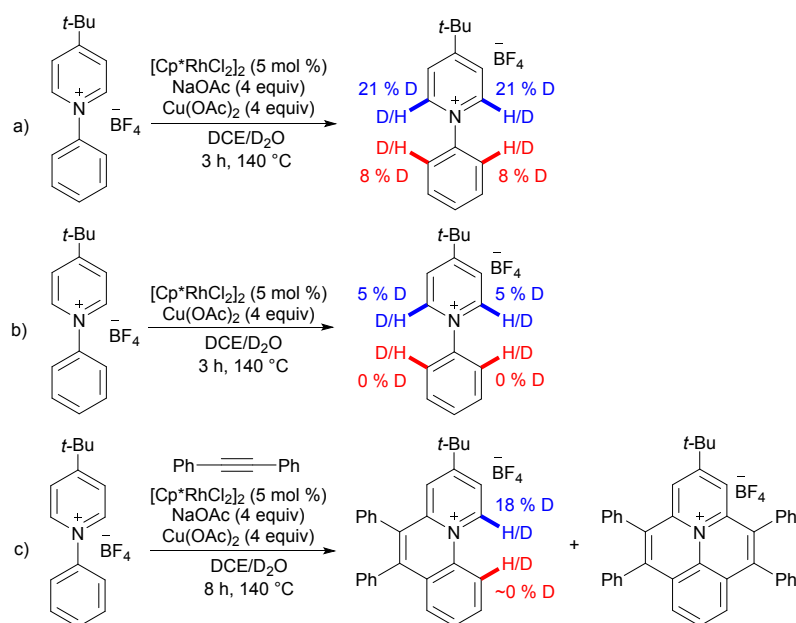

a) A flame-dried Schlenk tube equipped with a magnetic stir bar was charged with **1a** (0.1 mmol),  $[\text{Cp}^*\text{RhCl}_2]_2$  (3.1 mg, 0.005 mmol),  $\text{Cu}(\text{OAc})_2$  (73 mg, 0.4 mmol) and  $\text{NaOAc}$  (32.8 mg, 0.4 mmol) under  $\text{N}_2$ . Dry DCE (2.0 mL) and  $\text{D}_2\text{O}$  (1.0 mL) was then added and the tube was sealed with a teflon-coated screw cap. The reaction solution was heated at 140 °C for 3 h. After the mixture was cooled to room temperature, the solvent was removed by rotary evaporation. The crude residue was subjected to the  $^1\text{H}$  NMR analysis. The  $^1\text{H}$  NMR spectrum shows the incorporation

of deuterium into the labeled protons of the substrate **1a**.

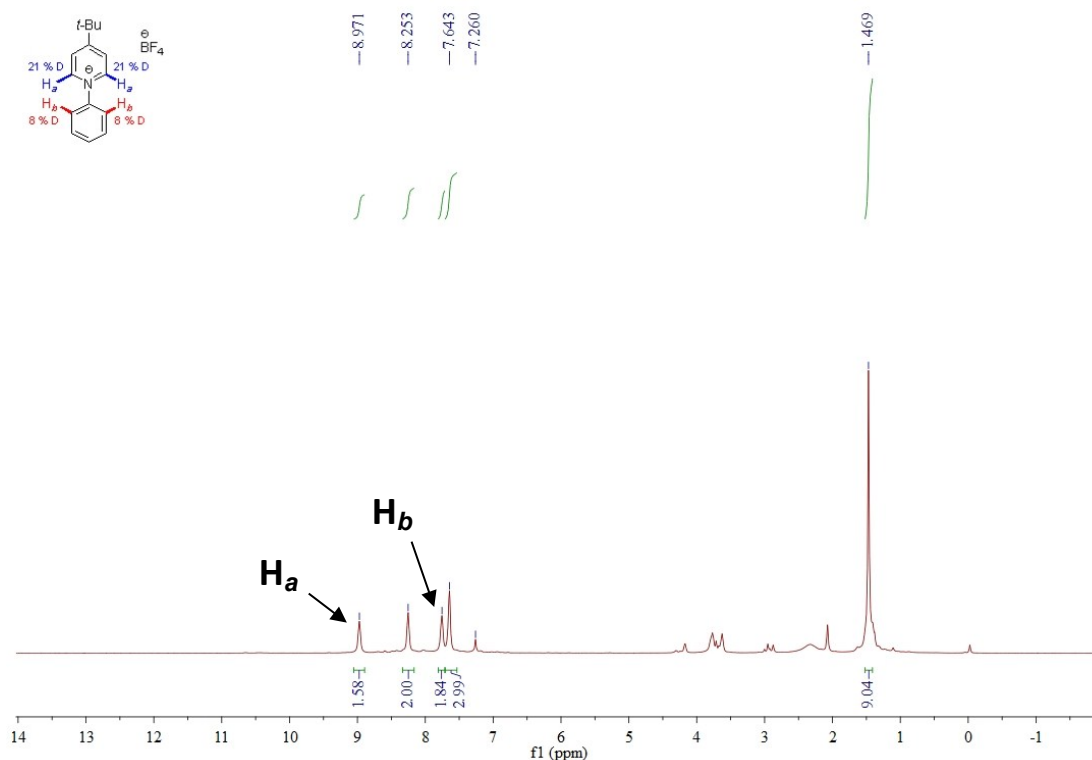

- b)** A flame-dried Schlenk tube equipped with a magnetic stir bar was charged with **1a** (0.1 mmol), [Cp\**RhCl*<sub>2</sub>]<sub>2</sub> (3.1 mg, 0.005 mmol) and Cu(OAc)<sub>2</sub> (73 mg, 0.4 mmol) under N<sub>2</sub>. Dry DCE (2.0 mL) and D<sub>2</sub>O (1.0 mL) was then added and the tube was sealed with a teflon-coated screw cap. The reaction solution was heated at 140 °C for 3 h. After the mixture was cooled to room temperature, the solvent was removed by rotary evaporation. The crude residue was subjected to the <sup>1</sup>H NMR analysis. The <sup>1</sup>H NMR spectrum shows the incorporation of deuterium into the labeled protons of the substrate **1a**.

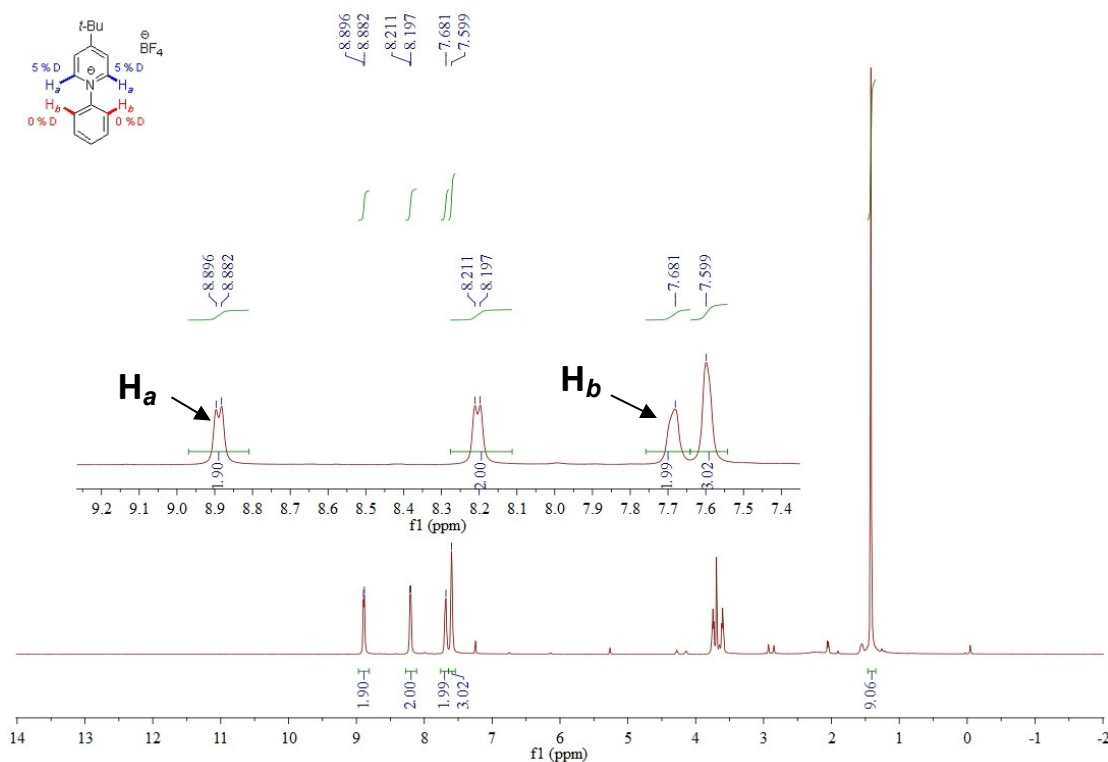

- c) A flame-dried Schlenk tube equipped with a magnetic stir bar was charged with **1a** (0.1 mmol), diphenylacetylene (0.4 mmol),  $[\text{Cp}^*\text{RhCl}_2]_2$  (3.1 mg, 0.005 mmol),  $\text{Cu}(\text{OAc})_2$  (73 mg, 0.4 mmol) and  $\text{NaOAc}$  (32.8 mg, 0.4 mmol) under  $\text{N}_2$ . Dry DCE (2.0 mL) and  $\text{D}_2\text{O}$  (1.0 mL) was then added and the tube was sealed with a teflon-coated screw cap. The reaction solution was heated at 140 °C for 3 h. After the mixture was cooled to room temperature, the solvent was removed by rotary evaporation. The crude residue was subjected to the  $^1\text{H}$  NMR analysis. The  $^1\text{H}$  NMR spectrum shows the incorporation of deuterium into the labeled protons of the single annulated product **3a**.

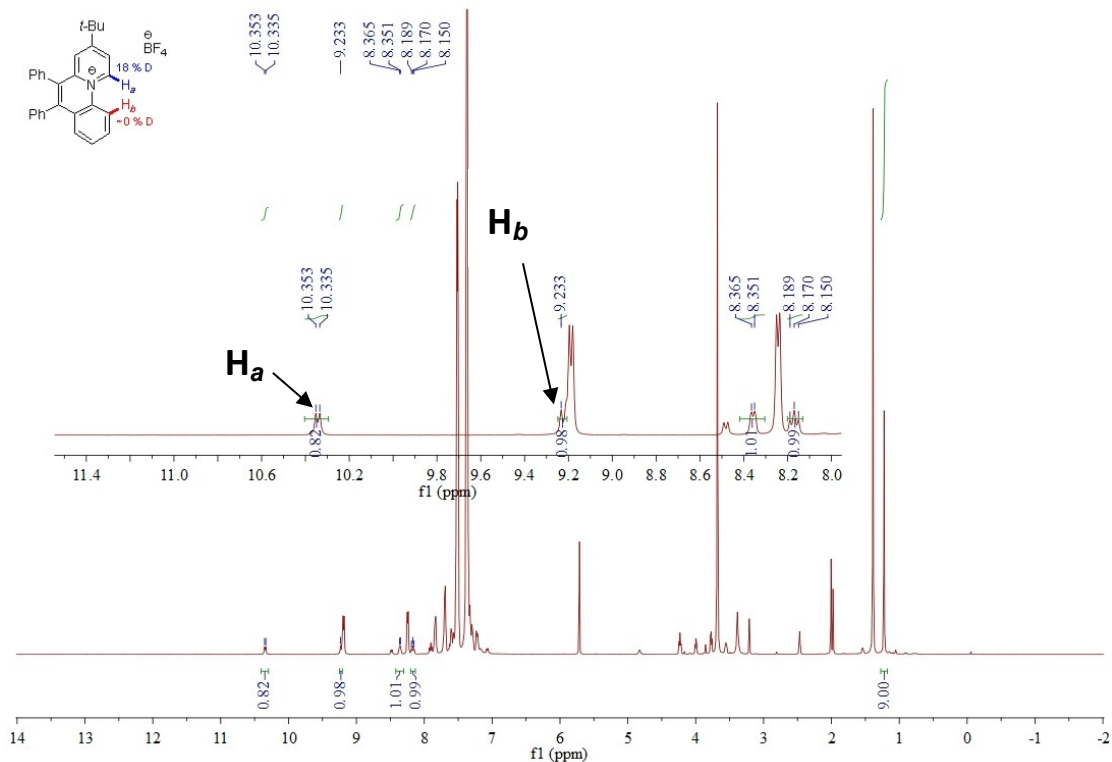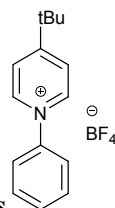

## VI. Experimental data for the described substances

**4-(*tert*-Butyl)-1-phenylpyridin-1-ium tetrafluoroborate (1a):** A white solid.  $^1\text{H}$  NMR (400 MHz,  $\text{CDCl}_3$ ):  $\delta = 1.43$  (s, 9H), 7.61 – 7.68 (m, 5H), 8.21 (d,  $J = 5.6$  Hz, 2H), 8.88 (d,  $J = 5.6$  Hz, 2H) ppm.  $^{13}\text{C}$  NMR (100 MHz,  $\text{CDCl}_3$ ):  $\delta = 30.0, 37.0, 124.0, 126.3, 130.9, 131.7, 142.3, 143.4, 172.8$  ppm.  $^{19}\text{F}$  NMR (376 MHz,  $\text{CDCl}_3$ ):  $\delta = -151.92$  (s) ppm. HRMS (ESI) calcd for  $[\text{C}_{15}\text{H}_{18}\text{N}]^+ [\text{M}-\text{BF}_4]^+$  212.1434, found 212.1431.

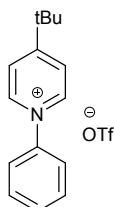

**4-(*tert*-butyl)-1-phenylpyridin-1-ium trifluoromethanesulfonate (4a'):** A white solid.  $^1\text{H}$  NMR (400 MHz,  $\text{CDCl}_3$ ):  $\delta = 1.45$  (s, 9H), 7.63 – 7.64 (m, 3H), 7.72 – 7.74 (m, 2H), 8.21 (d,  $J = 6.8$  Hz, 2H), 8.93 (dd,  $J = 6.4$  Hz, 1.2 Hz 2H) ppm.  $^{13}\text{C}$  NMR (100



MHz, CDCl<sub>3</sub>):  $\delta$  = 30.1, 37.1, 124.1, 126.3, 131.0, 131.8, 142.2, 143.6, 172.9 ppm. <sup>19</sup>F NMR (376 MHz, CDCl<sub>3</sub>):  $\delta$  = -78.27 (s) ppm. HRMS (ESI) calcd for [C<sub>15</sub>H<sub>18</sub>N]<sup>+</sup> [M-BF<sub>4</sub>]<sup>+</sup> 212.1434, found 212.1430.

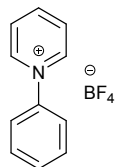

**1-Phenylpyridin-1-ium tetrafluoroborate (1b):** An off-white solid. <sup>1</sup>H NMR (400 MHz, DMSO-*d*<sub>6</sub>):  $\delta$  = 7.70 – 7.80 (m, 3H), 7.88 – 7.90 (m, 2H), 8.29 – 8.33 (m, 2H), 8.79 (tt, *J* = 8.0 Hz, 1.2 Hz, 1H), 9.34 – 9.35 (m, 2H) ppm. <sup>13</sup>C NMR (100 MHz, DMSO-*d*<sub>6</sub>):  $\delta$  = 124.8, 128.1, 130.2, 131.2, 142.8, 145.0, 146.6 ppm. <sup>19</sup>F NMR (376 MHz, DMSO-*d*<sub>6</sub>):  $\delta$  = -148.25 (s) ppm. HRMS (ESI) calcd for [C<sub>11</sub>H<sub>10</sub>N]<sup>+</sup> [M-BF<sub>4</sub>]<sup>+</sup> 156.0808, found 156.0808.

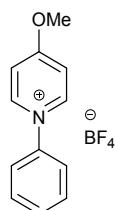

**4-Methoxy-1-phenylpyridinium tetrafluoroborate (1c):** An off-white solid. <sup>1</sup>H NMR (400 MHz, CDCl<sub>3</sub>):  $\delta$  = 4.19 (s, 3H), 7.61 – 7.64 (m, 7H), 8.67 – 8.70 (m, 2H) ppm. <sup>13</sup>C NMR (100 MHz, CDCl<sub>3</sub>):  $\delta$  = 58.6, 114.6, 123.9, 131.0, 131.4, 142.0, 145.3, 172.4 ppm. <sup>19</sup>F NMR (376 MHz, CDCl<sub>3</sub>):  $\delta$  = -152.15 (s) ppm. HRMS (ESI) calcd for [C<sub>12</sub>H<sub>12</sub>NO]<sup>+</sup> [M-BF<sub>4</sub>]<sup>+</sup> 186.0913, found 186.0913.

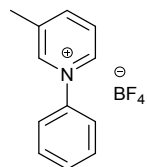

**3-Methyl-1-phenylpyridinium tetrafluoroborate (1d):** A reddish-brown solid. <sup>1</sup>H NMR (400 MHz, CDCl<sub>3</sub>):  $\delta$  = 2.71 (s, 3H), 7.60 – 7.69 (m, 5H), 8.01 (d, *J* = 6.4 Hz, 2H), 8.77 – 8.79 (m, 2H) ppm. <sup>13</sup>C NMR (100 MHz, CDCl<sub>3</sub>):  $\delta$  = 22.5, 124.07, 124.09, 129.7, 130.97, 130.99, 131.8, 142.4, 143.2, 161.2 ppm. <sup>19</sup>F NMR (376 MHz, CDCl<sub>3</sub>):  $\delta$  = -151.93 (s) ppm. HRMS (ESI) calcd for [C<sub>12</sub>H<sub>12</sub>N]<sup>+</sup> [M-BF<sub>4</sub>]<sup>+</sup> 170.0964, found

170.0964.

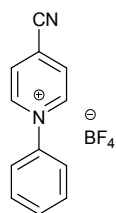

**4-Cyano-1-phenylpyridin-1-ium tetrafluoroborate (1e):** A light-brown solid.  $^1\text{H}$  NMR (400 MHz, DMSO-*d*<sub>6</sub>):  $\delta = 7.77 - 7.79$  (m, 3H),  $7.87 - 7.91$  (m, 2H),  $8.90$  (d,  $J = 6.0$  Hz, 2H),  $9.67$  (d,  $J = 7.2$  Hz, 2H) ppm.  $^{13}\text{C}$  NMR (100 MHz, DMSO-*d*<sub>6</sub>):  $\delta = 114.8, 124.8, 127.6, 130.3, 131.0, 131.9, 142.5, 146.4$  ppm.  $^{19}\text{F}$  NMR (376 MHz, DMSO-*d*<sub>6</sub>):  $\delta = -148.26$  (s) ppm. HRMS (ESI) calcd for  $[\text{C}_{12}\text{H}_9\text{N}]^+ [\text{M-BF}_4]^+$  181.0760, found 181.0758.

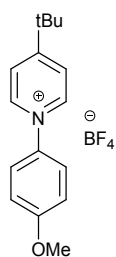

**4-(*tert*-Butyl)-1-(4-methoxyphenyl)pyridin-1-ium tetrafluoroborate (1f):** A yellowish solid.  $^1\text{H}$  NMR (400 MHz, CDCl<sub>3</sub>):  $\delta = 1.44$  (s, 9H),  $3.86$  (s, 9H),  $7.08$  (d,  $J = 8.8$  Hz, 2H),  $7.62$  (d,  $J = 8.8$  Hz, 2H),  $8.15$  (d,  $J = 6.4$  Hz, 2H),  $8.81$  (d,  $J = 6.4$  Hz, 2H) ppm.  $^{13}\text{C}$  NMR (100 MHz, CDCl<sub>3</sub>):  $\delta = 30.1, 36.9, 56.0, 110.2, 116.0, 125.3, 126.1, 143.2, 161.9, 172.1$  ppm.  $^{19}\text{F}$  NMR (376 MHz, CDCl<sub>3</sub>):  $\delta = -152.11$  (s) ppm. HRMS (ESI) calcd for  $[\text{C}_{16}\text{H}_{20}\text{NO}]^+ [\text{M-BF}_4]^+$  242.1539, found 242.1541.

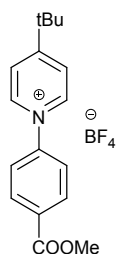

**4-*tert*-Butyl-1-(4-(methoxycarbonyl)phenyl)pyridinium tetrafluoroborate (1g):** A white solid.  $^1\text{H}$  NMR (400 MHz, CDCl<sub>3</sub>):  $\delta = 1.44$  (s, 9H),  $3.96$  (s, 3H),  $7.82$  (d,  $J = 8.4$  Hz, 2H),  $8.20$  (d,  $J = 6.8$  Hz, 2H),  $8.25$  (d,  $J = 8.4$  Hz, 2H),  $8.90$  (d,  $J = 6.8$  Hz, 2H)

ppm.  $^{13}\text{C}$  NMR (100 MHz,  $\text{CDCl}_3$ ):  $\delta = 29.99, 37.2, 52.9, 124.4, 126.4, 132.2, 133.2, 143.3, 145.2, 165.3, 173.6$  ppm.  $^{19}\text{F}$  NMR (376 MHz,  $\text{CDCl}_3$ ):  $\delta = -151.70$  (s) ppm. HRMS (ESI) calcd for  $[\text{C}_{17}\text{H}_{20}\text{NO}_2]^+ [\text{M-BF}_4]^+$  270.1489, found 270.1487.

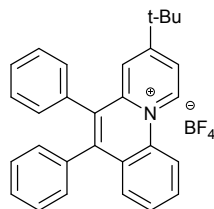

### 3-(*tert*-Butyl)-5,6-bis(4-chlorophenyl)pyrido[1,2-*a*]quinolin-11-ium

**tetrafluoroborate (3a):** Product **3a** was prepared according to the general procedure as a white solid (39.3 mg, 83 %).  $^1\text{H}$  NMR (400 MHz,  $\text{CDCl}_3$ ):  $\delta = 1.32$  (s, 9H), 7.16 – 7.20 (m, 4H), 7.32 – 7.37 (m, 6H), 7.74 (d,  $J = 8.0$  Hz, 1H), 7.80 (d,  $J = 7.2$  Hz, 1H), 7.83 (s, 1H), 8.15 (t,  $J = 8.0$  Hz, 1H), 8.38 (d,  $J = 6.8$  Hz, 1H), 9.19 (d,  $J = 8.8$  Hz, 1H), 10.41 (d,  $J = 7.2$  Hz, 1H) ppm.  $^{13}\text{C}$  NMR (100 MHz,  $\text{CDCl}_3$ ):  $\delta = 29.9, 36.5, 118.5, 122.7, 123.9, 126.9, 128.6, 128.9, 129.09, 129.11, 129.5, 129.8, 130.5, 130.6, 133.1, 133.8, 133.9, 134.0, 134.6, 134.9, 143.3, 147.3, 166.0$  ppm.  $^{19}\text{F}$  NMR (376 MHz,  $\text{CDCl}_3$ ):  $\delta = -152.78$  (s) ppm. HRMS (ESI) calcd for  $[\text{C}_{29}\text{H}_{26}\text{N}]^+ [\text{M-BF}_4]^+$  388.2060, found 388.2051.

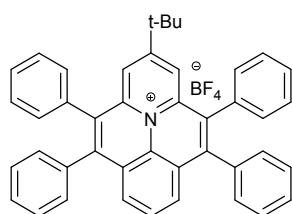

### 2-(*tert*-Butyl)-4,5,9,10-tetraphenylquinolizino[3,4,5,6-*ija*]quinolin-11-ium

**tetrafluoroborate (4a):** Product **4a** was prepared according to the general procedure as a yellow-green solid (58.5 mg, 90 %).  $^1\text{H}$  NMR (400 MHz,  $\text{DMSO-}d_6$ ):  $\delta = 1.12$  (s, 9H), 7.34 – 7.36 (m, 4H), 7.39 – 7.51 (m, 16H), 7.83 (s, 2H), 7.86 (d,  $J = 8.0$  Hz, 2H), 8.19 (t,  $J = 8.0$  Hz, 1H) ppm.  $^{13}\text{C}$  NMR (100 MHz,  $\text{DMSO-}d_6$ ):  $\delta = 29.4, 35.5, 120.3, 126.8, 127.4, 128.6, 128.80, 128.83, 128.9, 129.2, 129.8, 130.3, 131.4, 134.5, 134.7, 134.9, 141.9, 144.8, 159.9$  ppm.  $^{19}\text{F}$  NMR (376 MHz,  $\text{DMSO-}d_6$ ):  $\delta = -148.34$  (s) ppm. HRMS (ESI) calcd for  $[\text{C}_{43}\text{H}_{34}\text{N}]^+ [\text{M-BF}_4]^+$  564.2686, found 564.2682.

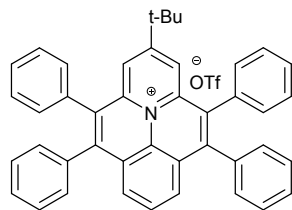

**2-(*tert*-Butyl)-4,5,9,10-tetraphenylquinolizino[3,4,5,6-*ija*]quinolin-11-ium**

**tetrafluoroborate (4a')**: Product **4a'** was prepared according to the general procedure as a yellow solid (48.4 mg, 68 %).  $^1\text{H}$  NMR (400 MHz,  $\text{DMSO-}d_6$ ):  $\delta = 1.12$  (s, 9H), 7.32 – 7.36 (m, 4H), 7.39 – 7.51 (m, 16H), 7.83 (s, 2H), 7.876 (d,  $J = 8.0$  Hz, 2H), 8.19 (t,  $J = 8.0$  Hz, 1H) ppm.  $^{13}\text{C}$  NMR (100 MHz,  $\text{DMSO-}d_6$ ):  $\delta = 29.4, 35.5, 120.3, 126.8, 127.4, 128.6, 128.80, 128.83, 128.9, 129.2, 129.8, 130.3, 131.4, 134.5, 134.7, 134.9, 141.9, 144.8, 159.9$  ppm.  $^{19}\text{F}$  NMR (376 MHz,  $\text{DMSO-}d_6$ ):  $\delta = -77.77$  (s) ppm. HRMS (ESI) calcd for  $[\text{C}_{43}\text{H}_{34}\text{N}]^+ [\text{M-BF}_4]^+$  564.2686, found 564.2684.

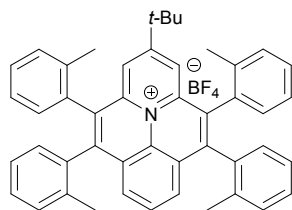

**2-(*tert*-Butyl)-4,5,9,10-tetra-*o*-tolylquinolizino[3,4,5,6-*ija*]quinolin-11-ium**

**tetrafluoroborate (4b)**: Product **4b** was prepared according to the general procedure as a green solid (58.1 mg, 82 %).  $^1\text{H}$  NMR (400 MHz,  $\text{DMSO-}d_6$ ):  $\delta = 1.1 - 1.13$  (m, 9H), 2.03 – 2.30 (m, 12H), 7.10 – 7.44 (m, 16H), 7.65 – 7.67 (m, 4H), 8.14 – 8.20 (m, 1H) ppm.  $^{13}\text{C}$  NMR (100 MHz,  $\text{DMSO-}d_6$ ):  $\delta = 19.2, 19.3, 29.4, 35.3, 109.6, 112.4, 119.6, 125.8, 126.0, 126.4, 126.5, 127.0, 128.9, 129.2, 129.3, 130.46, 130.47, 130.54, 130.6, 131.9, 133.5, 133.8, 133.9, 134.09, 134.13, 135.5, 135.6, 136.4, 141.36, 141.38, 144.9, 145.0, 160.3, 160.4$  ppm. HRMS (ESI) calcd for  $[\text{C}_{47}\text{H}_{42}\text{N}]^+ [\text{M-BF}_4]^+$  620.3312, found 620.3307.

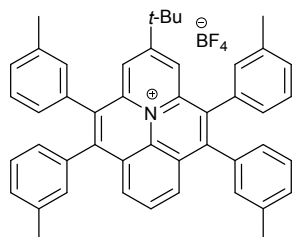

**2-(*tert*-Butyl)-5,6,10,11-tetram-tolylquinolizino[3,4,5,6-*ija*]quinolinium**

**tetrafluoroborate (4c):** Product **4c** was prepared according to the general procedure as a yellow-green solid (60.1 mg, 85 %).  $^1\text{H}$  NMR (400 MHz,  $\text{DMSO-}d_6$ ):  $\delta = 1.13$  (s, 9H), 2.30 (s, 6H), 2.31 (s, 6H), 7.11-7.26 (m, 12H), 7.32-7.40 (m, 4H), 7.84-7.86 (m, 4H), 8.17 (t,  $J = 8.0$  Hz, 1H) ppm.  $^{13}\text{C}$  NMR (100 MHz,  $\text{DMSO-}d_6$ ):  $\delta = 20.9, 20.9, 20.98, 21.01, 29.4, 35.5, 120.3, 126.3, 126.4, 126.8, 127.3, 127.37, 127.39, 128.61, 128.63, 128.7, 129.2, 129.25, 129.34, 129.4, 129.5, 129.7, 130.7, 130.8, 131.2, 134.39, 134.44, 134.66, 134.69, 134.8, 134.85, 137.91, 137.93, 138.1, 141.86, 141.88, 144.66, 144.72, 159.7$  ppm. HRMS (ESI) calcd for  $[\text{C}_{47}\text{H}_{42}\text{N}]^+ [\text{M-BF}_4]^+$  620.3312, found 620.3311.

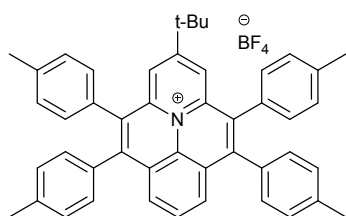

**2-(tert-Butyl)-4,5,9,10-tetra-p-tolylquinolizino[3,4,5,6-ija]quinolin-11-ium**

**tetrafluoroborate (4d):** Product **4d** was prepared according to the general procedure as a yellow-green solid (61.4 mg, 87 %).  $^1\text{H}$  NMR (400 MHz,  $\text{DMSO-}d_6$ ):  $\delta = 1.12$  (s, 9H), 2.34 (s, 6H), 2.35 (s, 6H), 7.21 – 7.23 (m, 4H), 7.27 – 7.32 (m, 12H), 7.81 – 7.82 (m, 4H), 8.13 (t,  $J = 8.2$  Hz, 1H) ppm.  $^{13}\text{C}$  NMR (100 MHz,  $\text{DMSO-}d_6$ ):  $\delta = 20.90, 20.93, 29.5, 35.5, 120.2, 126.7, 127.6, 129.1, 129.4, 129.5, 129.6, 130.2, 131.3, 132.0, 132.1, 134.5, 137.9, 138.0, 142.1, 144.8, 159.7$  ppm. HRMS (ESI) calcd for  $[\text{C}_{47}\text{H}_{42}\text{N}]^+ [\text{M-BF}_4]^+$  620.3312, found 620.3308.

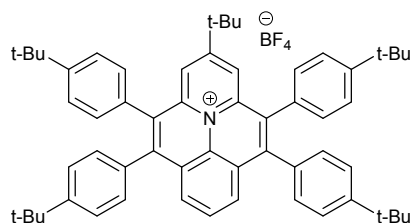

**2-(tert-Butyl)-4,5,9,10-tetrakis(4-(tert-butyl)phenyl)quinolizino[3,4,5,6-**

**ija]quinolin-11-ium tetrafluoroborate (4e):** Product **4e** was prepared according to the general procedure as a yellow solid (78.8 mg, 90 %).  $^1\text{H}$  NMR (400 MHz,  $\text{DMSO-}d_6$ ):  $\delta = 1.13$  (s, 9H), 1.27 (s, 36H), 7.22 (d,  $J = 8.0$  Hz, 4H), 7.28 (d,  $J = 8.0$  Hz, 4H), 7.43

– 7.47 (m, 8H), 7.87 (s, 2H), 7.92 (d,  $J = 8.0$  Hz, 2H), 8.20 (t,  $J = 8.0$  Hz, 1H) ppm.  $^{13}\text{C}$  NMR (100 MHz, DMSO- $d_6$ ):  $\delta = 29.4, 30.92, 30.93, 34.41, 34.44, 35.4, 120.1, 125.3, 125.4, 126.67, 126.68, 127.4, 129.0, 130.1, 131.3, 131.9, 132.1, 134.7, 141.9, 145.0, 150.9, 151.1, 159.7$  ppm. HRMS (ESI) calcd for  $[\text{C}_{59}\text{H}_{66}\text{N}]^+ [\text{M-BF}_4]^+$  788.5190, found 788.5184.

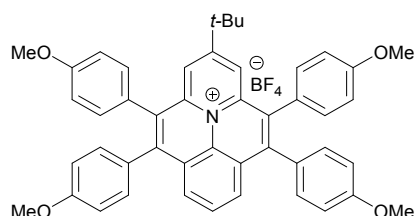

**2-(*tert*-Butyl)-4,5,9,10-tetrakis(4-methoxyphenyl)quinolizino[3,4,5,6-*ija*]quinolin-11-ium tetrafluoroborate (4f):** Product **4f** was prepared according to the general procedure as a green solid (71 mg, 92 %).  $^1\text{H}$  NMR (400 MHz, DMSO- $d_6$ ):  $\delta = 1.16$  (s, 9H), 3.79 (s, 6H), 3.80 (s, 6H), 7.02 – 7.06 (m, 8H), 7.25 (d,  $J = 8.8$  Hz, 4H), 7.31 (d,  $J = 8.8$  Hz, 4H), 7.87 (s, 3H), 7.89 (s, 1H), 8.15 (t,  $J = 8.0$  Hz, 1H) ppm.  $^{13}\text{C}$  NMR (100 MHz, DMSO- $d_6$ ):  $\delta = 29.5, 35.5, 55.16, 55.18, 114.25, 114.31, 120.1, 126.7, 126.9, 127.1, 127.8, 129.6, 130.7, 131.3, 131.7, 134.5, 142.3, 144.9, 159.0, 159.1, 159.7$  ppm. HRMS (ESI) calcd for  $[\text{C}_{47}\text{H}_{42}\text{NO}_4]^+ [\text{M-BF}_4]^+$  684.3108, found 684.3099.

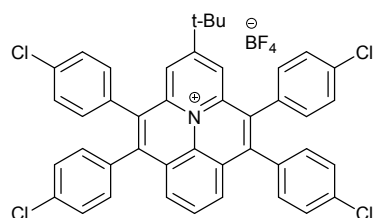

**2-(*tert*-Butyl)-4,5,9,10-tetrakis(4-chlorophenyl)quinolizino[3,4,5,6-*ija*]quinolin-11-ium tetrafluoroborate (4g):** Product **4g** was prepared according to the general procedure as a yellow solid (78.8 mg, 90 %).  $^1\text{H}$  NMR (400 MHz, DMSO- $d_6$ ):  $\delta = 1.18$  (s, 9H), 7.38 (d,  $J = 8.0$  Hz, 4H), 7.46 (d,  $J = 8.4$  Hz, 4H), 7.59 (t,  $J = 8.0$  Hz, 8H), 7.84 (s, 2H), 7.89 (d,  $J = 8.0$  Hz, 2H), 8.19 (t,  $J = 8.0$  Hz, 1H) ppm.  $^{13}\text{C}$  NMR (100 MHz, DMSO- $d_6$ ):  $\delta = 29.5, 35.7, 120.5, 127.0, 127.2, 129.1, 129.2, 130.1, 131.2, 131.4, 132.3, 133.3, 133.5, 133.59, 133.61, 133.8, 141.6, 144.1, 160.6$  ppm. HRMS (ESI) calcd for  $[\text{C}_{47}\text{H}_{30}\text{Cl}_4\text{N}]^+ [\text{M-BF}_4]^+$  700.1127, found 700.1134.

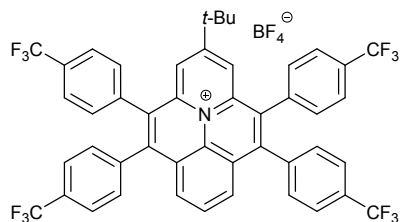

**2-*tert*-Butyl-5,6,10,11-tetrakis(4-(trifluoromethyl)phenyl)quinolizino[3,4,5,6-**

***ija*]quinolinium tetrafluoroborate (4h):** Product **4h** was prepared according to the general procedure as a green solid (85.8 mg, 93 %). <sup>1</sup>H NMR (400 MHz, DMSO-*d*<sub>6</sub>): δ = 1.16 (s, 9H), 7.62 (d, *J* = 8.0 Hz, 4H), 7.70 (d, *J* = 7.6 Hz, 4H), 7.80 (s, 2H), 7.87 – 7.91 (m, 10H), 8.22 (t, *J* = 8.0 Hz, 1H) ppm. <sup>13</sup>C NMR (100 MHz, DMSO-*d*<sub>6</sub>): δ = 29.35, 35.71, 120.67, 123.89 (q, *J*<sub>C-F</sub> = 272.1 Hz), 123.92 (q, *J*<sub>C-F</sub> = 272.4 Hz), 125.90 (q, *J*<sub>C-F</sub> = 3.8 Hz), 125.98 (q, *J*<sub>C-F</sub> = 3.5 Hz), 126.75, 127.43, 129.28 (q, *J*<sub>C-F</sub> = 32.1 Hz), 129.45 (q, *J*<sub>C-F</sub> = 32.1 Hz), 130.40, 131.49, 131.53, 133.44, 138.72, 141.31, 143.90, 160.89 ppm. <sup>19</sup>F NMR (376 MHz, DMSO-*d*<sub>6</sub>): δ = -61.24 (d, *J* = 4.0 Hz, 4H), -148.34 (s) ppm. HRMS (ESI) calcd for [C<sub>47</sub>H<sub>30</sub>NF<sub>12</sub>]<sup>+</sup> [M-BF<sub>4</sub>]<sup>+</sup> 836.2181, found 836.2179.

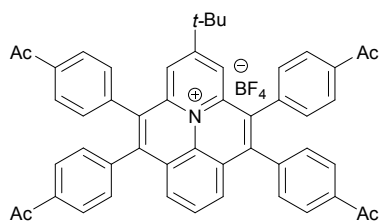

**4,5,9,10-Tetrakis(4-acetylphenyl)-2-(*tert*-butyl)quinolizino[3,4,5,6-*ija*]quinolin-**

***ium* tetrafluoroborate (4i):** Product **4i** was prepared according to the general procedure as a yellow solid (68.8 mg, 84%). <sup>1</sup>H NMR (400 MHz, DMSO-*d*<sub>6</sub>): δ = 1.13 (s, 9H), 2.60 (s, 6H), 2.61 (s, 6H), 7.55 (d, *J* = 8.4 Hz, 4H), 7.62 (d, *J* = 8.4 Hz, 4H), 7.79 (s, 2H), 7.82 (d, *J* = 8.0 Hz, 2H), 8.05 – 8.08 (m, 8H), 8.18 (t, *J* = 8.0 Hz, 1H) ppm. <sup>13</sup>C NMR (100 MHz, DMSO-*d*<sub>6</sub>): δ = 26.85, 26.88, 29.4, 35.7, 120.6, 126.9, 127.2, 128.8, 128.9, 129.8, 130.2, 130.9, 131.4, 133.6, 136.7, 136.8, 139.0, 139.2, 141.4, 144.1, 160.6, 197.5, 197.6 ppm. HRMS (ESI) calcd for [C<sub>51</sub>H<sub>42</sub>NO<sub>4</sub>]<sup>+</sup> [M-BF<sub>4</sub>]<sup>+</sup> 732.3108, found 732.3093.

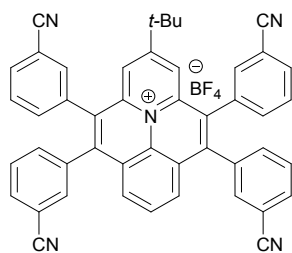

**2-(*tert*-Butyl)-4,5,9,10-tetrakis(3-cyanophenyl)quinolizino[3,4,5,6-*ija*]quinolin-11-ium tetrafluoroborate (4j):** Product **4j** was prepared according to the general procedure as a yellow solid (61.6 mg, 82 %).  $^1\text{H}$  NMR (400 MHz, DMSO-*d*<sub>6</sub>):  $\delta$  = 1.19 (s, 9H), 7.61 – 7.82 (m, 11H), 7.91 – 8.06 (m, 9H), 8.22 (t,  $J$  = 8.0 Hz, 1H) ppm.  $^{13}\text{C}$  NMR (100 MHz, DMSO-*d*<sub>6</sub>):  $\delta$  = 29.4, 35.9, 112.06, 112.14, 118.2, 121.0, 126.7, 127.7, 130.4, 130.47, 130.53, 131.5, 132.9, 133.1, 133.2, 133.95, 133.98, 134.2, 135.1, 135.2, 135.3, 135.4, 135.6, 141.2, 143.6 ppm. HRMS (ESI) calcd for  $[\text{C}_{47}\text{H}_{30}\text{N}_5]^+ [\text{M}-\text{BF}_4]^+$  664.2496, found 664.2499.

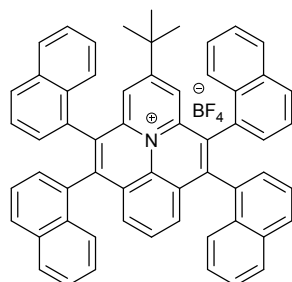

**2-(*tert*-Butyl)-4,5,9,10-tetra(naphthalen-1-yl)quinolizino[3,4,5,6-*ija*]quinolin-11-ium tetrafluoroborate (4k):** Product **4k** was prepared according to the general procedure as a yellow solid (63.8 mg, 75 %).  $^1\text{H}$  NMR (400 MHz, DMSO-*d*<sub>6</sub>):  $\delta$  = 0.68 (s, 9H), 7.14 – 7.30 (m, 8H), 7.50 – 7.74 (m, 11H), 7.80 – 8.02 (m, 14H) ppm. HRMS (ESI) calcd for  $[\text{C}_{59}\text{H}_{42}\text{N}]^+ [\text{M}-\text{BF}_4]^+$  764.3312, found 764.3302.

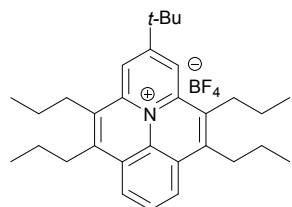

**2-(*tert*-butyl)-4,5,9,10-tetrapropylquinolizino[3,4,5,6-*ija*]quinolin-11-ium (4l):** Product **4l** was prepared according to the general procedure as a yellow solid (39.6 mg, 77 %).  $^1\text{H}$  NMR (400 MHz,  $\text{CDCl}_3$ ):  $\delta$  = 1.236 – 1.244 (m, 12H), 1.62 (s, 9H), 1.78 –



1.84 (m, 8H), 3.23 – 3.29 (m, 8H), 8.31 (t,  $J = 8.0$  Hz, 1H), 8.43 – 8.47 (m, 4H), ppm.  $^{13}\text{C}$  NMR (100 MHz,  $\text{CDCl}_3$ ):  $\delta = 14.7, 14.8, 22.7, 23.0, 30.6, 31.8, 32.0, 36.5, 117.8, 124.3, 126.8, 129.9, 130.4, 132.1, 140.9, 144.6, 160.8$  ppm. HRMS (ESI) calcd for  $[\text{C}_{31}\text{H}_{42}\text{N}]^+ [\text{M-BF}_4]^+$  428.3312, found 428.3310.

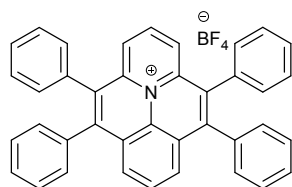

**4,5,9,10-Tetraphenylquinolizino[3,4,5,6-*ija*]quinolin-11-ium tetrafluoroborate**

**(4m):** Product **4m** was prepared according to the general procedure as a yellow solid (48.2 mg, 81 %).  $^1\text{H}$  NMR (400 MHz,  $\text{DMSO-}d_6$ ):  $\delta = 7.32 - 7.34$  (m, 4H), 7.39 – 7.46 (m, 16H), 7.88 (d,  $J = 8.0$  Hz, 2H), 8.02 (d,  $J = 8.0$  Hz, 2H), 8.21 (t,  $J = 8.0$  Hz, 1H), 8.55 (t,  $J = 8.0$  Hz, 1H) ppm.  $^{13}\text{C}$  NMR (100 MHz,  $\text{DMSO-}d_6$ ):  $\delta = 124.0, 126.6, 127.7, 128.6, 128.7, 128.8, 128.9, 129.2, 129.9, 130.3, 131.3, 131.8, 134.8, 134.9, 137.7, 141.9, 144.8$  ppm. HRMS (ESI) calcd for  $[\text{C}_{43}\text{H}_{34}\text{N}]^+ [\text{M-BF}_4]^+$  564.2686, found 564.2682.

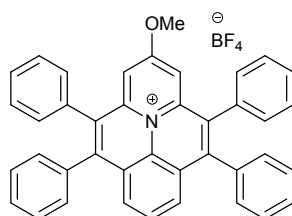

**2-Methoxy-4,5,9,10-tetraphenylquinolizino[3,4,5,6-*ija*]quinolin-11-ium**

**tetrafluoroborate (4n):** Product **4n** was prepared according to the general procedure as a grey solid (48.1 mg, 77 %).  $^1\text{H}$  NMR (400 MHz,  $\text{DMSO-}d_6$ ):  $\delta = 3.34 - 4.32$  (m, 3H), 7.21 – 7.27 (m, 3H), 7.32 – 7.33 (m, 4H), 7.38 – 7.45 (m, 15H), 7.77 (d,  $J = 8.0$  Hz, 2H), 8.09 (t,  $J = 8.0$  Hz, 1H) ppm.  $^{13}\text{C}$  NMR (100 MHz,  $\text{DMSO-}d_6$ ):  $\delta = 56.9, 109.0, 126.5, 127.17, 127.18, 128.5, 128.7, 128.8, 128.9, 129.2, 130.3, 131.2, 133.8, 134.6, 134.9, 144.4, 144.5, 163.6$  ppm. HRMS (ESI) calcd for  $[\text{C}_{40}\text{H}_{28}\text{NO}]^+ [\text{M-BF}_4]^+$  548.2165, found 548.2169.

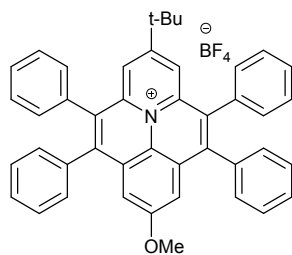

**2-(*tert*-Butyl)-7-methoxy-4,5,9,10-tetraphenylquinolizino[3,4,5,6-*ija*]quinolin-11-ium tetrafluoroborate (4o):** Product **4o** was prepared according to the general procedure as a yellow solid (50.4 mg, 74 %). <sup>1</sup>H NMR (400 MHz, CDCl<sub>3</sub>): δ = 1.17 (s, 9 H), 3.70 (s, 3H), 7.28 – 7.37 (m, 22H), 7.93 (s, 2H) ppm. <sup>13</sup>C NMR (100 MHz, CDCl<sub>3</sub>): δ = 30.1, 35.9, 55.9, 112.6, 121.7, 128.65, 128.74, 128.9, 129.0, 129.6, 130.0, 130.7, 131.8, 135.2, 135.3, 135.5, 141.3, 144.9, 159.2, 159.5 ppm. HRMS (ESI) calcd for [C<sub>44</sub>H<sub>36</sub>NO]<sup>+</sup> [M-BF<sub>4</sub>]<sup>+</sup> 594.2791, found 594.2794.

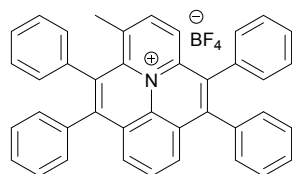

**1-Methyl-4,5,9,10-tetraphenylquinolizino[3,4,5,6-*ija*]quinolin-11-ium tetrafluoroborate (4p):** Product **4p** was prepared according to the general procedure as a green solid (36.6 mg, 70 %). <sup>1</sup>H NMR (400 MHz, DMSO-*d*<sub>6</sub>): δ = 2.56 (s, 3H), 7.30 – 7.47 (m, 20H), 7.76 (s, 2H), 7.82 (d, *J* = 8.0 Hz, 2H), 8.16 (t, *J* = 8.0 Hz, 1H) ppm. <sup>13</sup>C NMR (100 MHz, DMSO-*d*<sub>6</sub>): δ = 21.6, 124.1, 126.7, 127.3, 128.5, 128.69, 128.72, 128.8, 129.2, 129.6, 130.4, 131.5, 134.3, 134.7, 135.0, 141.5, 144.8, 149.7 ppm. HRMS (ESI) calcd for [C<sub>44</sub>H<sub>36</sub>N]<sup>+</sup> [M-BF<sub>4</sub>]<sup>+</sup> 522.2216, found 522.2208.

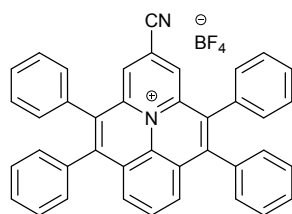

**2-Cyano-4,5,9,10-tetraphenylquinolizino[3,4,5,6-*ija*]quinolin-11-ium tetrafluoroborate (4q):** Product **4q** was prepared according to the general procedure as a reddish-brown solid (37.9 mg, 61 %). <sup>1</sup>H NMR (400 MHz, DMSO-*d*<sub>6</sub>): δ = 7.32 –

7.33 (m, 4H), 7.37 – 7.46 (m, 16H), 8.02 (d,  $J = 7.6$  Hz, 2H), 8.33-8.39 (m, 3H) ppm.  $^{13}\text{C}$  NMR (100 MHz,  $\text{DMSO-}d_6$ ):  $\delta = 115.4, 118.9, 125.5, 127.6, 128.0, 128.8, 128.98, 129.03, 129.1, 130.5, 131.2, 131.84, 133.84, 134.5, 135.0, 142.2, 146.8$  ppm. HRMS (ESI) calcd for  $[\text{C}_{40}\text{H}_{25}\text{N}_2]^+ [\text{M-BF}_4]^+$  533.2012, found 533.2007.

**2-(*tert*-Butyl)-7-(methoxycarbonyl)-4,5,9,10-tetra-*o*-tolylquinolizino[3,4,5,6-*ija*]quinolin-11-ium tetrafluoroborate (4r):** Product **4r** was prepared according to the general procedure as a greenish solid (49.9 mg, 64 %).  $^1\text{H}$  NMR (400 MHz,  $\text{DMSO-}d_6$ ):  $\delta = 1.13$  (s, 9H), 2.03 – 2.31 (m, 12H), 3.79 (s, 3H), 7.26 – 7.43 (m, 16H), 7.72 (s, 2H), 8.13 (s, 2H) ppm.  $^{13}\text{C}$  NMR (100 MHz,  $\text{DMSO-}d_6$ ):  $\delta = 19.2, 19.3, 29.4, 35.5, 53.2, 109.6, 112.4, 120.1, 125.8, 126.0, 126.1, 127.5, 129.2, 129.4, 130.6, 130.7, 131.8, 133.2, 133.4, 135.1, 135.47, 135.51, 136.3, 141.8, 144.9, 164.6, 192.5$  ppm. HRMS (ESI) calcd for  $[\text{C}_{49}\text{H}_{44}\text{NO}_2]^+ [\text{M-BF}_4]^+$  678.3367, found 678.3360.

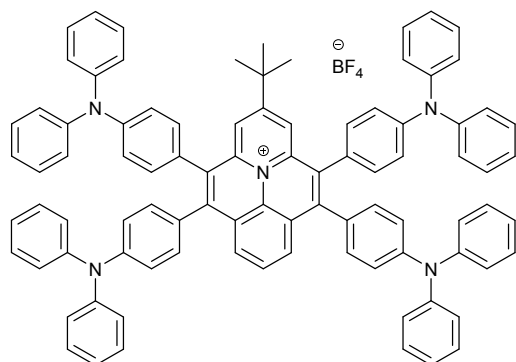

**2-(*tert*-Butyl)-4,5,9,10-tetrakis(4-(diphenylamino)phenyl)quinolizino[3,4,5,6-*ija*]quinolin-11-ium tetrafluoroborate (4s):** Product **4s** was prepared according to the general procedure as a crimson solid (121.2 mg, 92 %).  $^1\text{H}$  NMR (400 MHz,  $\text{DMSO-}d_6$ )  $\delta = 1.28$  (s, 9H), 7.05 – 7.12 (m, 32H), 7.21 – 7.25 (m, 8H), 7.32 – 7.36 (m, 16H), 8.07 (s, 2H), 8.17 (d,  $J = 8$  Hz, 2H), 8.29 (t,  $J = 8$  Hz, 1H) ppm.  $^{13}\text{C}$  NMR (100 MHz,  $\text{DMSO-}d_6$ ):  $\delta = 29.5, 35.6, 120.16, 122.58, 123.22, 123.23, 123.5, 123.6, 124.0, 124.2, 126.9, 127.3, 128.6, 128.8, 129.69, 129.70, 130.8, 131.5, 131.8, 134.5, 141.9, 144.8, 146.8, 146.9, 147.35, 147.38, 159.85$  ppm. HRMS (ESI) calcd for  $[\text{C}_{91}\text{H}_{71}\text{N}_5]^+ [\text{M-BF}_4+\text{H}]^+$  1233.5704, found 1233.5708.

## VII. Photophysical spectra of 12-azapyrene derivatives in CH<sub>2</sub>Cl<sub>2</sub>

| Compound  | $\lambda_{\max}$ | $\lambda_{\text{ex}}$ | $\lambda_{\text{em}}$ | $\Phi_{\text{F}}$ |
|-----------|------------------|-----------------------|-----------------------|-------------------|
| <b>4a</b> | 354              | 356                   | 468                   | 0.76              |
| <b>4b</b> | 353              | 354                   | 458                   | 0.79              |
| <b>4c</b> | 355              | 356                   | 472                   | 0.75              |
| <b>4d</b> | 356              | 356                   | 475                   | 0.62              |
| <b>4e</b> | 358              | 359                   | 476                   | 0.91              |
| <b>4f</b> | 357              | 353                   | 489                   | 0.78              |
| <b>4g</b> | 354              | 351                   | 471                   | 0.61              |
| <b>4h</b> | 351              | 352                   | 464                   | 0.28              |
| <b>4i</b> | 353              | 355                   | 469                   | 0.68              |
| <b>4j</b> | 351              | 352                   | 463                   | 0.68              |
| <b>4k</b> | 352              | 353                   | 467                   | 0.59              |
| <b>4l</b> | 354              | 351                   | 451                   | 0.48              |
| <b>4m</b> | 355              | 355                   | 481                   | 0.58              |
| <b>4n</b> | 355              | 355                   | 452                   | 0.66              |
| <b>4o</b> | 316              | 362                   | 460                   | 0.59              |
| <b>4p</b> | 355              | 355                   | 468                   | 0.70              |
| <b>4q</b> | 365              | 360                   | 536                   | 0.36              |
| <b>4r</b> | 354              | 355                   | 460                   | 0.77              |
| <b>4s</b> | 438              | 489                   | 614                   | 0.26              |

**Table S2** Photophysical data of 12-azapyrene derivatives in CH<sub>2</sub>Cl<sub>2</sub>

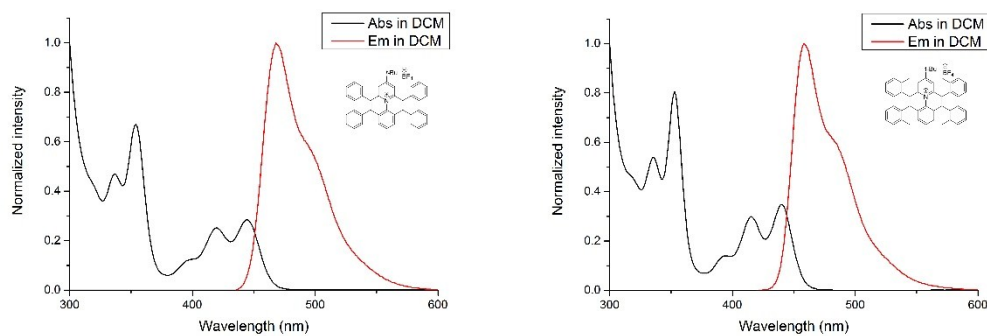

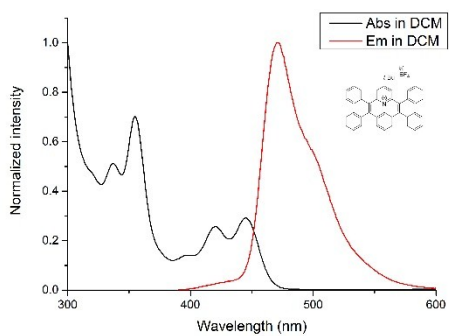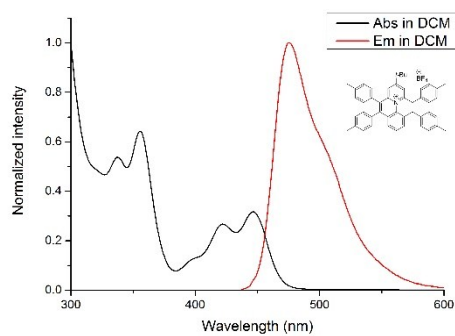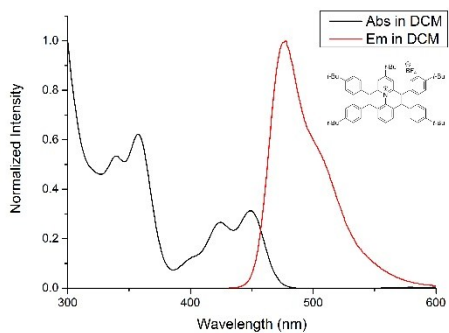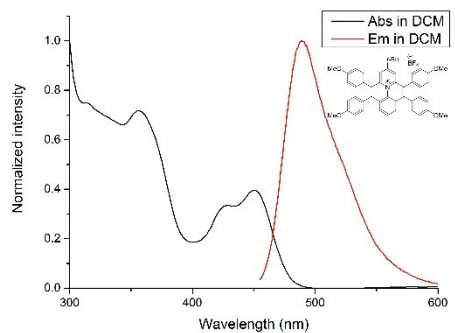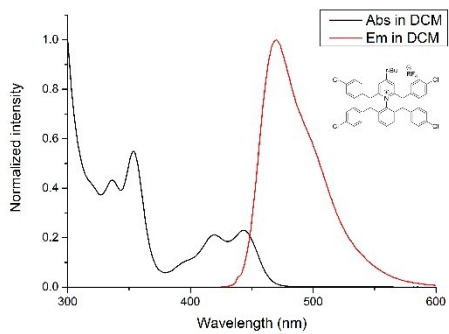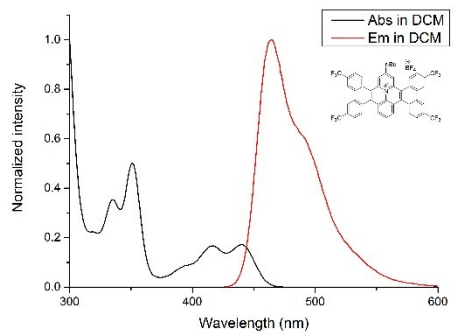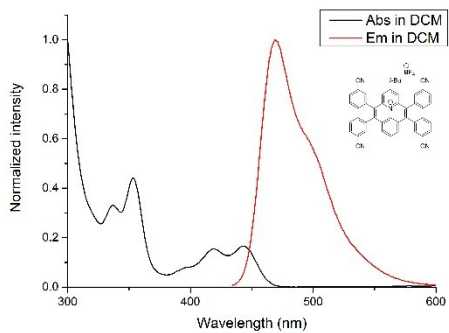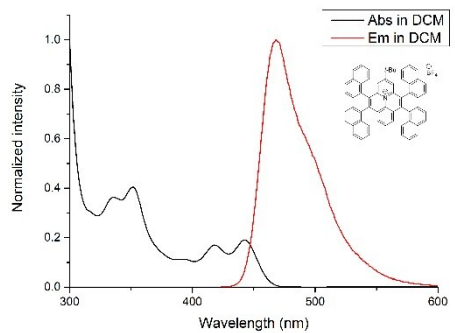

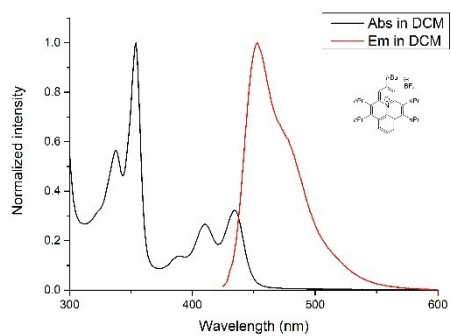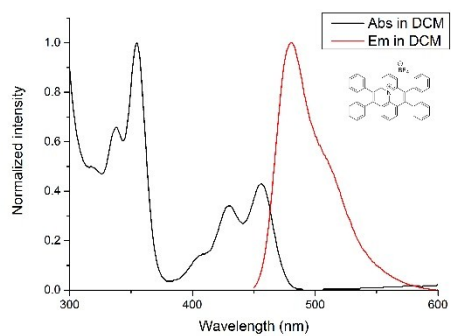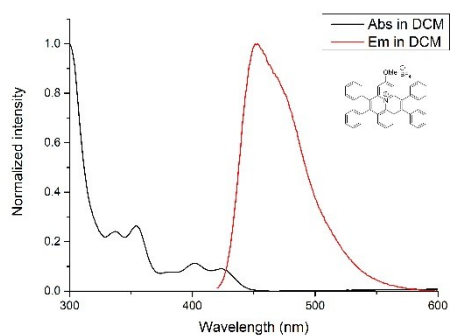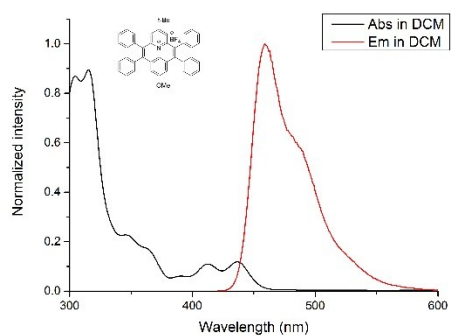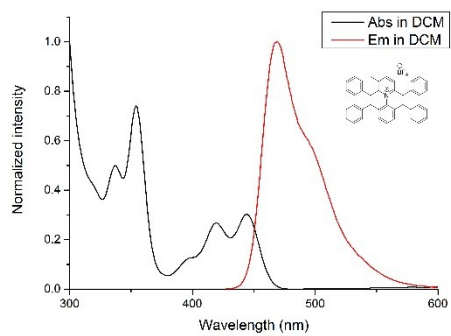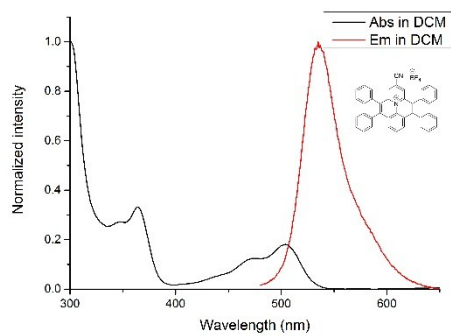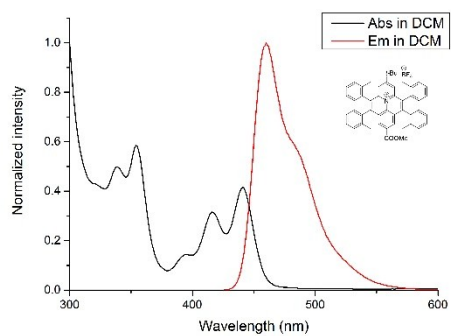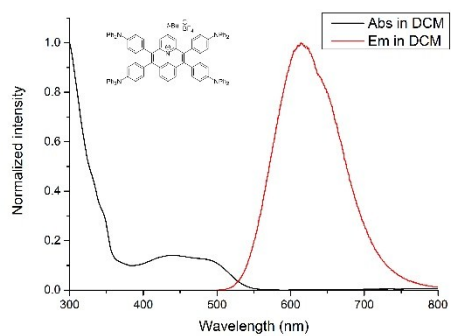

## VIII. Single crystal X-Ray structure

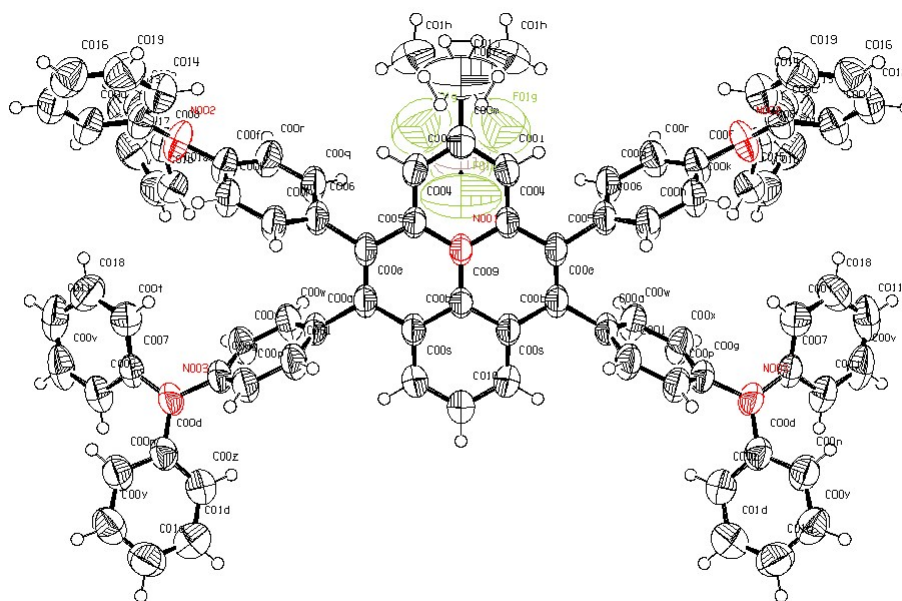

Figure S1 X-Ray single crystal structure of 4s

## XI. References

- (1) (a) M. J. Mio, L. C. Kople, J. B. Braun, T. L. Gadzikwa, K. L. Hull, R. G. Brisbois, C. J. Markworth, and P. A. Grieco, *Org. Lett.*, 2002, **4**, 3199; b) K. Park, G. Bae, J. Moon, J. Choe, K. H. Song, and S. Lee, *J. Org. Chem.*, 2010, **75**, 6244.
- (2) C. White, A. Yates, and P. M. Maitlis, *Inorg. Synth.*, 1992, **29**, 228.
- (3) T. Lv, Z. Wang, J. You, J. Lan, and G. Gao, *J. Org. Chem.*, 2013, **78**, 5723

## IX. Copies of NMR Spectra for Compounds

$^1\text{H}$  NMR spectra of **1a**:

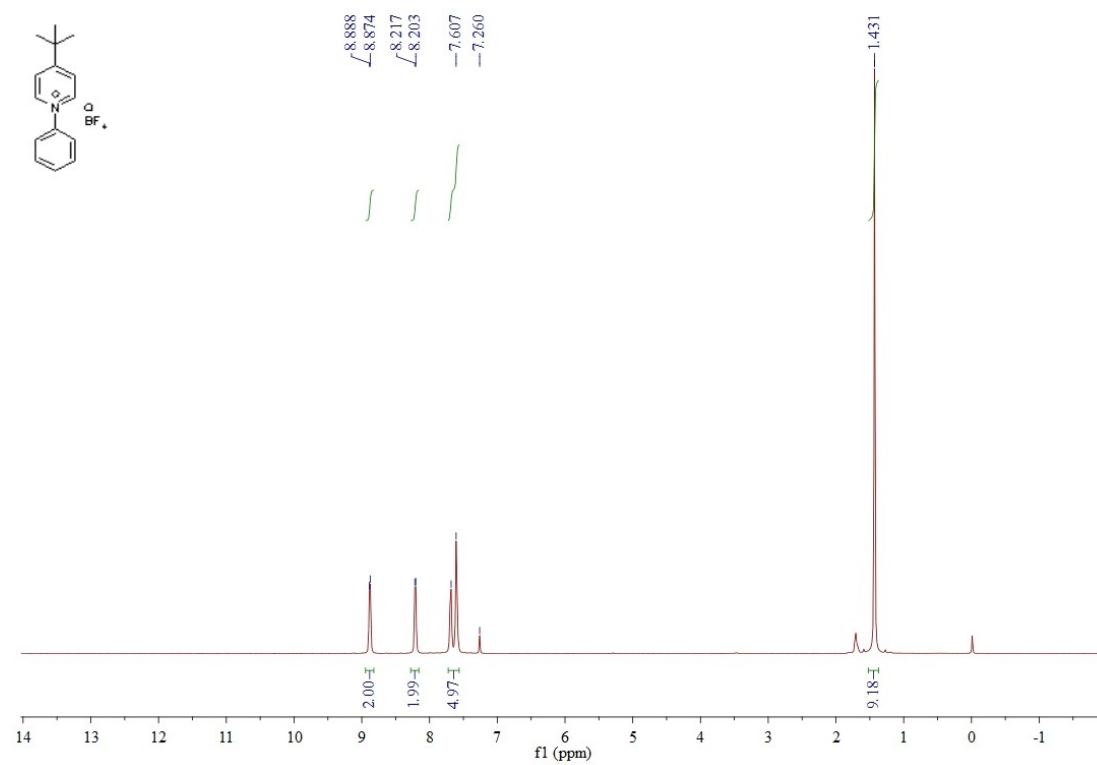

$^{13}\text{C}$  NMR spectra of **1a**:

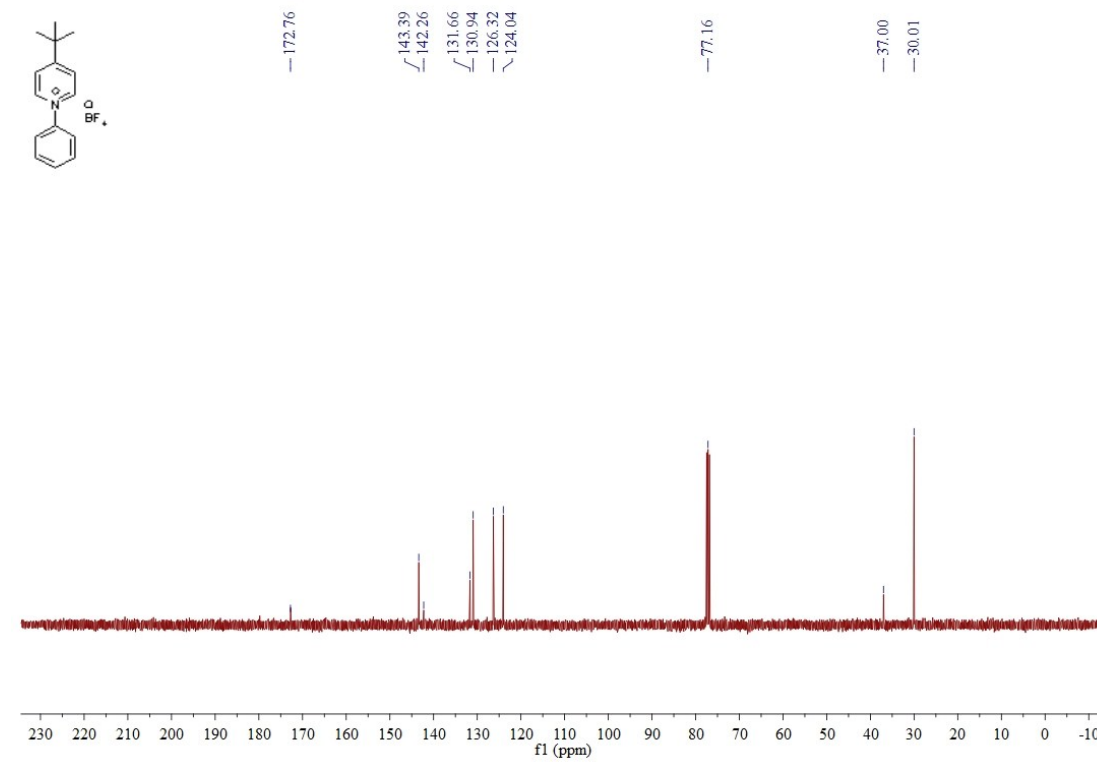



$^{19}\text{F}$  NMR spectra of **1a**:

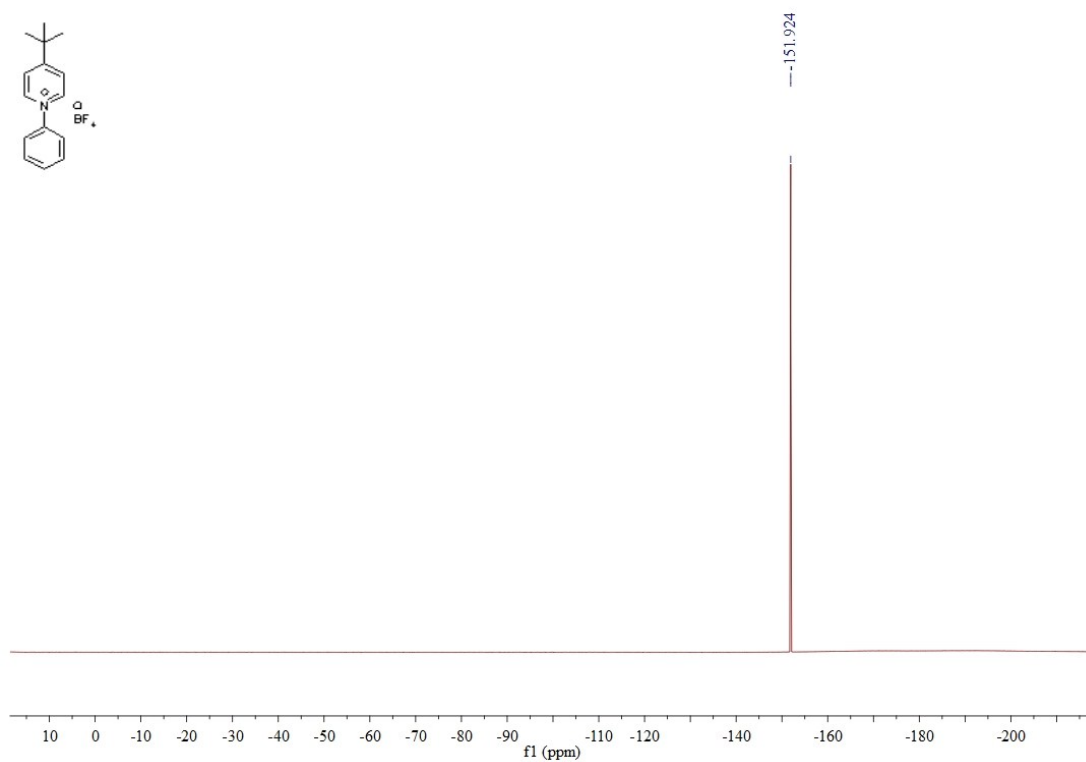

$^1\text{H}$  NMR spectra of **1a'**:

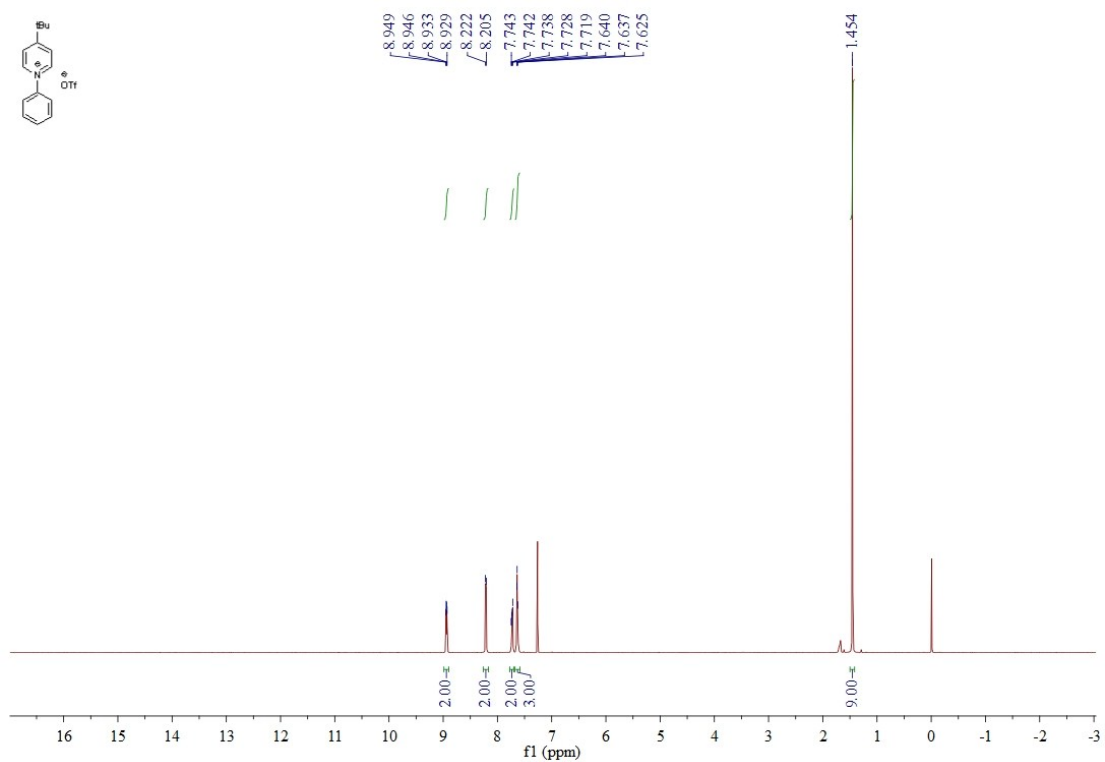

<sup>13</sup>C NMR spectra of **1a'**:

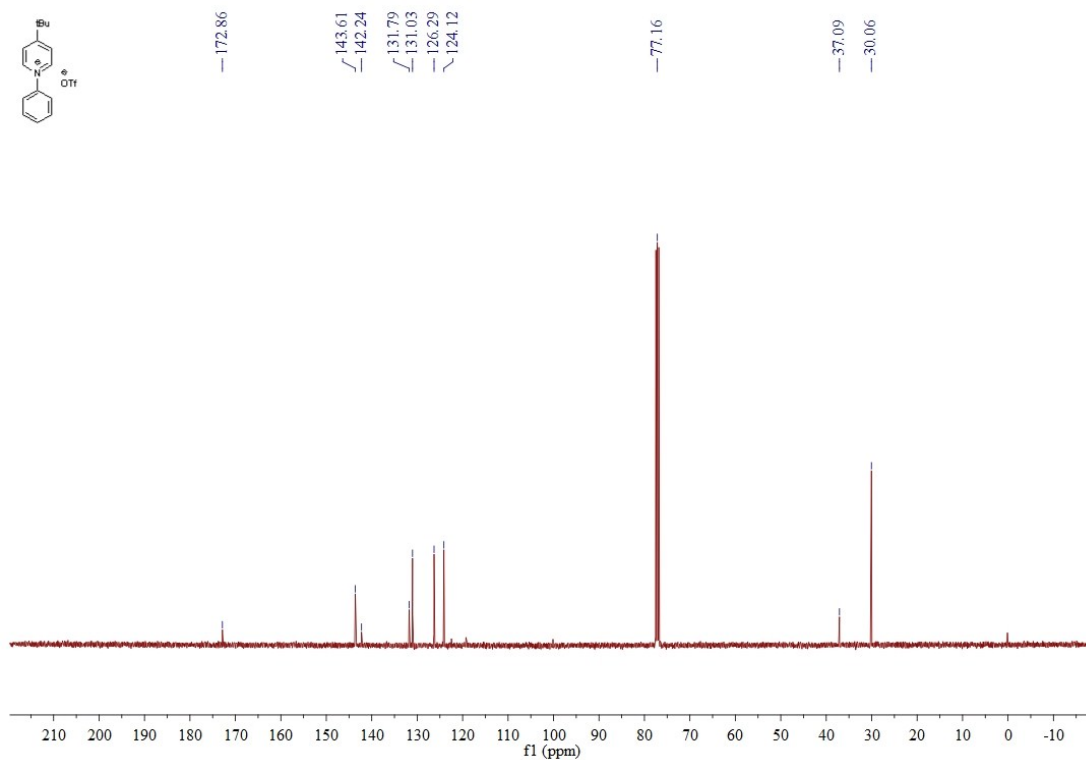

<sup>19</sup>F NMR spectra of **1a'**:

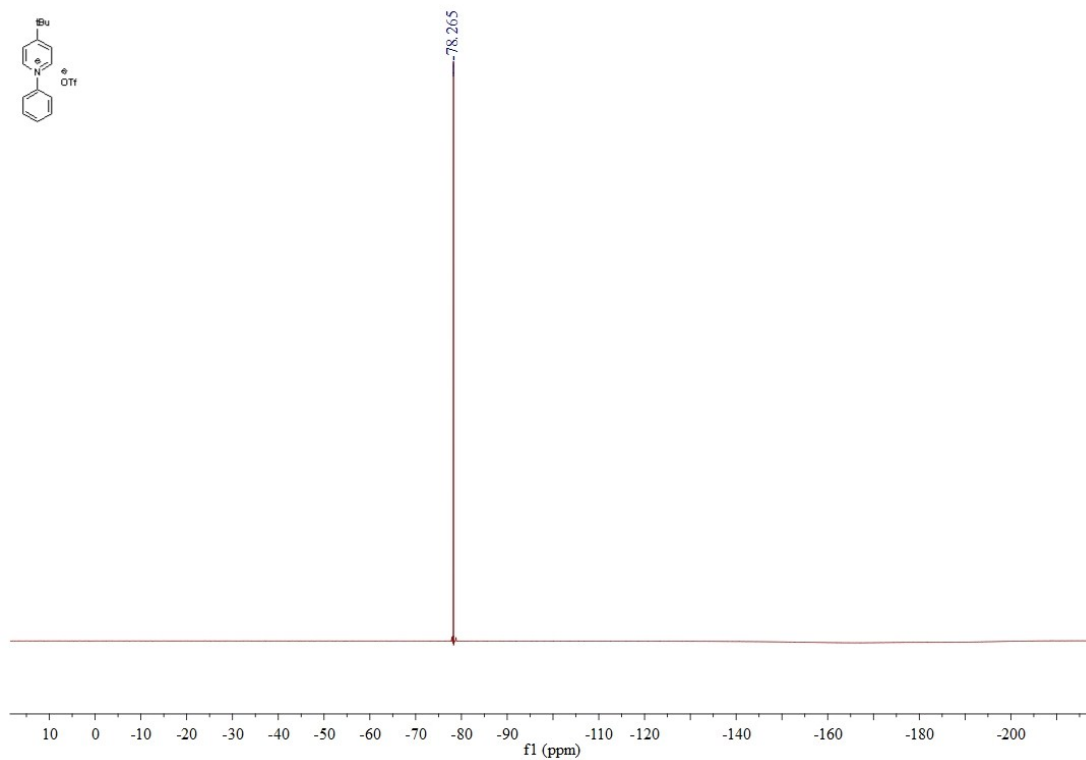

<sup>1</sup>H NMR spectra of **1b**:

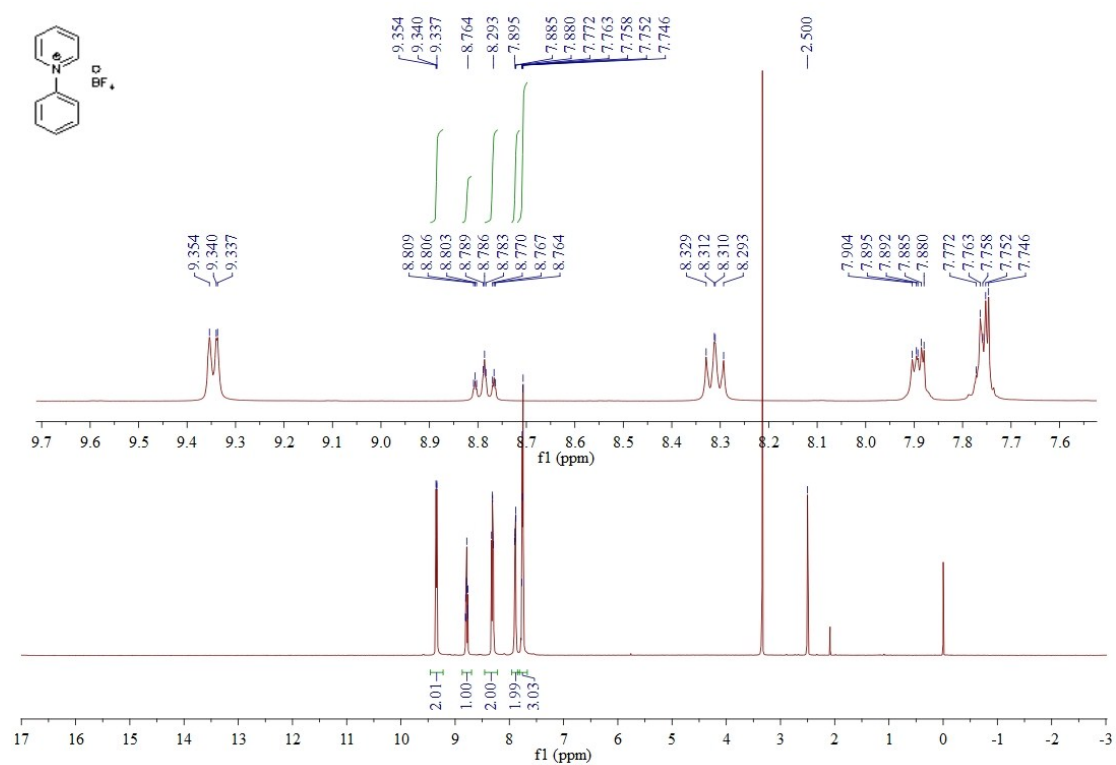

<sup>13</sup>C NMR spectra of **1b**:

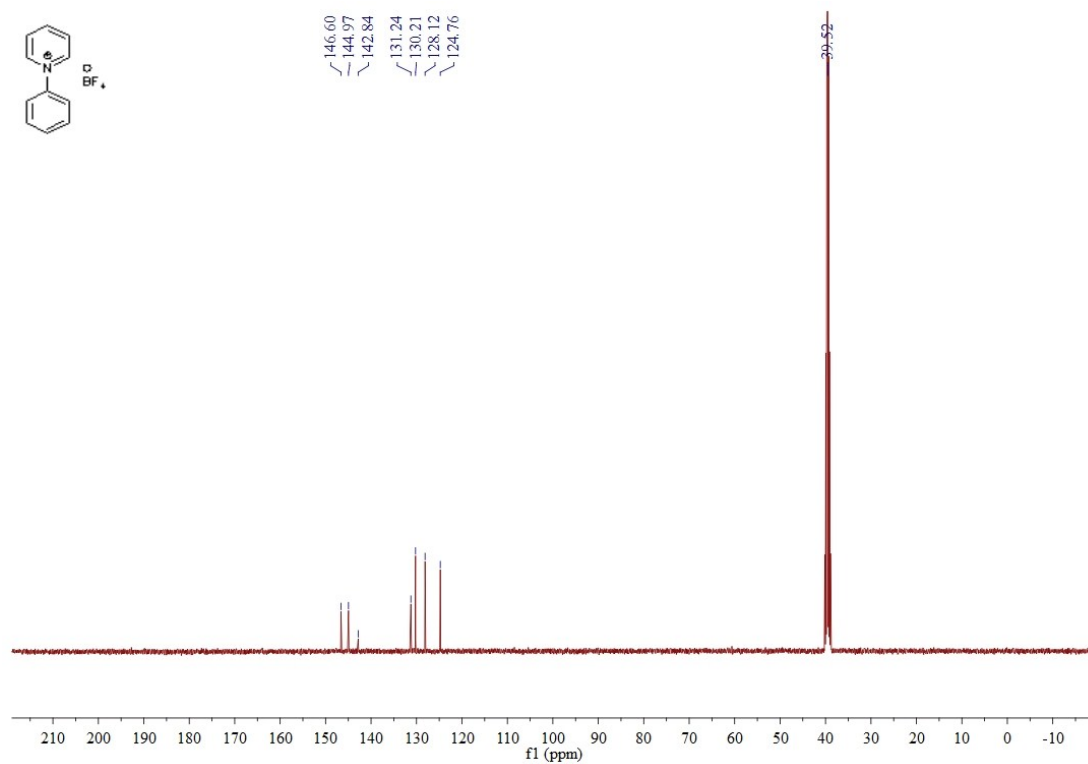

$^{19}\text{F}$  NMR spectra of **1b**:

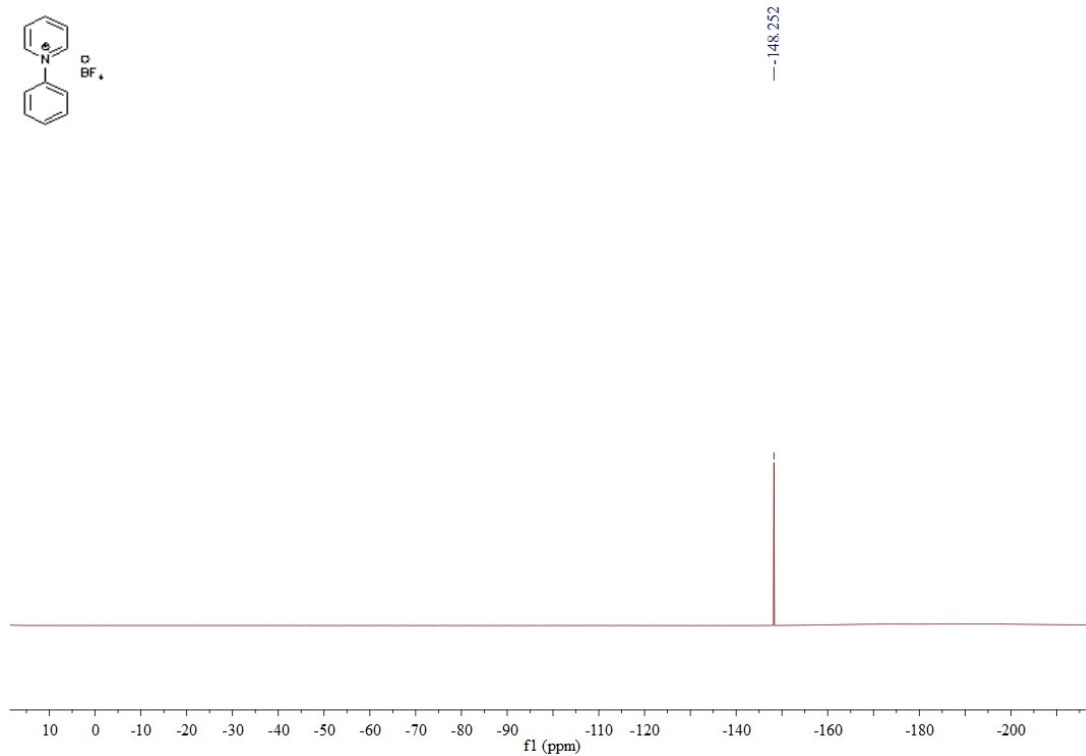

$^1\text{H}$  NMR spectra of **1c**:

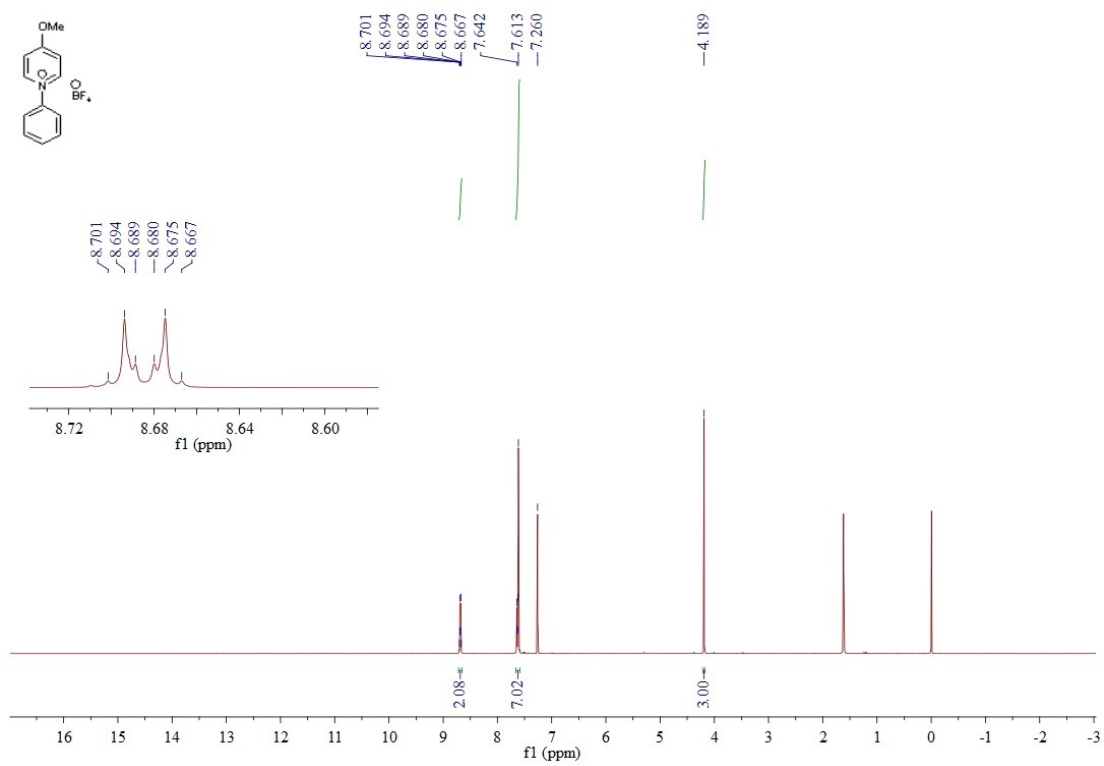

<sup>13</sup>C NMR spectra of **1c**:

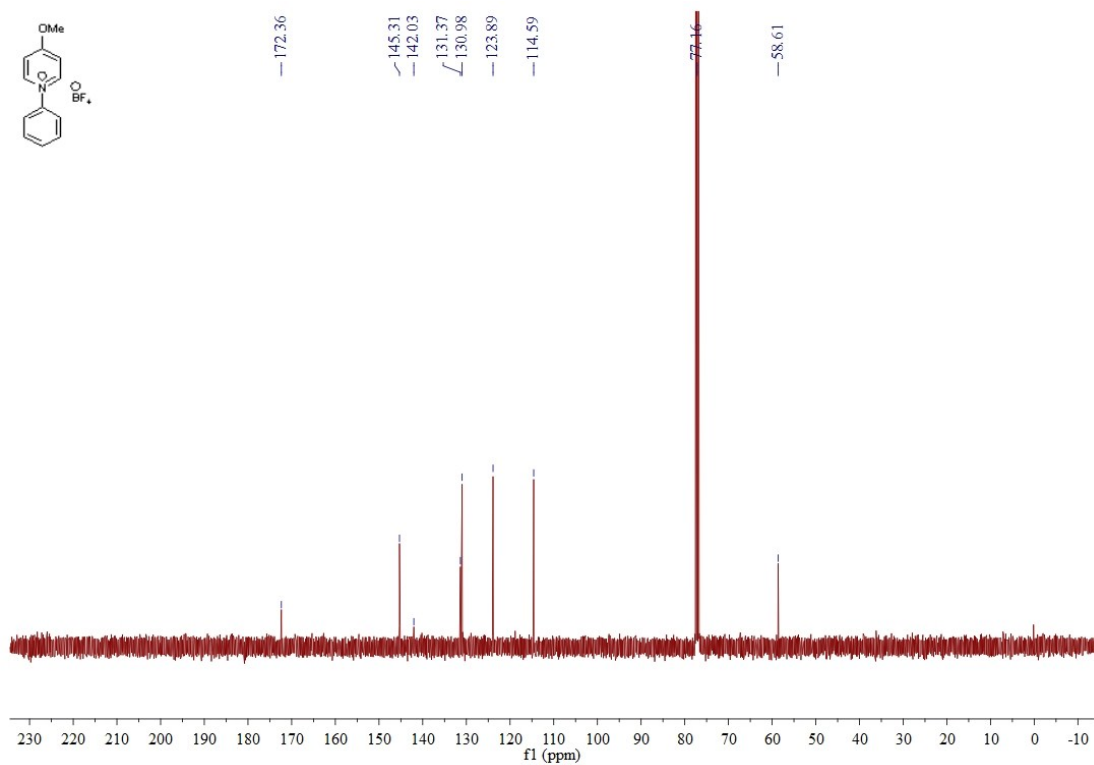

<sup>19</sup>F NMR spectra of **1c**:

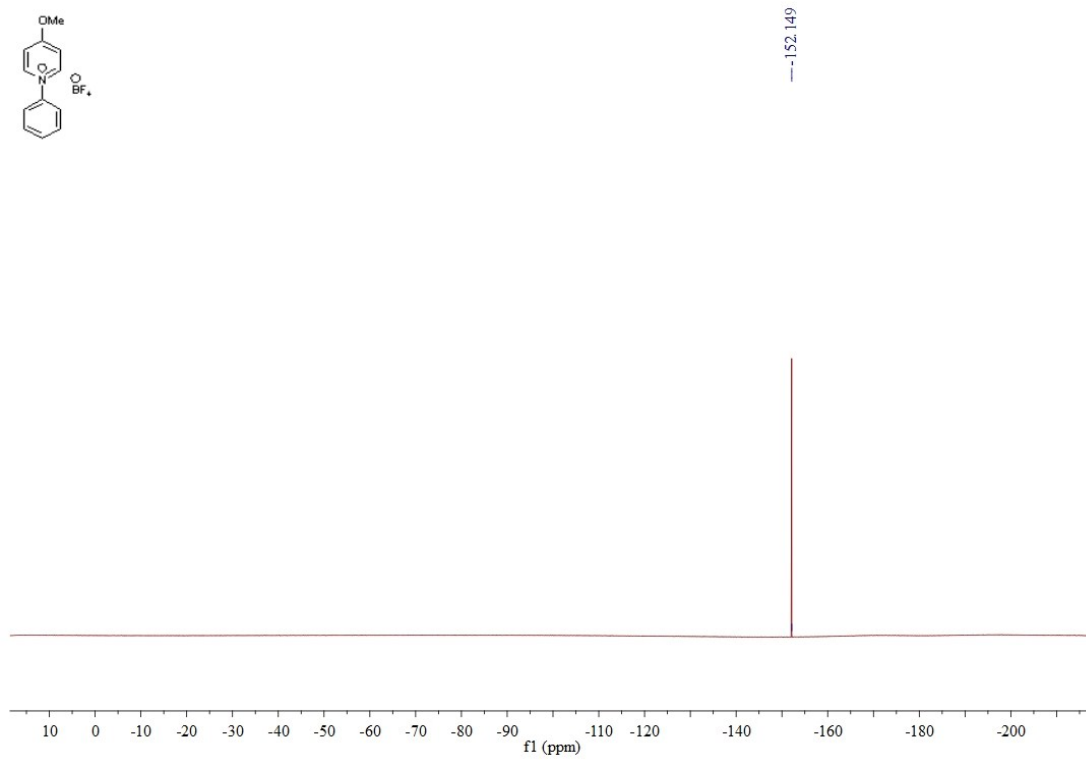

<sup>1</sup>H NMR spectra of **1d**:

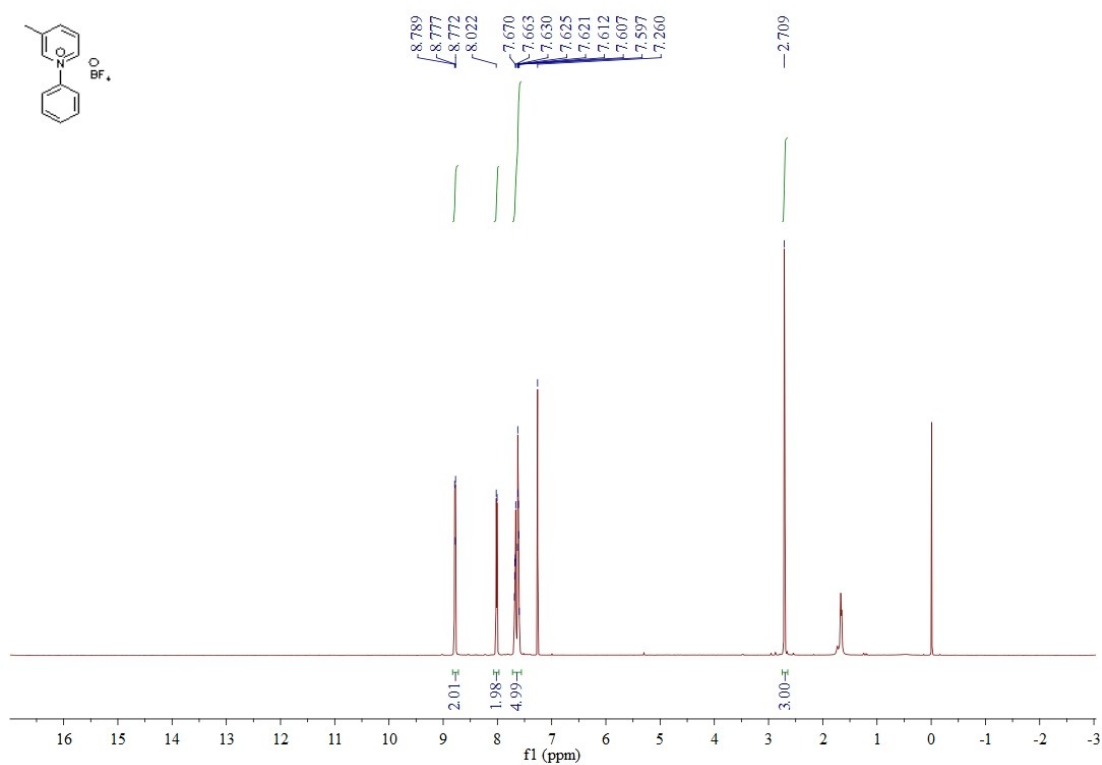

<sup>13</sup>C NMR spectra of **1d**:

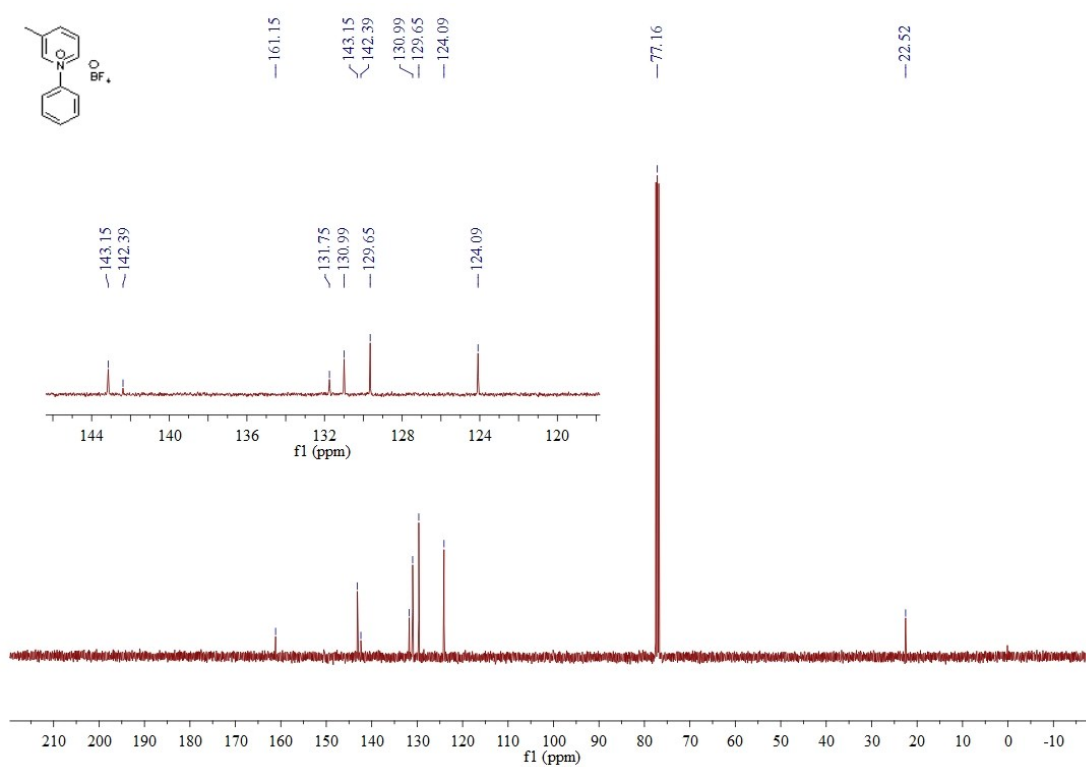

<sup>19</sup>F NMR spectra of **1d**:

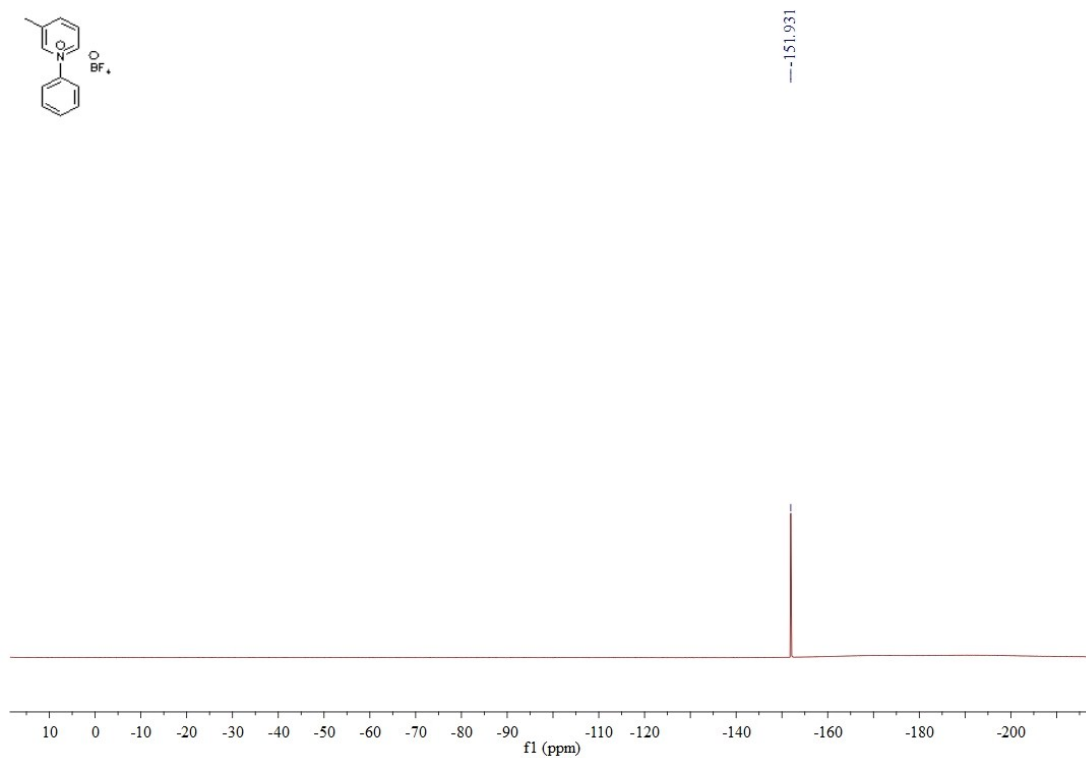

<sup>1</sup>H NMR spectra of **1e**:

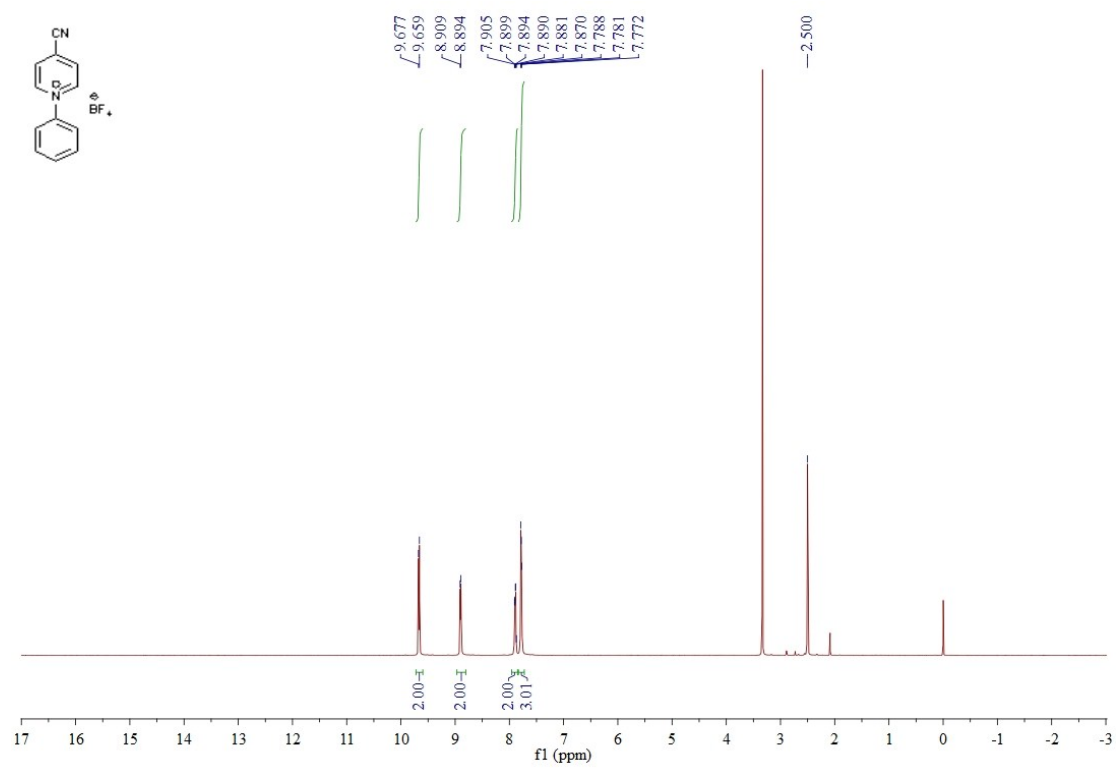

<sup>13</sup>C NMR spectra of **1e**:

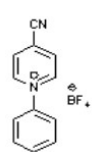

— 146.37  
— 142.46  
— 131.86  
— 130.98  
— 130.28  
— 127.64  
— 124.83  
— 114.80

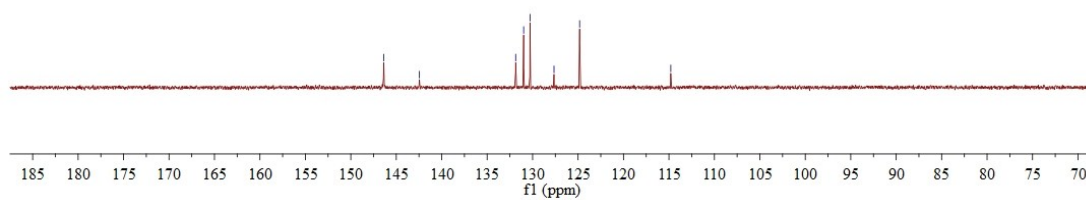

<sup>19</sup>F NMR spectra of **1e**:

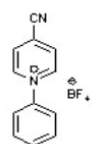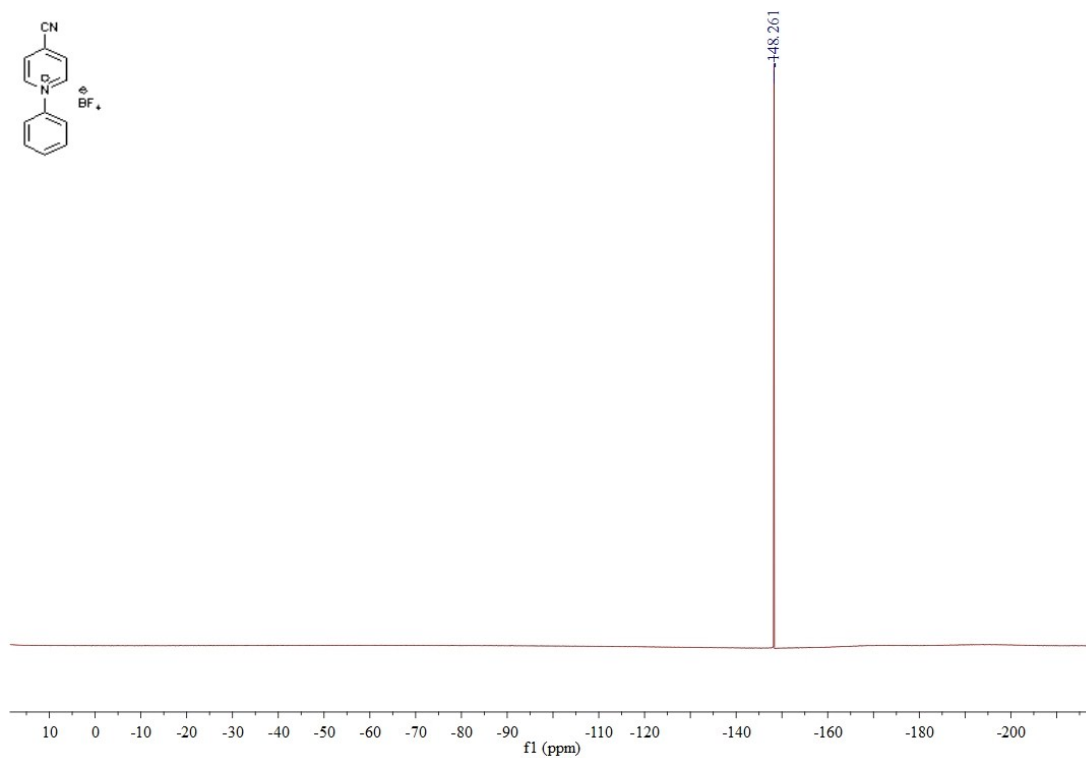



### <sup>1</sup>H NMR spectra of **1f**:

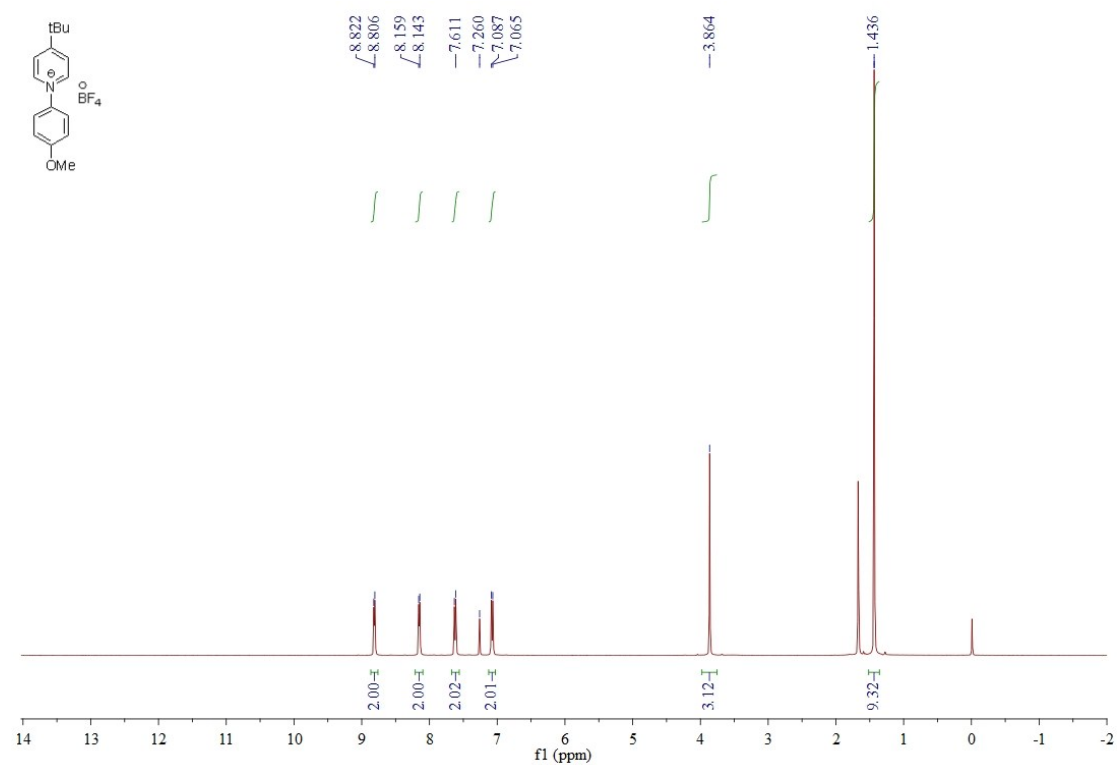

### <sup>13</sup>C NMR spectra of **1f**:

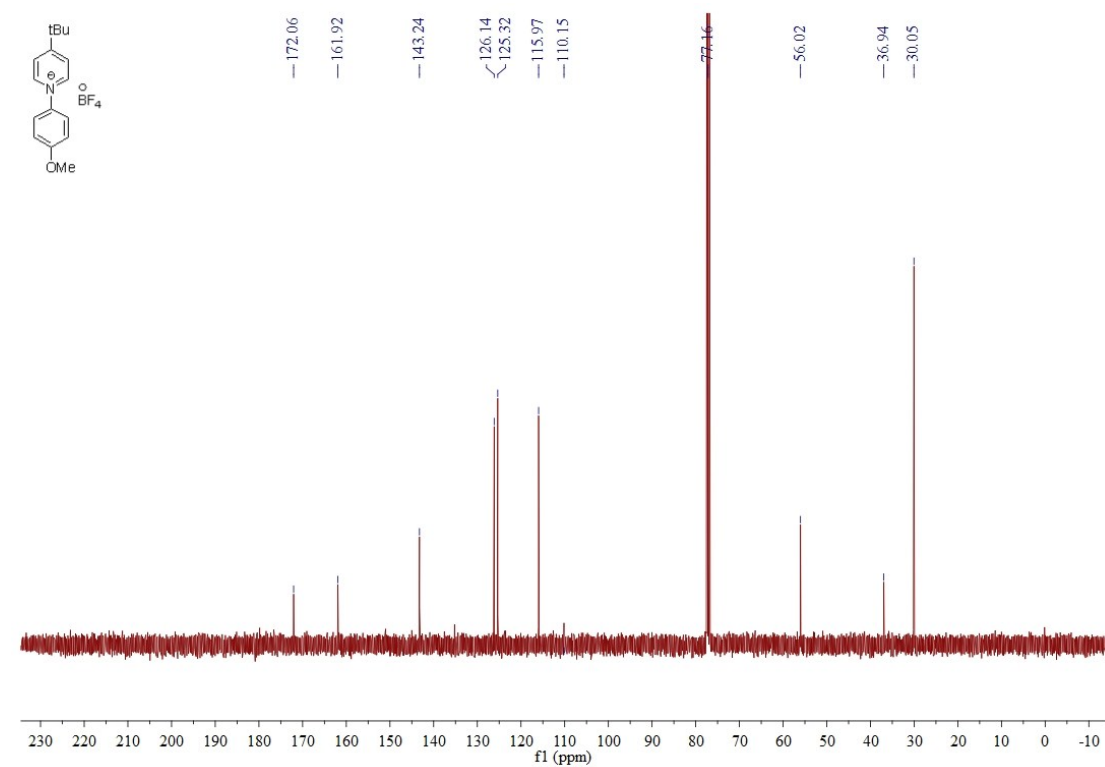

$^{19}\text{F}$  NMR spectra of **1f**:

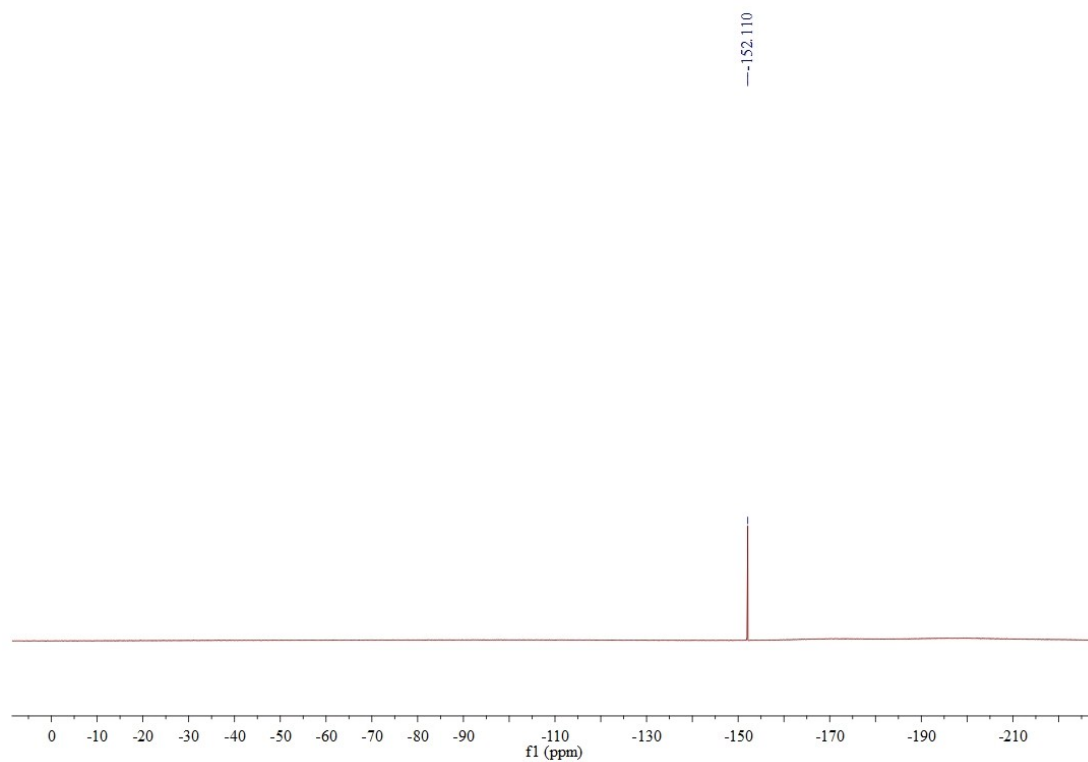

$^1\text{H}$  NMR spectra of **1g**:

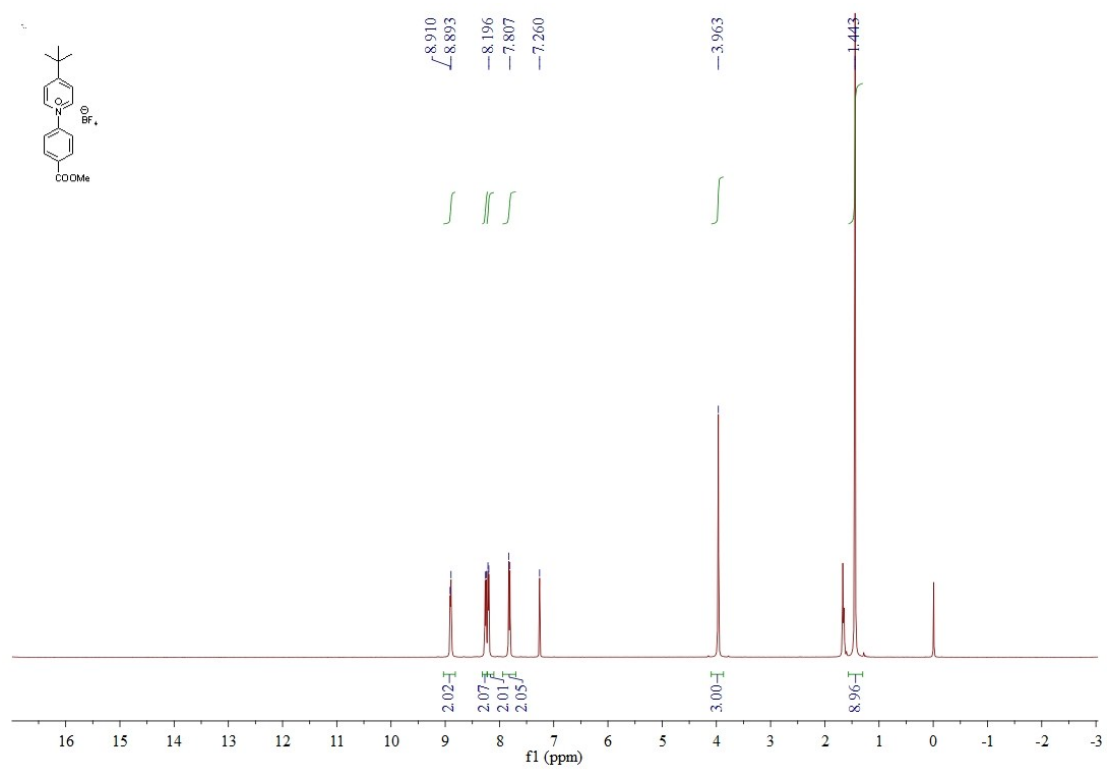

<sup>13</sup>C NMR spectra of **1g**:

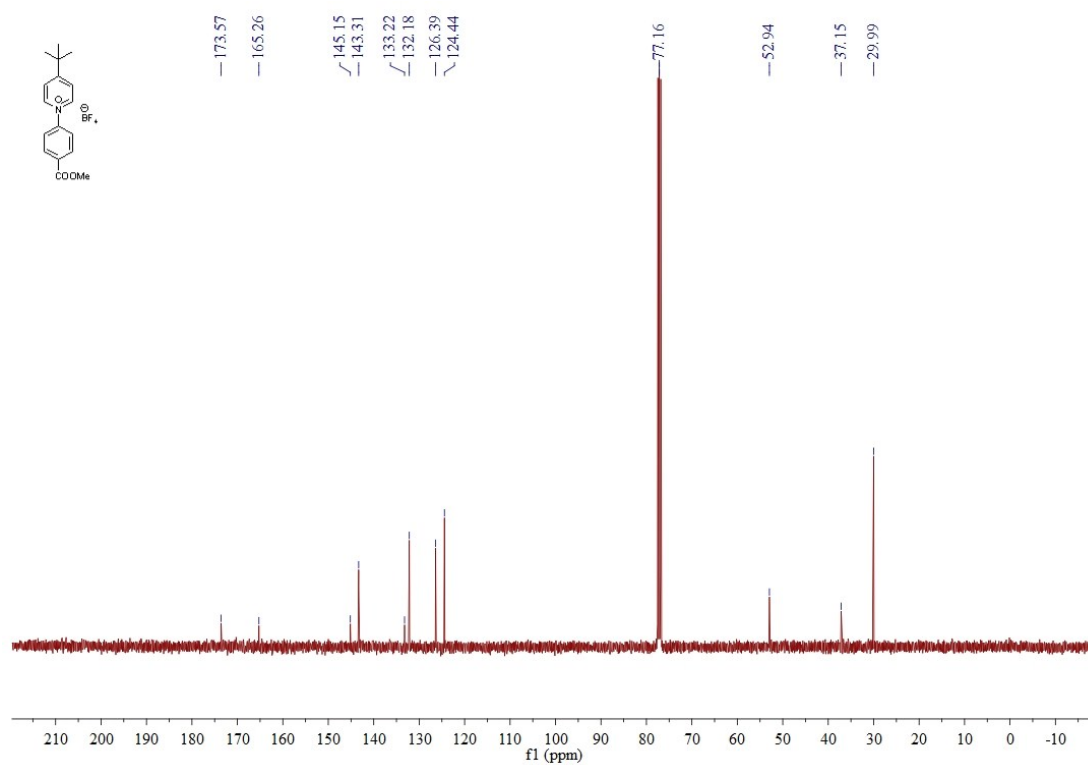

<sup>19</sup>F NMR spectra of **1g**:

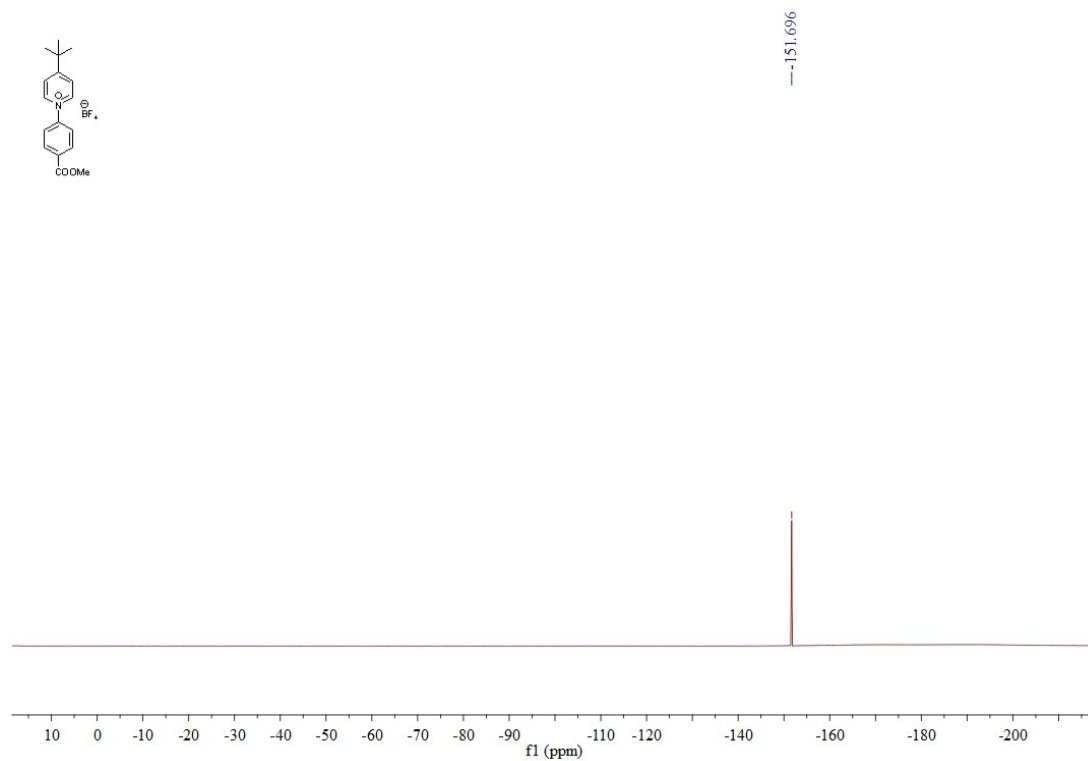

<sup>1</sup>H NMR spectra of **3a**:

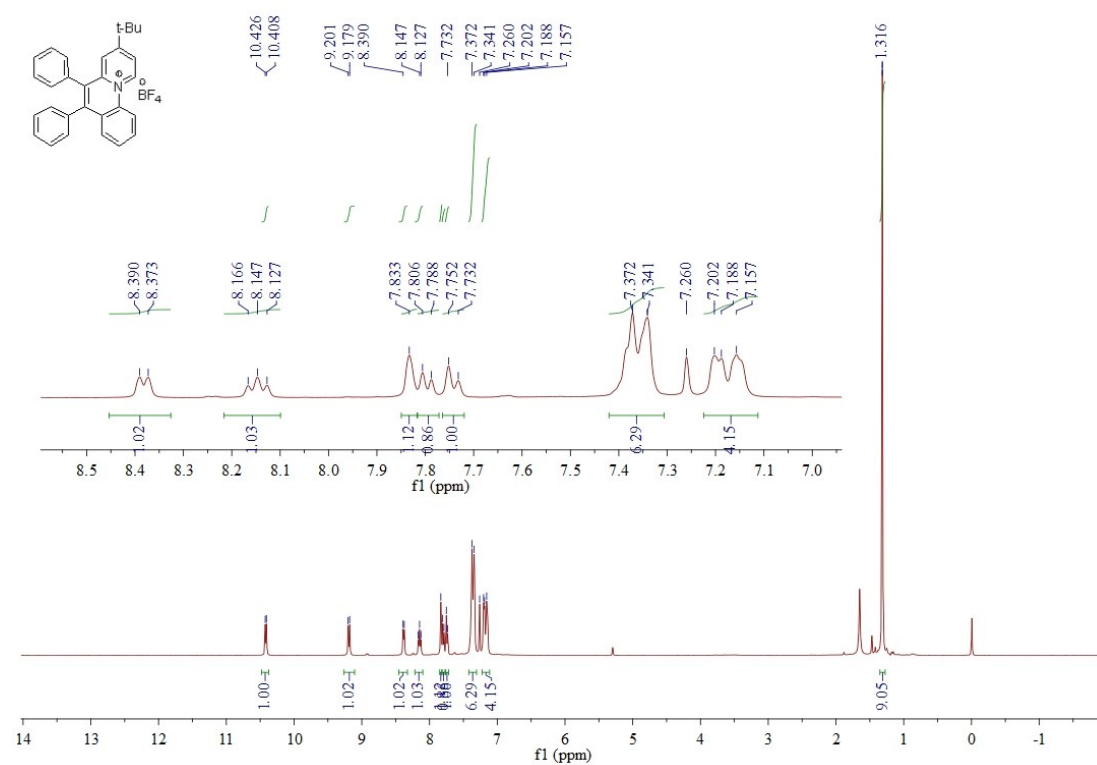

<sup>13</sup>C NMR spectra of **3a**:

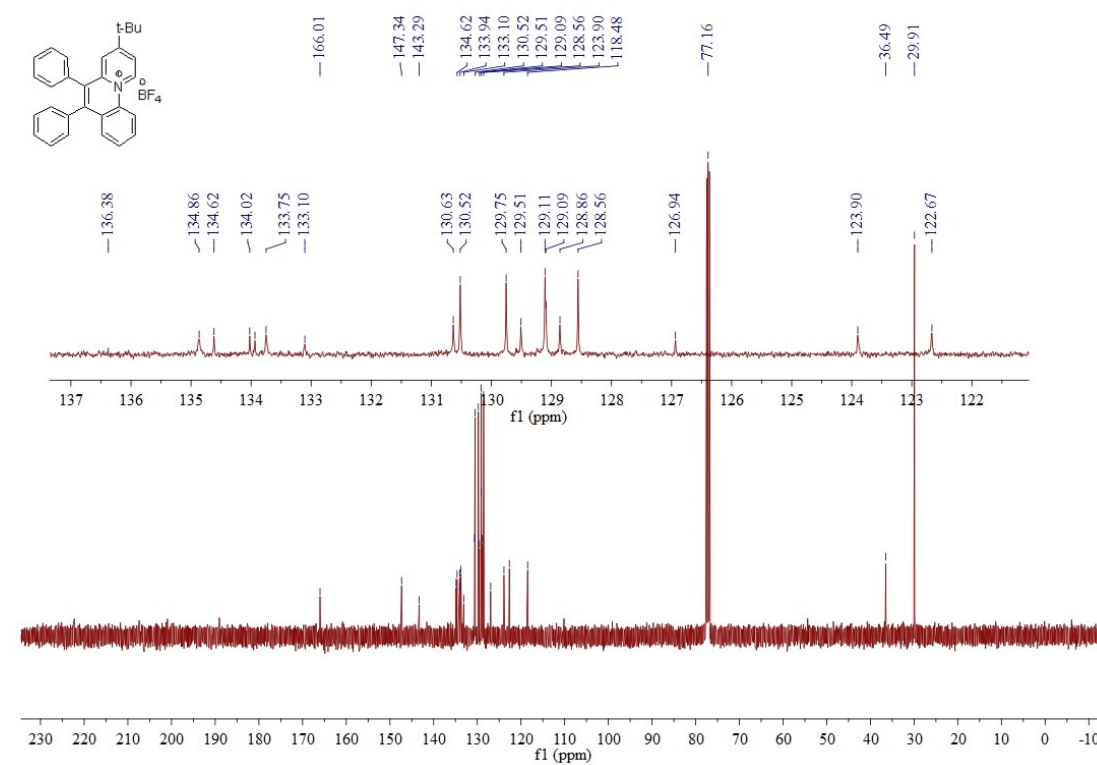

<sup>19</sup>F NMR spectra of **3a**:

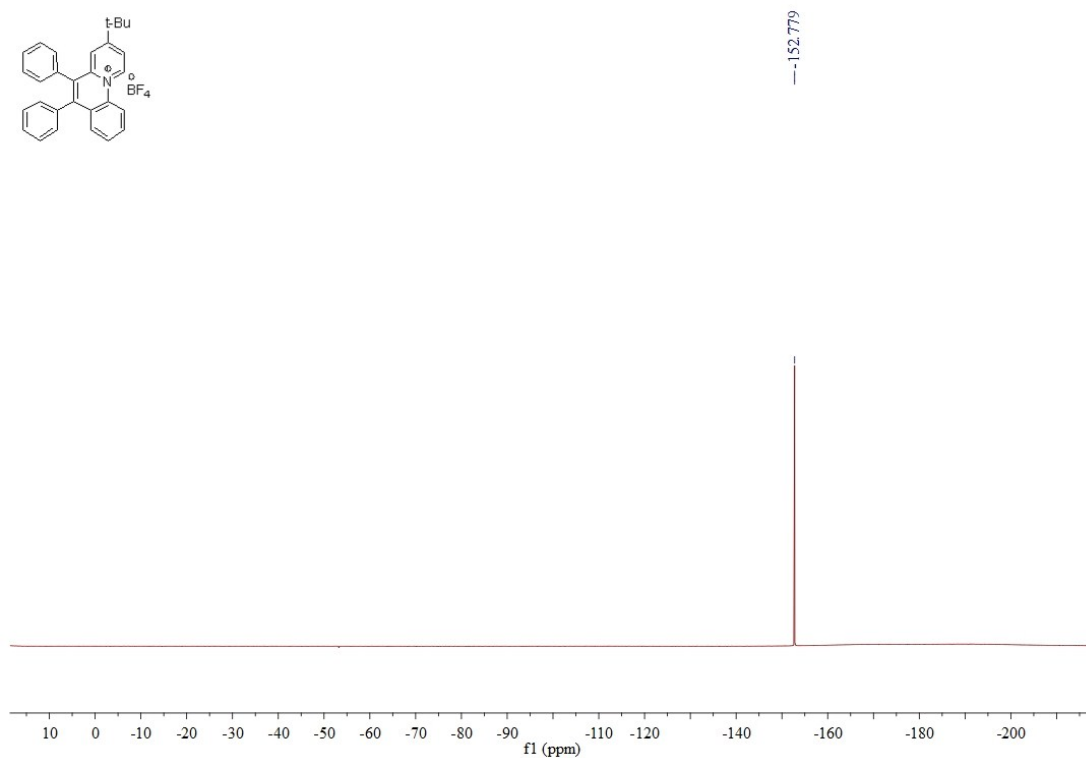

<sup>1</sup>H NMR spectra of **4a**:

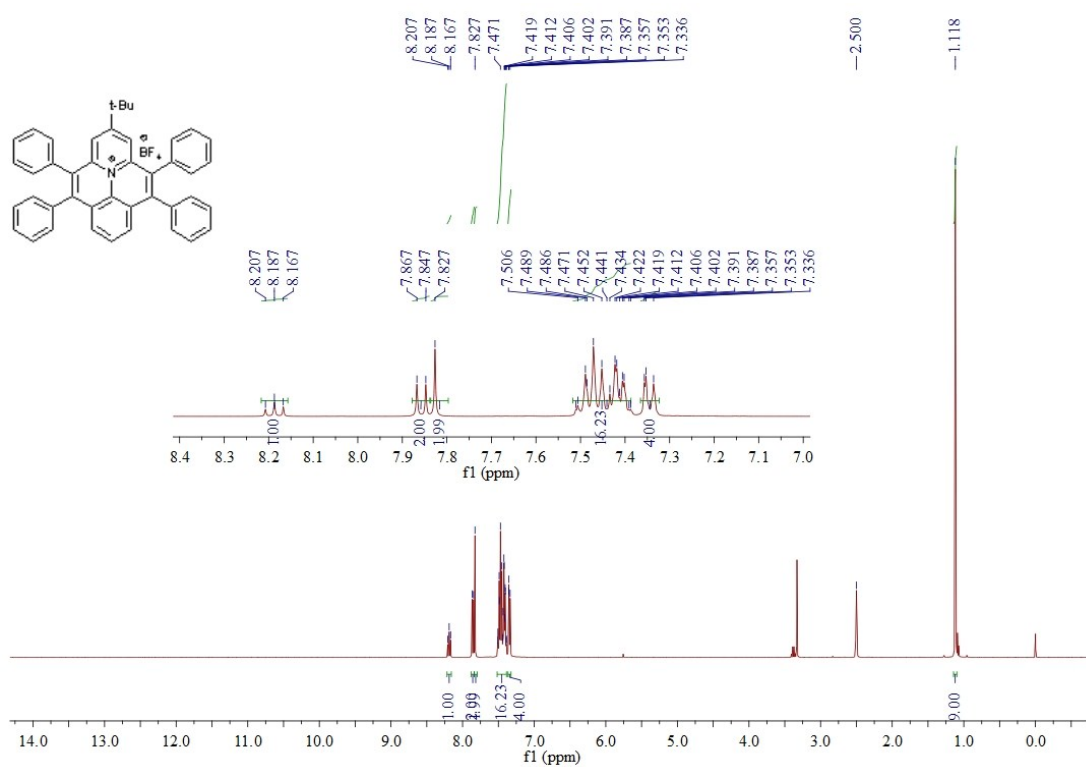

<sup>13</sup>C NMR spectra of **4a**:

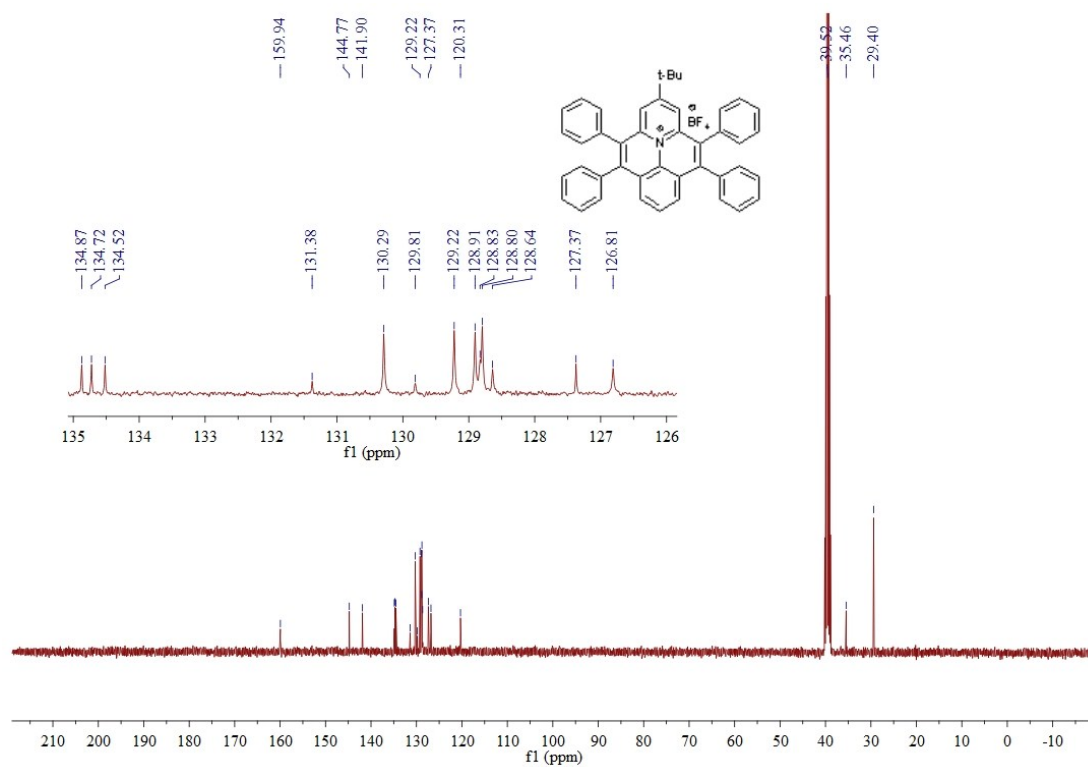

<sup>19</sup>F NMR spectra of **4a**:

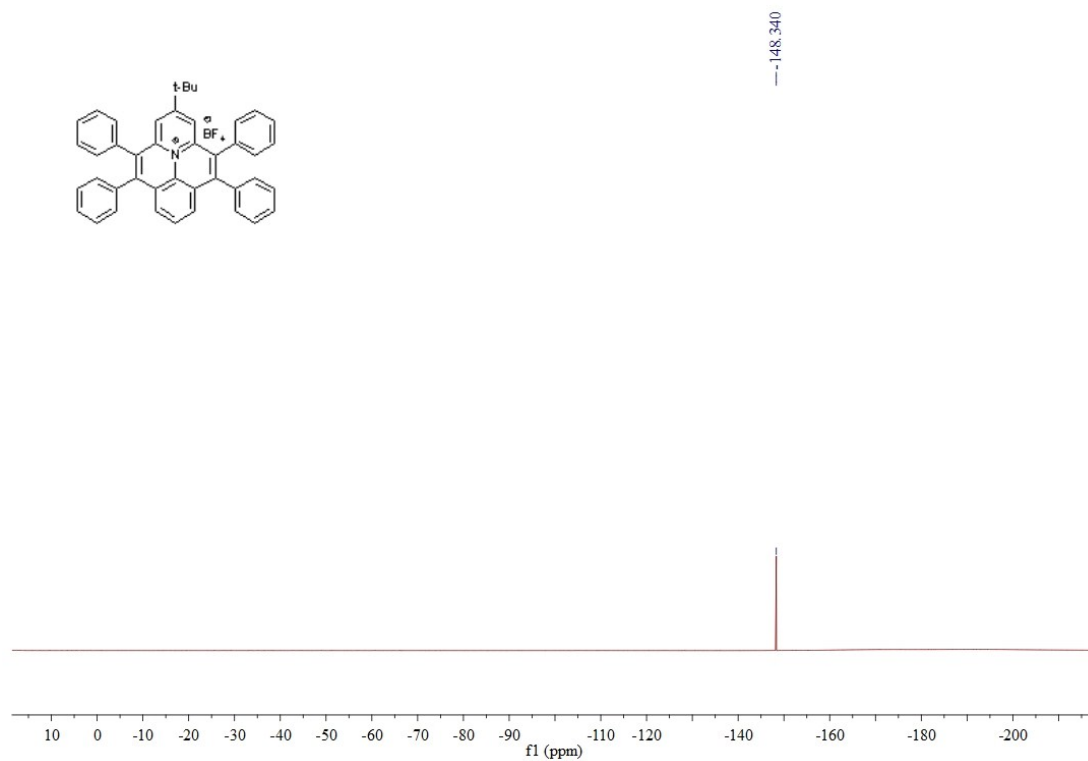

<sup>1</sup>H NMR spectra of **4a'**:

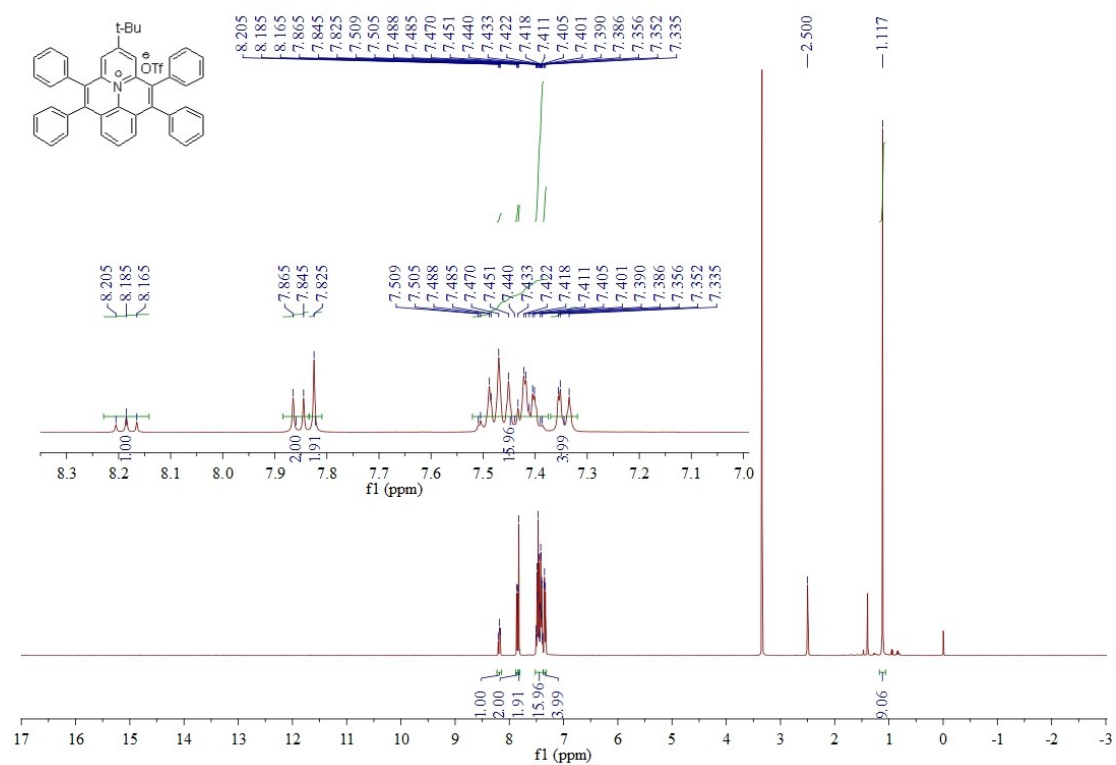

<sup>13</sup>C NMR spectra of **4a'**:

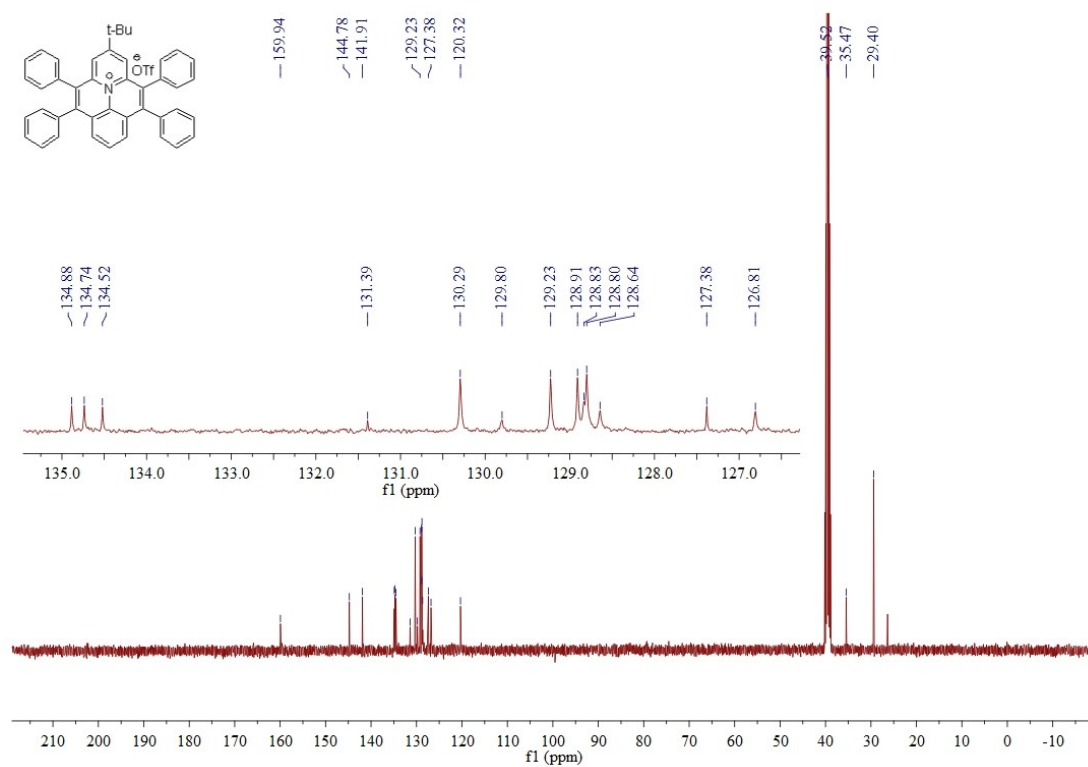

$^{19}\text{F}$  NMR spectra of **4a'**:

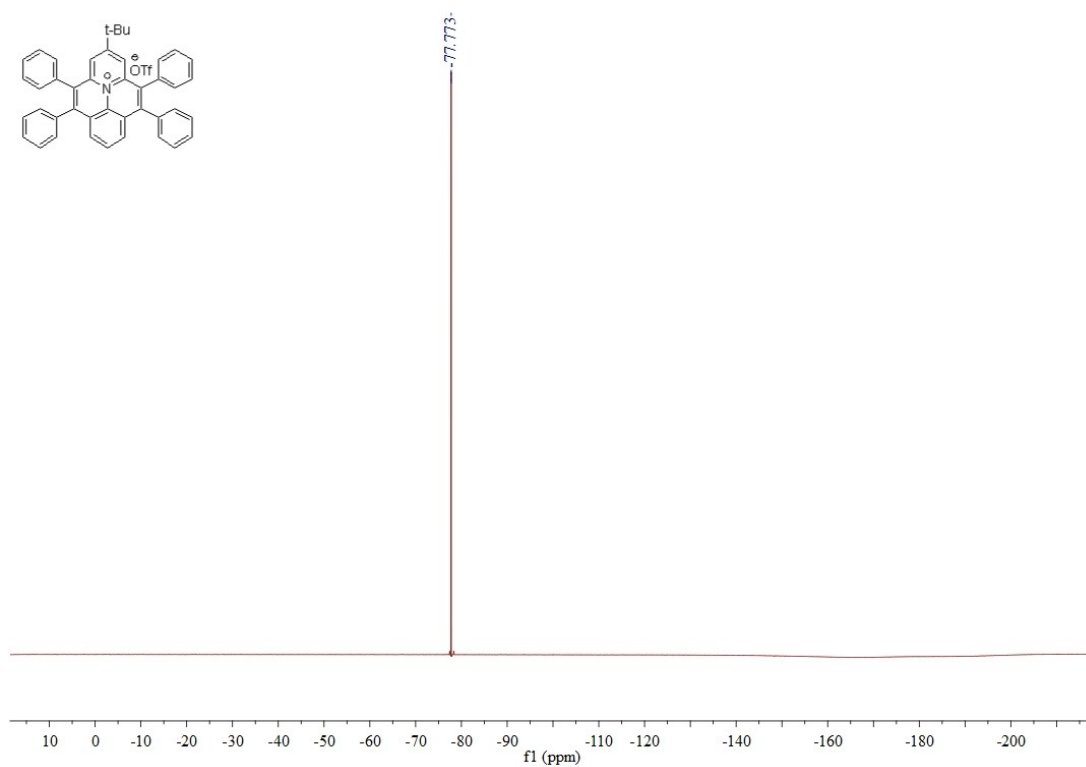

$^1\text{H}$  NMR spectra of **4b**:

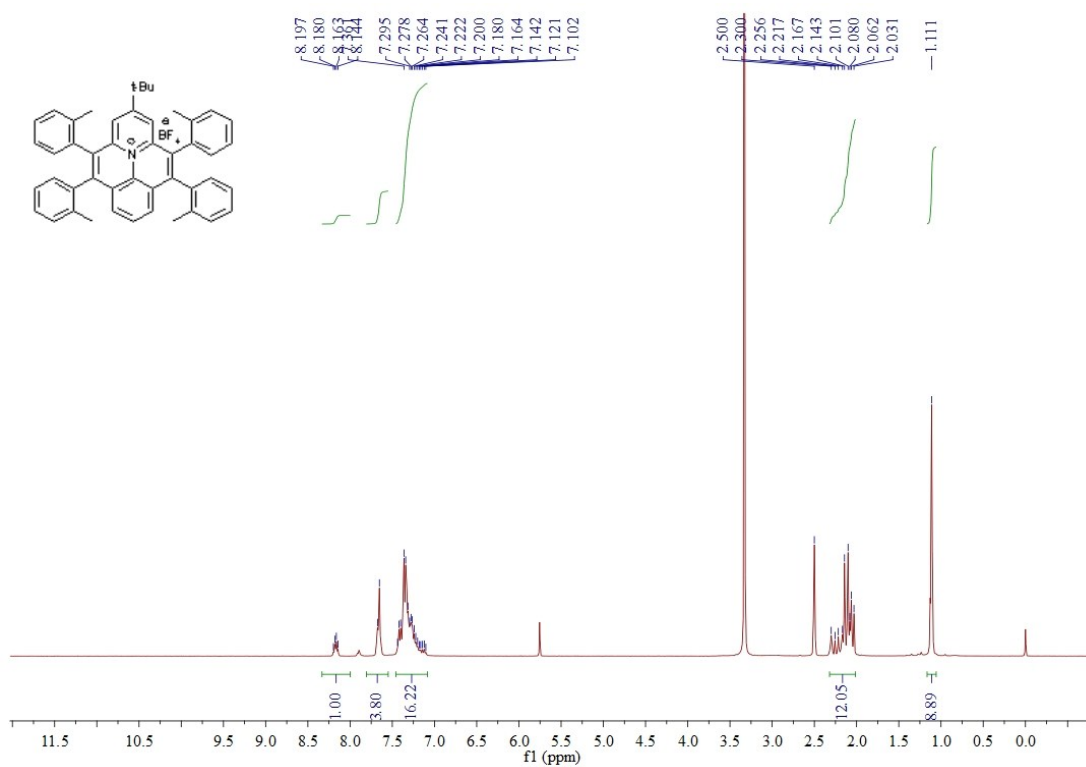



<sup>13</sup>C NMR spectra of **4b**:

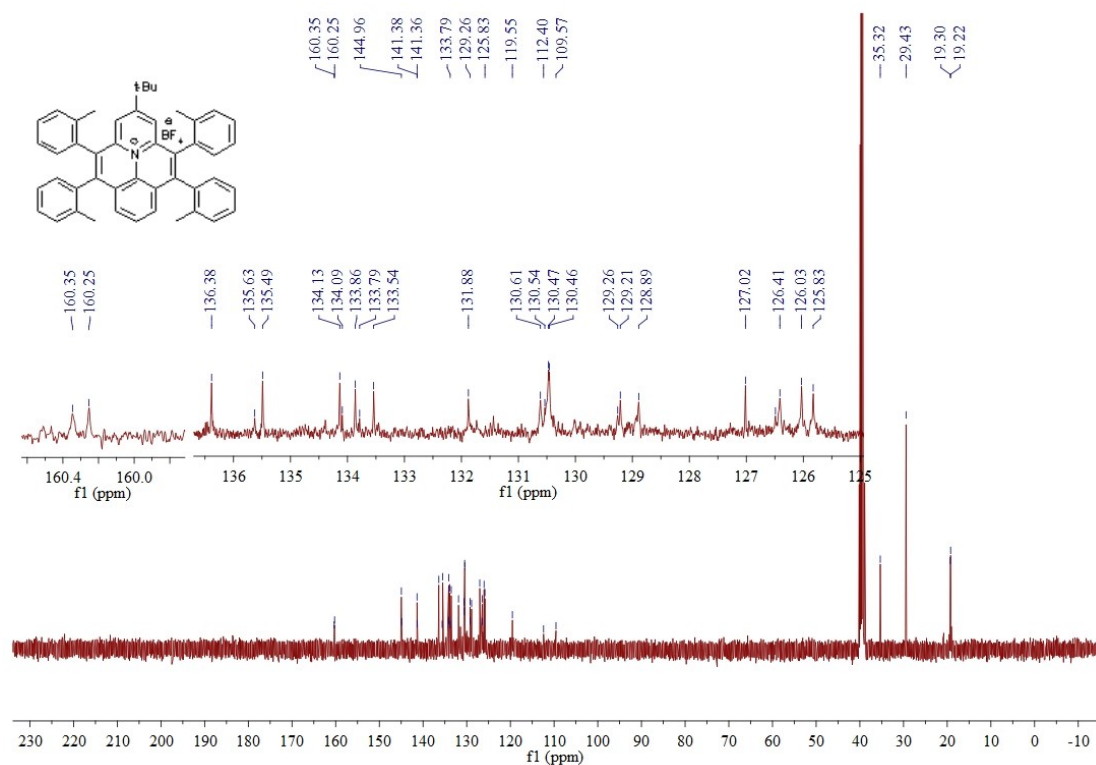

<sup>1</sup>H NMR spectra of **4c**:

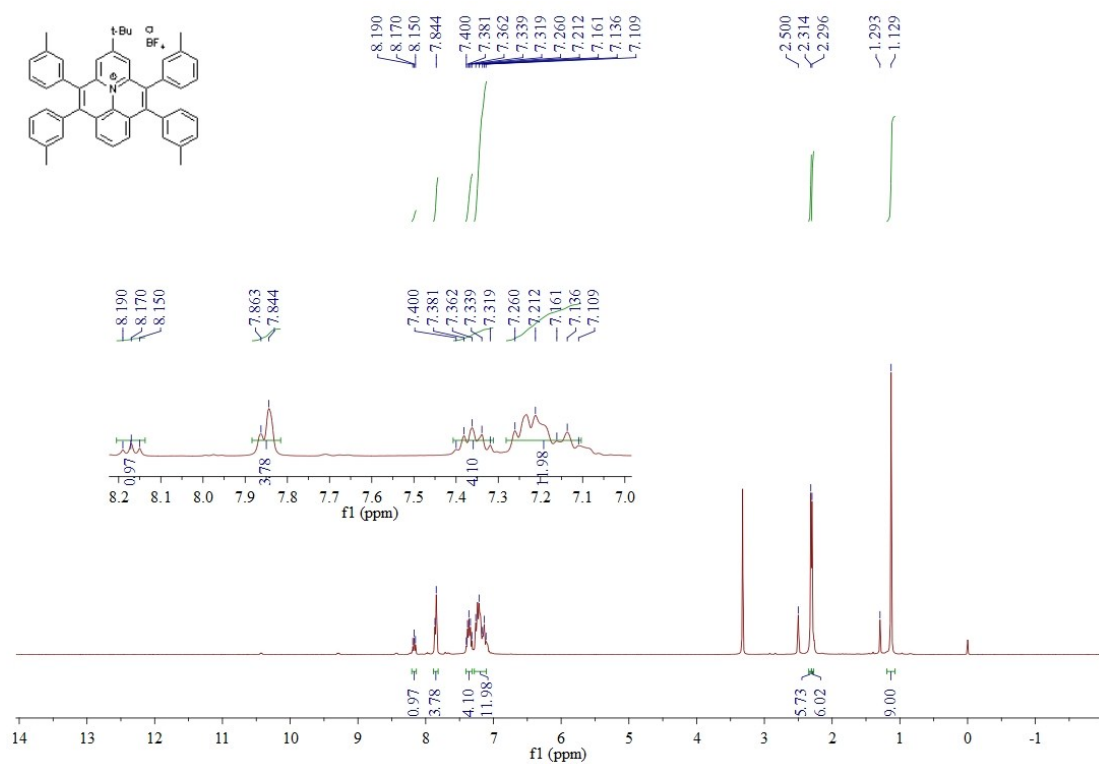

$^{13}\text{C}$  NMR spectra of **4c**:

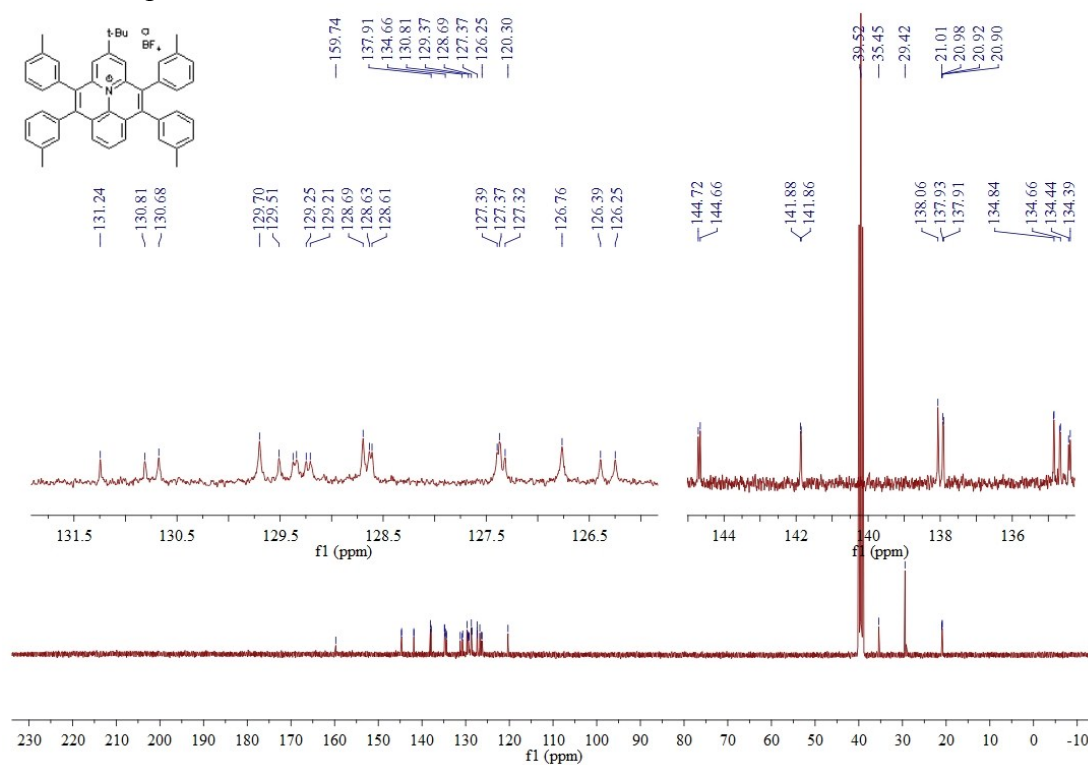

$^1\text{H}$  NMR spectra of **4d**:

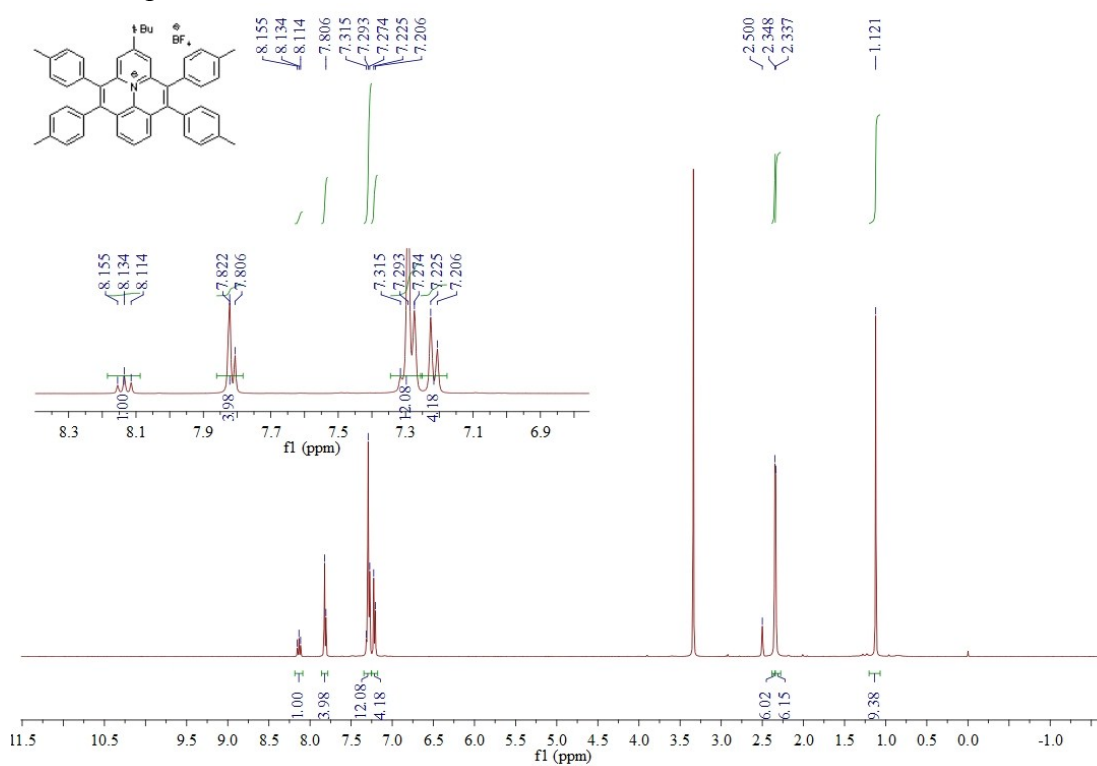

<sup>13</sup>C NMR spectra of **4d**:

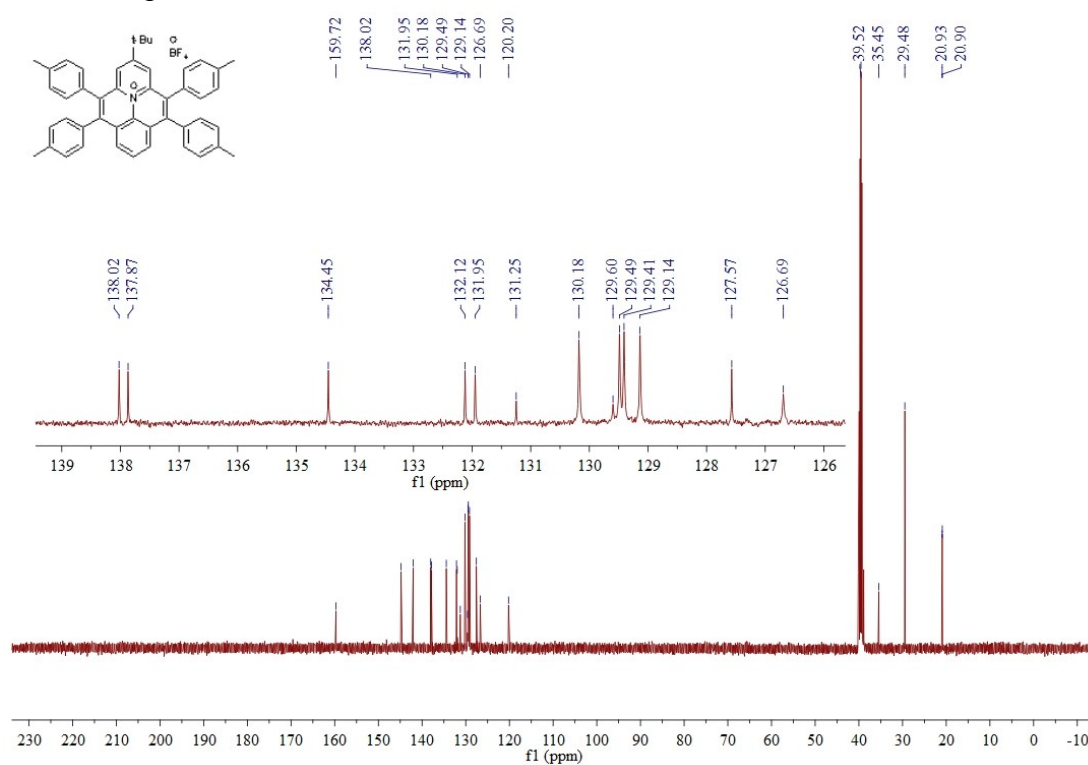

<sup>1</sup>H NMR spectra of **4e**:

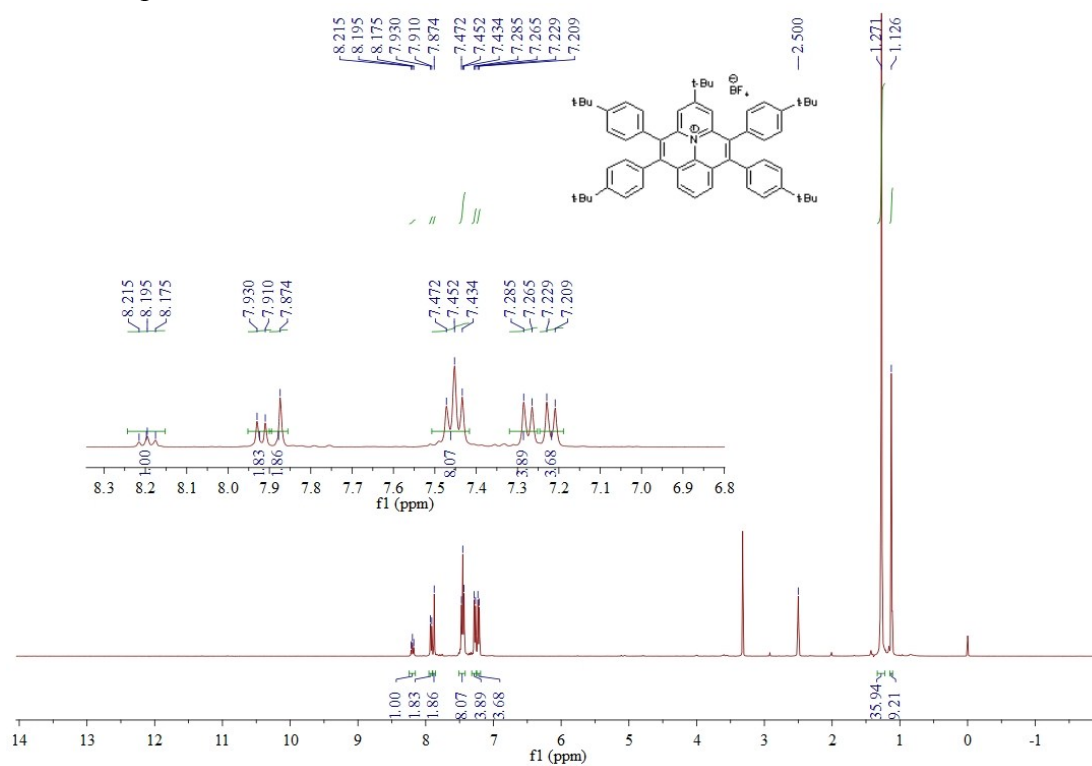

<sup>13</sup>C NMR spectra of **4e**:

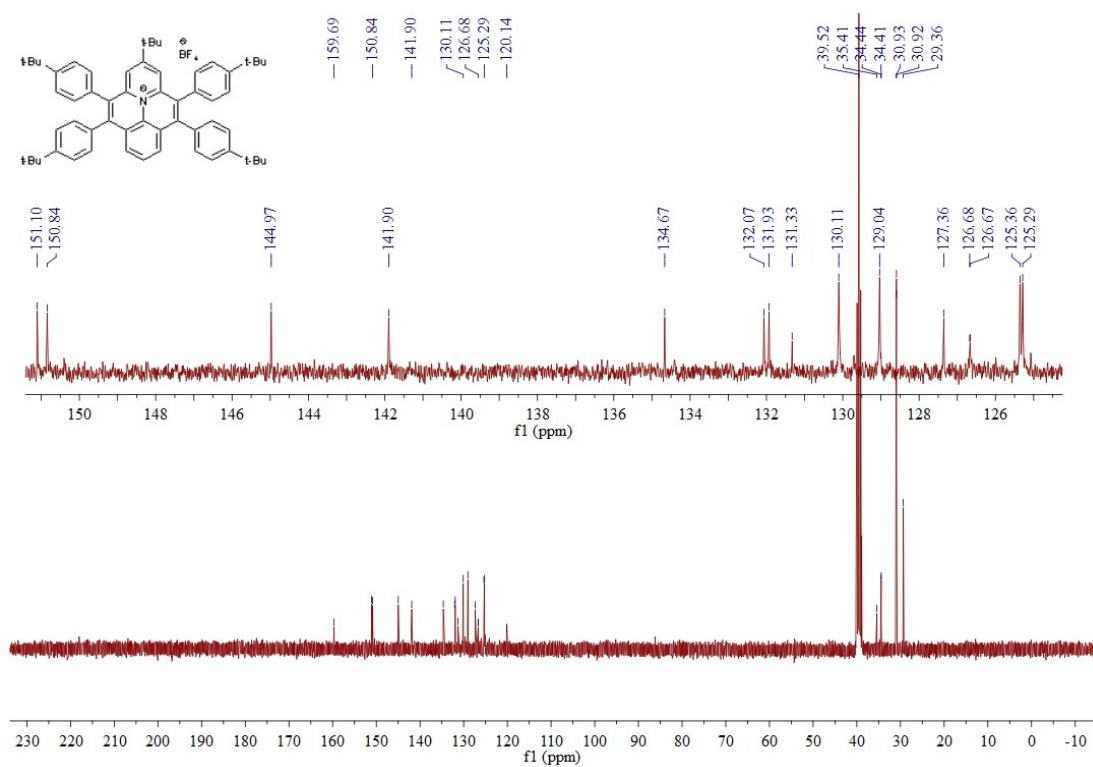

<sup>1</sup>H NMR spectra of **4f**:

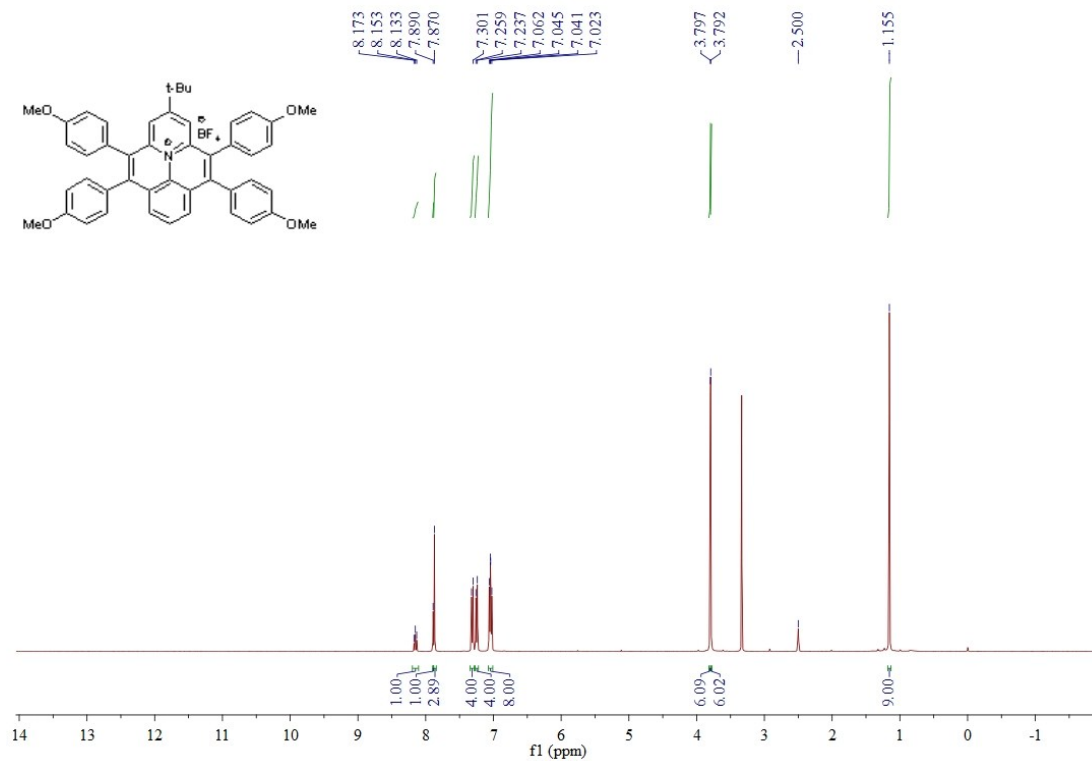

<sup>13</sup>C NMR spectra of **4f**:

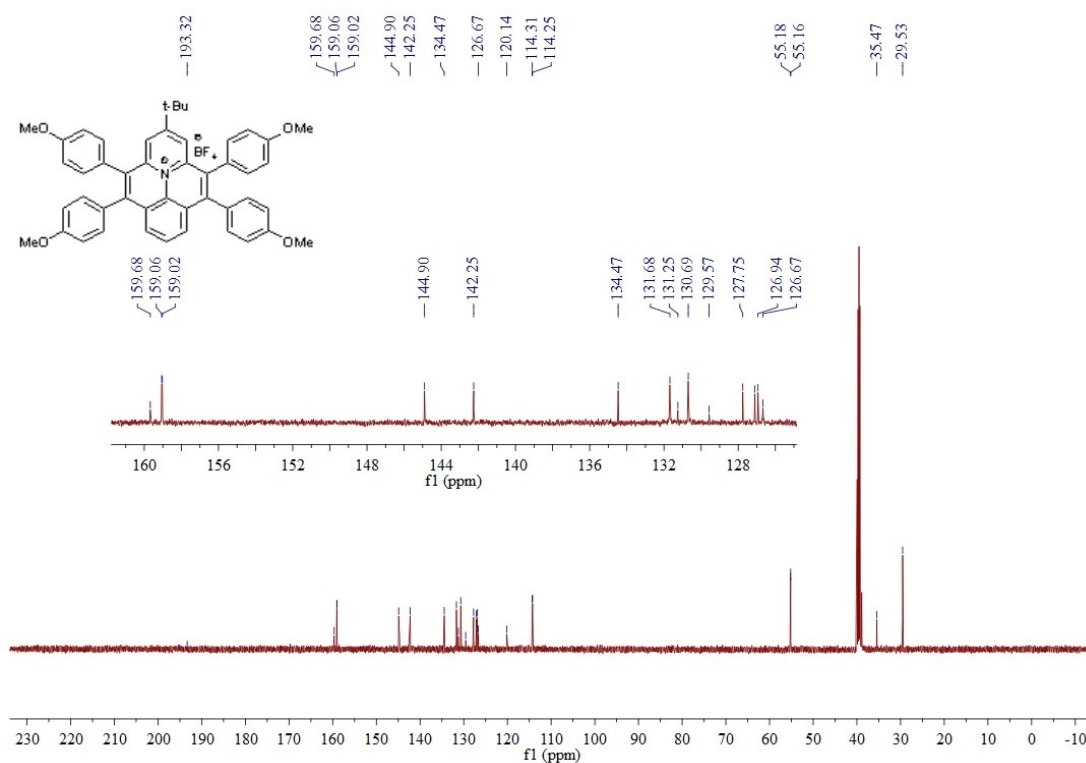

<sup>1</sup>H NMR spectra of **4g**:

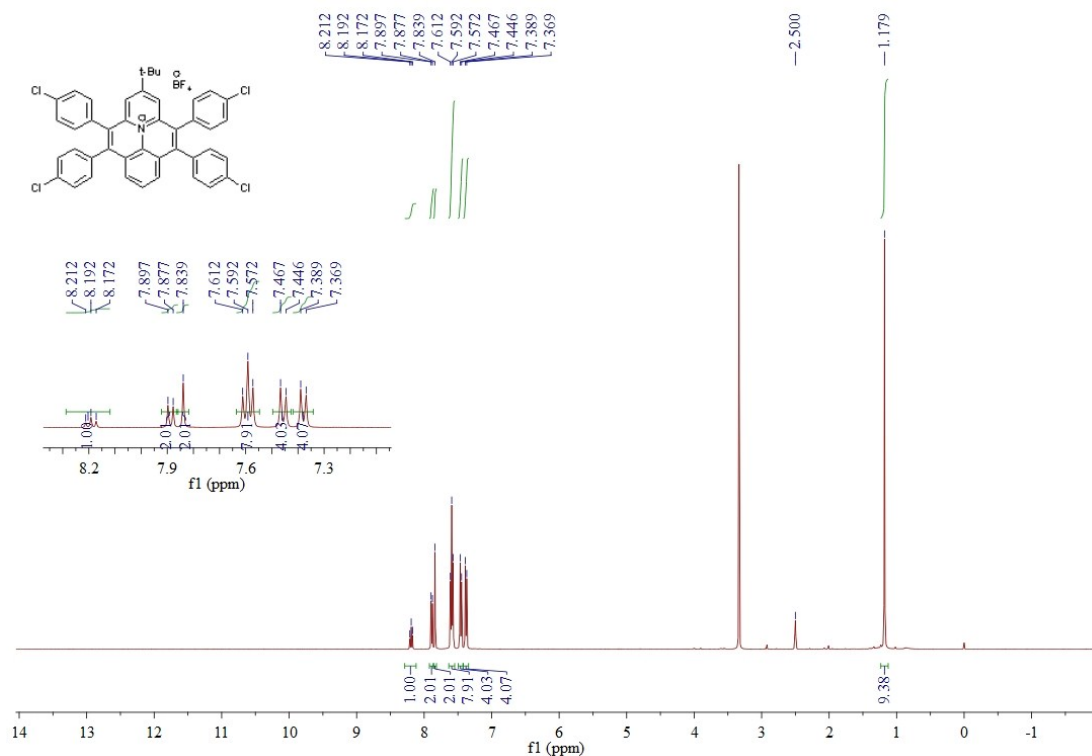

$^{13}\text{C}$  NMR spectra of **4g**:

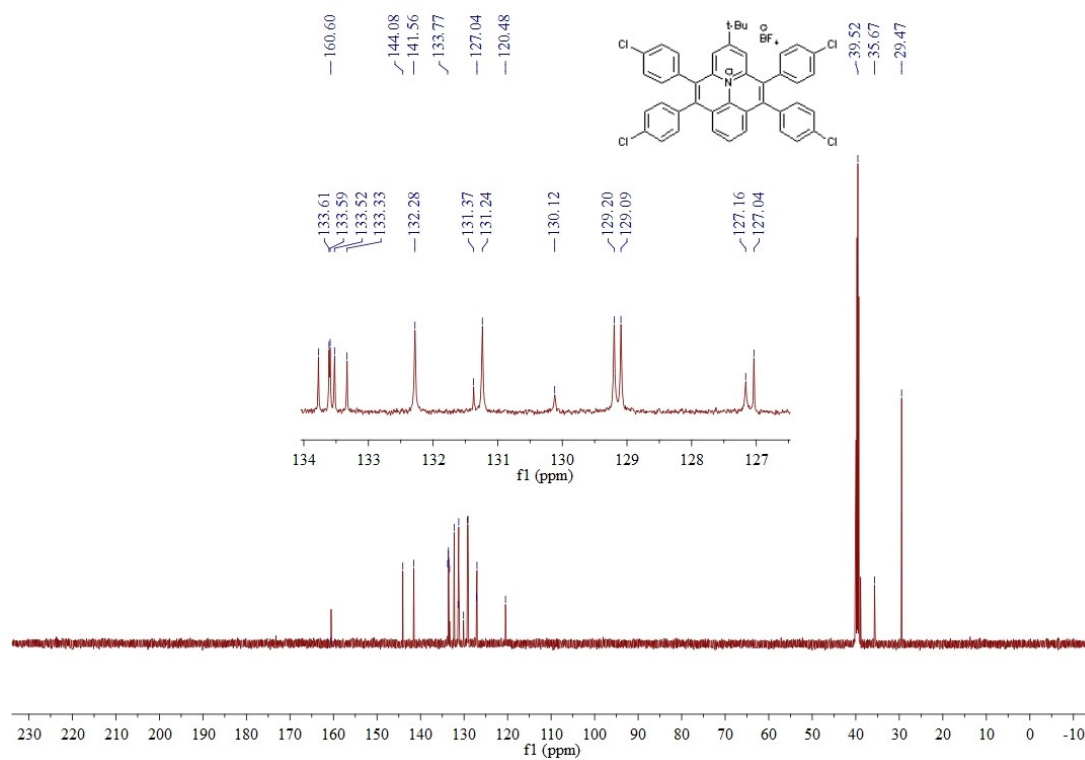

$^1\text{H}$  NMR spectra of **4h**:

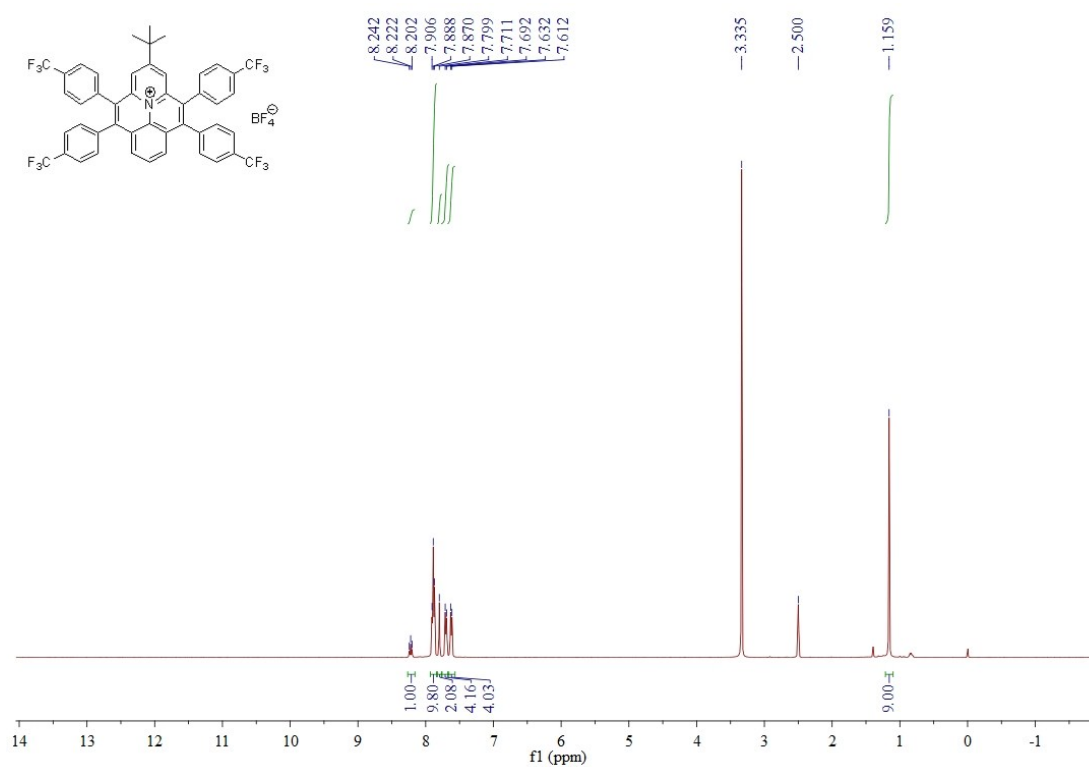

<sup>13</sup>C NMR spectra of **4h**:

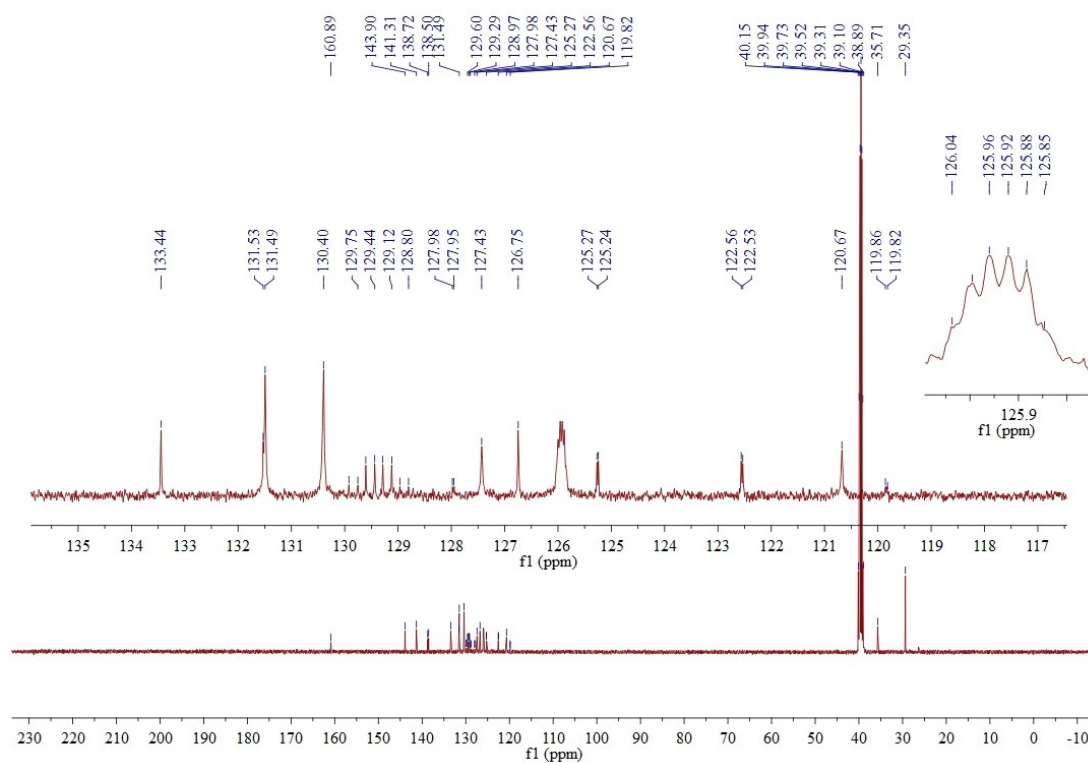

<sup>19</sup>F NMR spectra of **4h**:

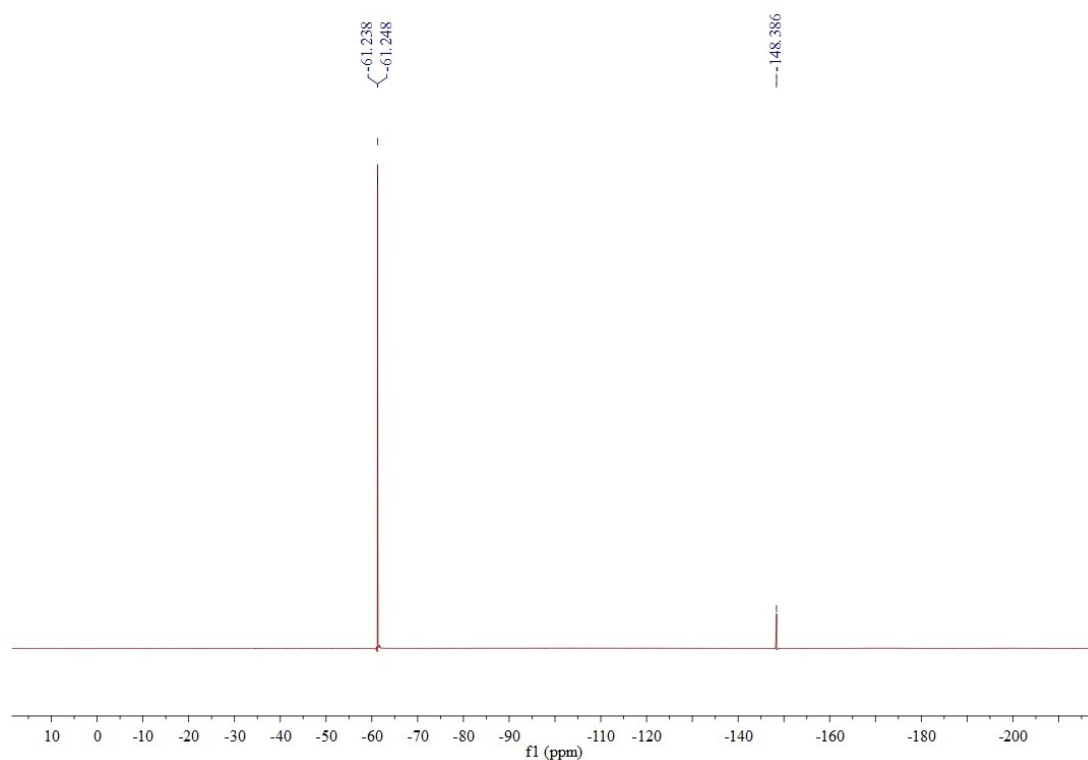

### <sup>1</sup>H NMR spectra of **4i**:

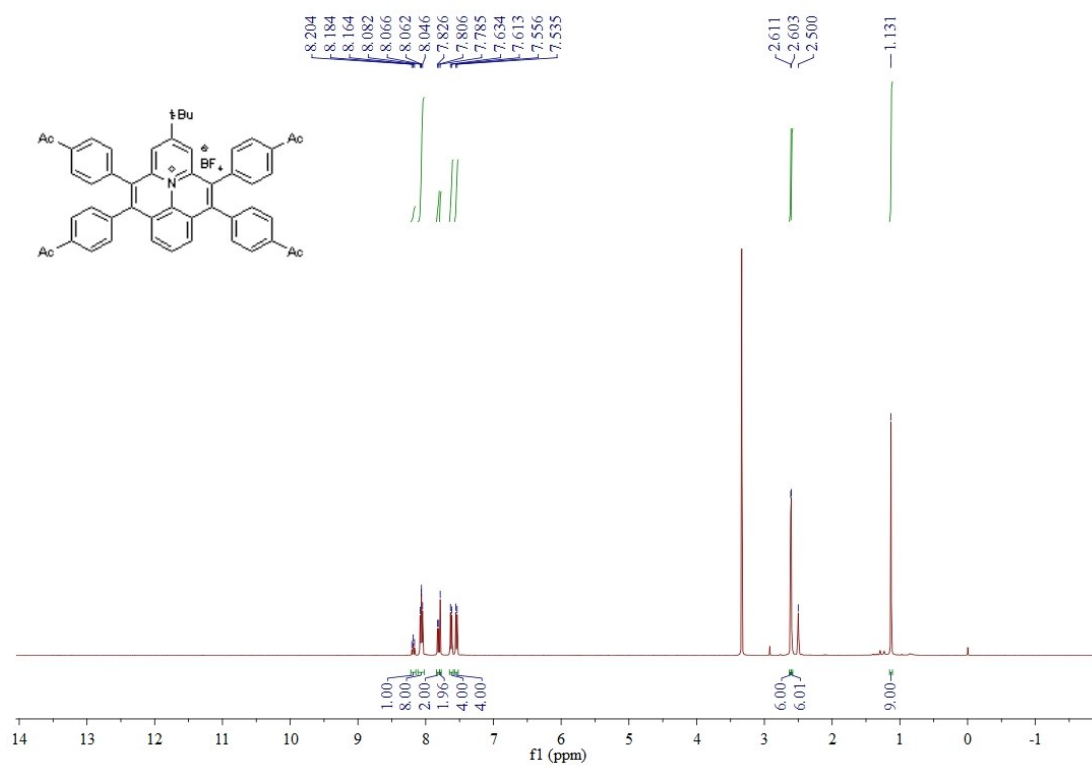

### <sup>13</sup>C NMR spectra of **4i**:

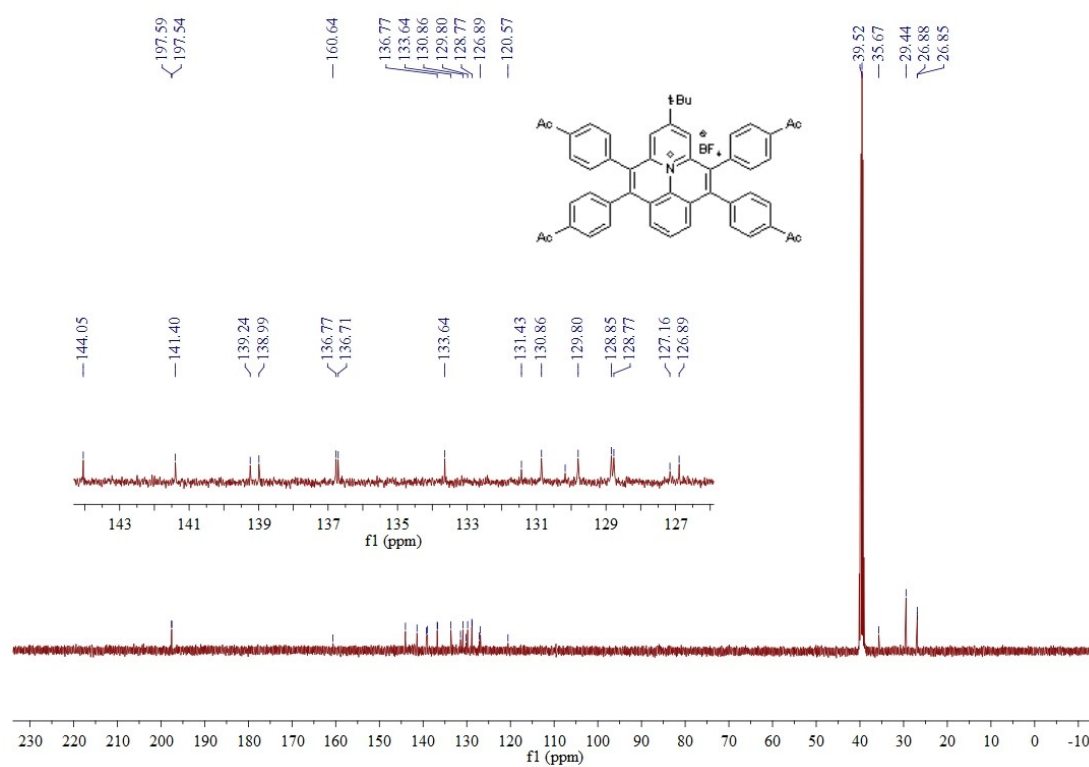



<sup>1</sup>H NMR spectra of **4j**:

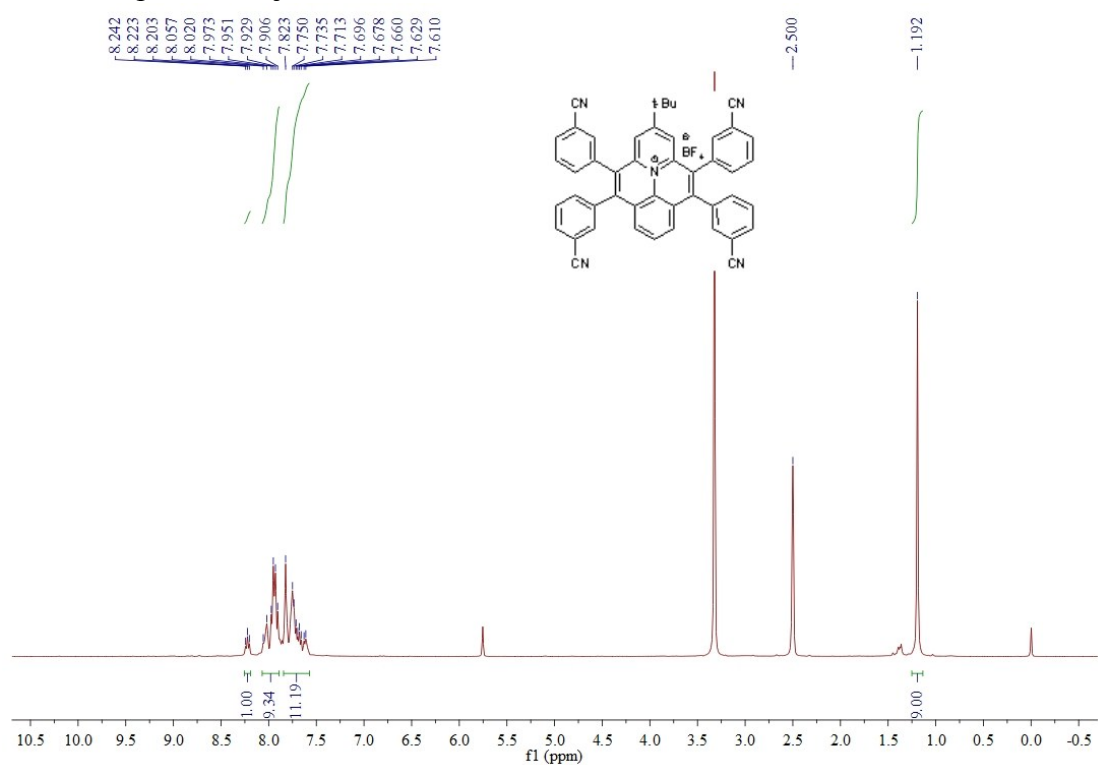

<sup>13</sup>C NMR spectra of **4j**:

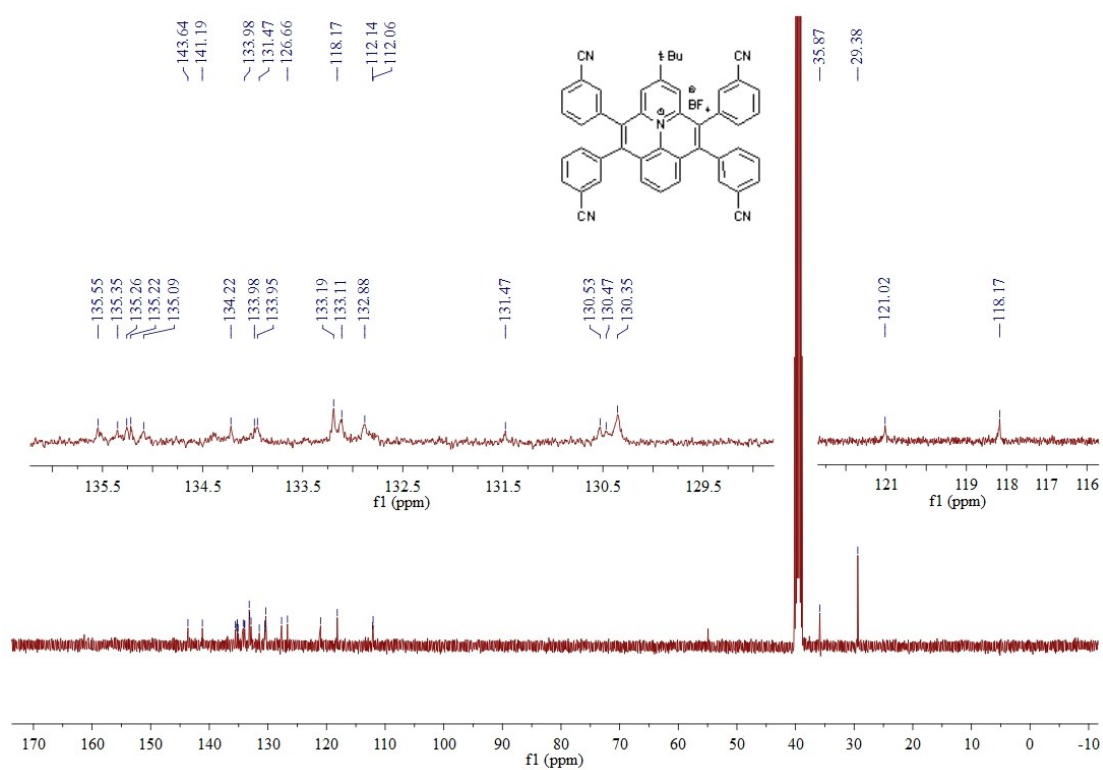

### <sup>1</sup>H NMR spectra of **4k**:

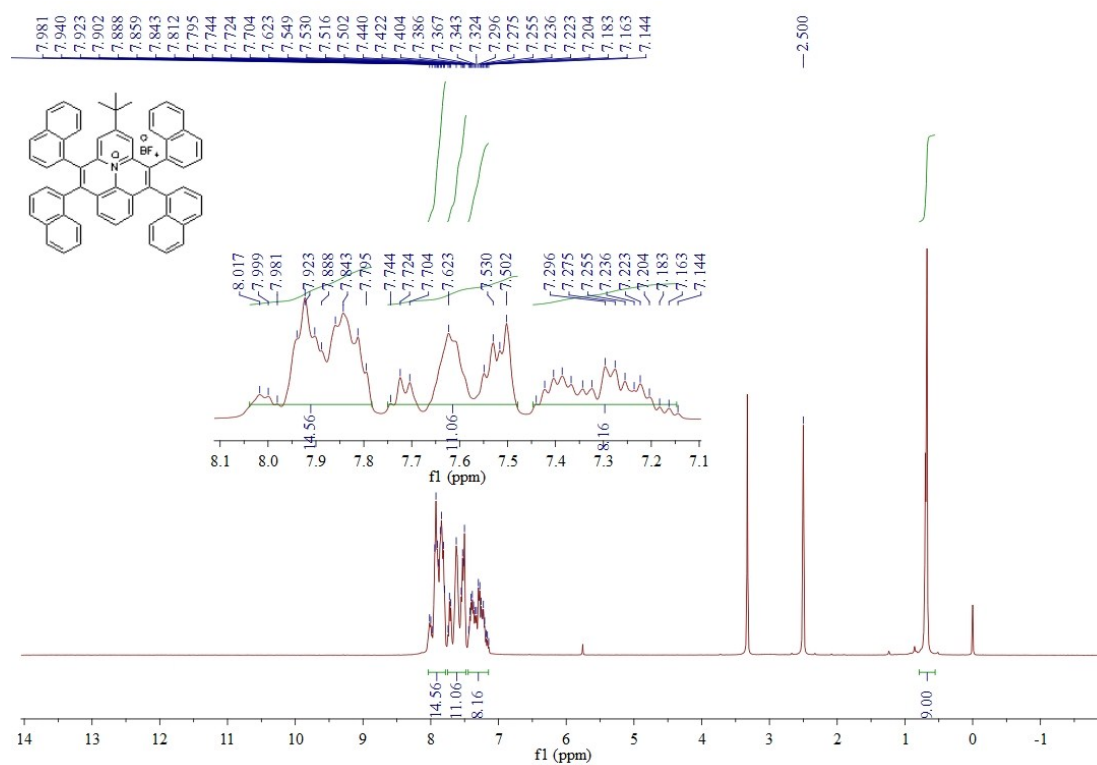

### <sup>13</sup>C NMR spectra of **4k**:

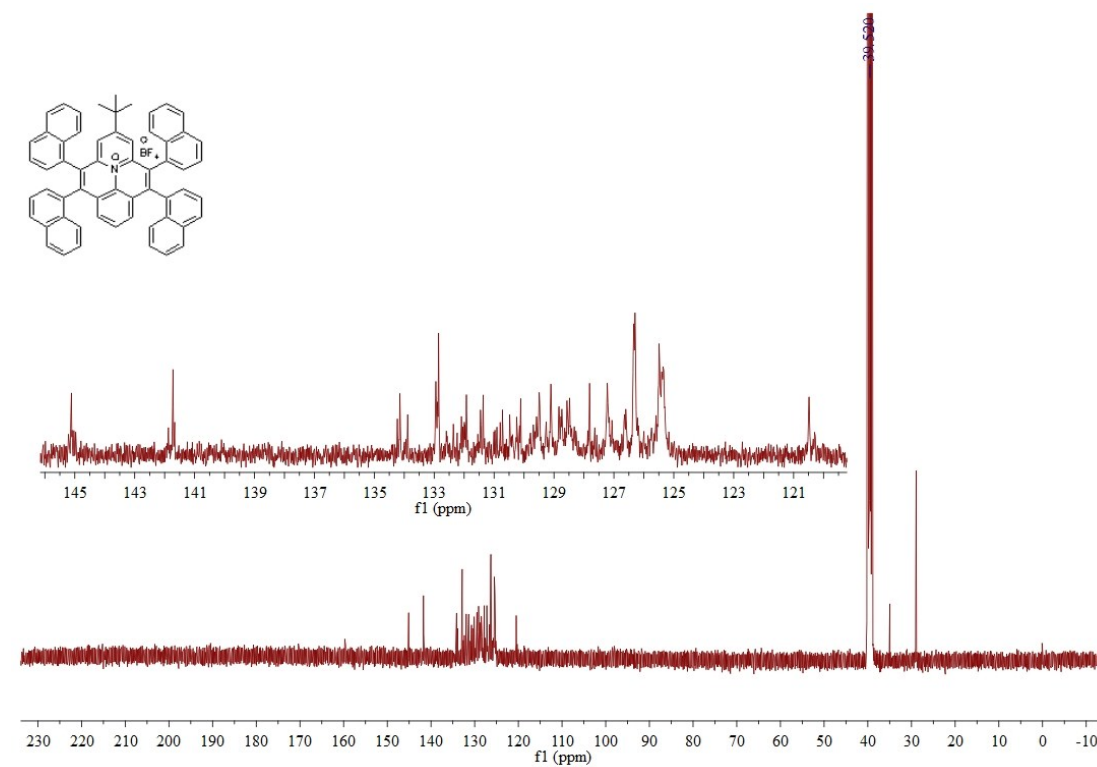

### <sup>1</sup>H NMR spectra of **4l**:

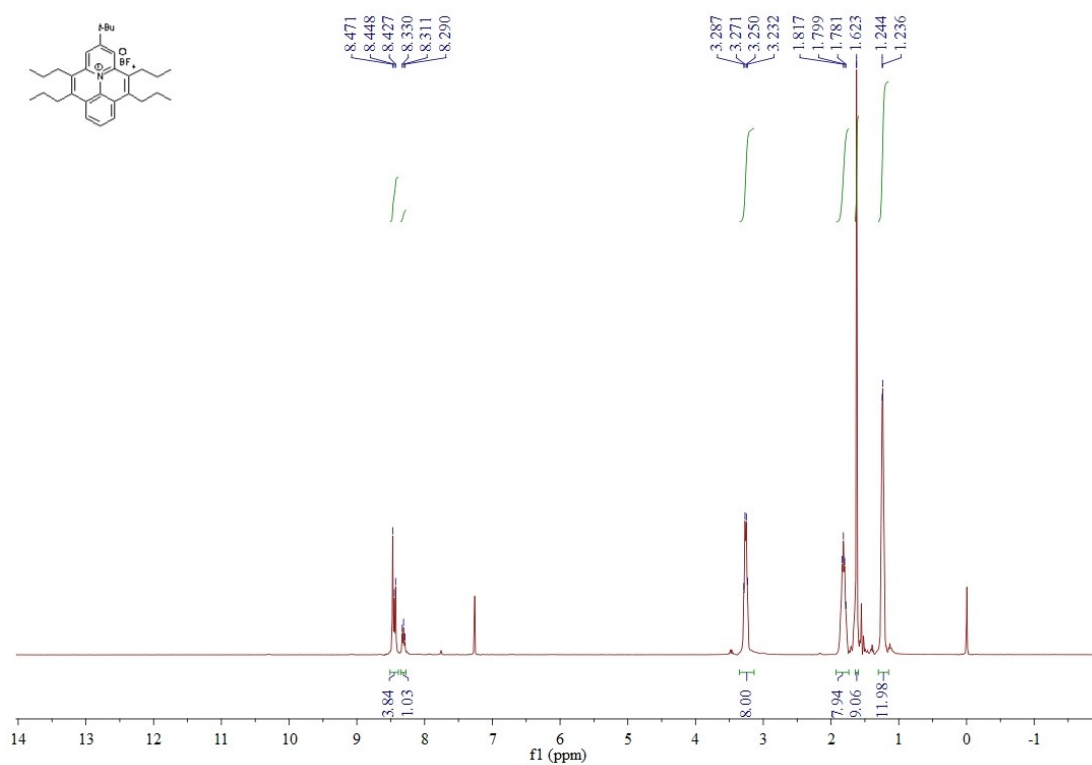

### <sup>13</sup>C NMR spectra of **4l**:

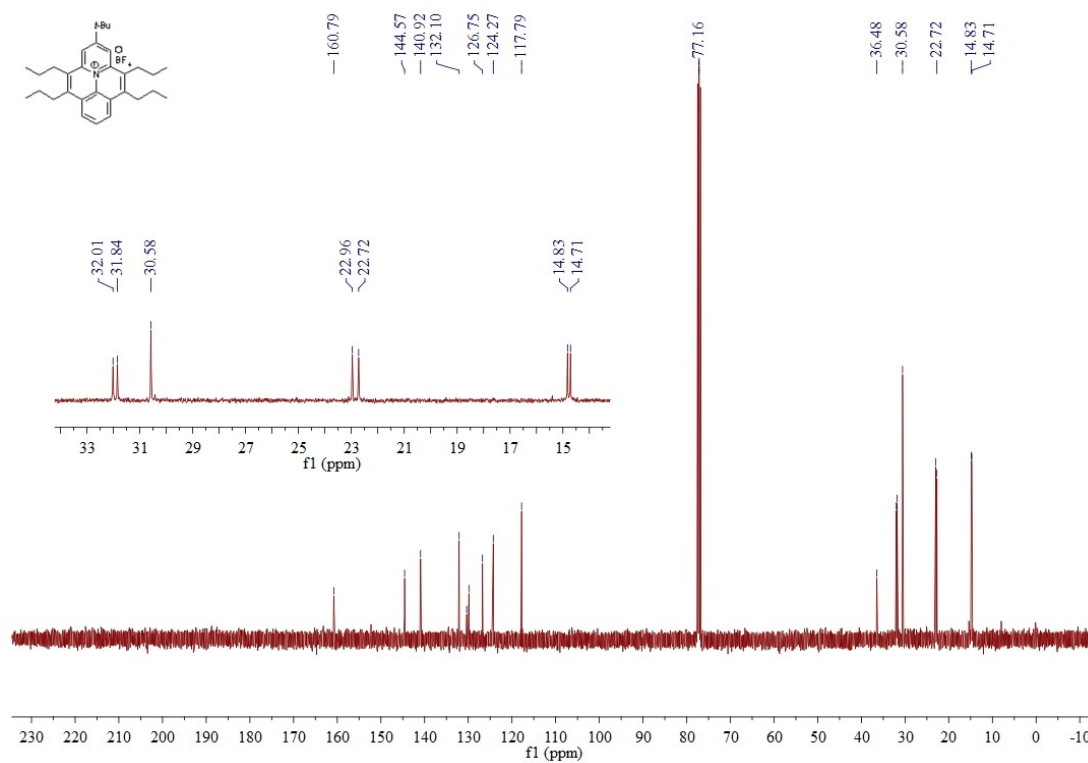

<sup>1</sup>H NMR spectra of **4m**:

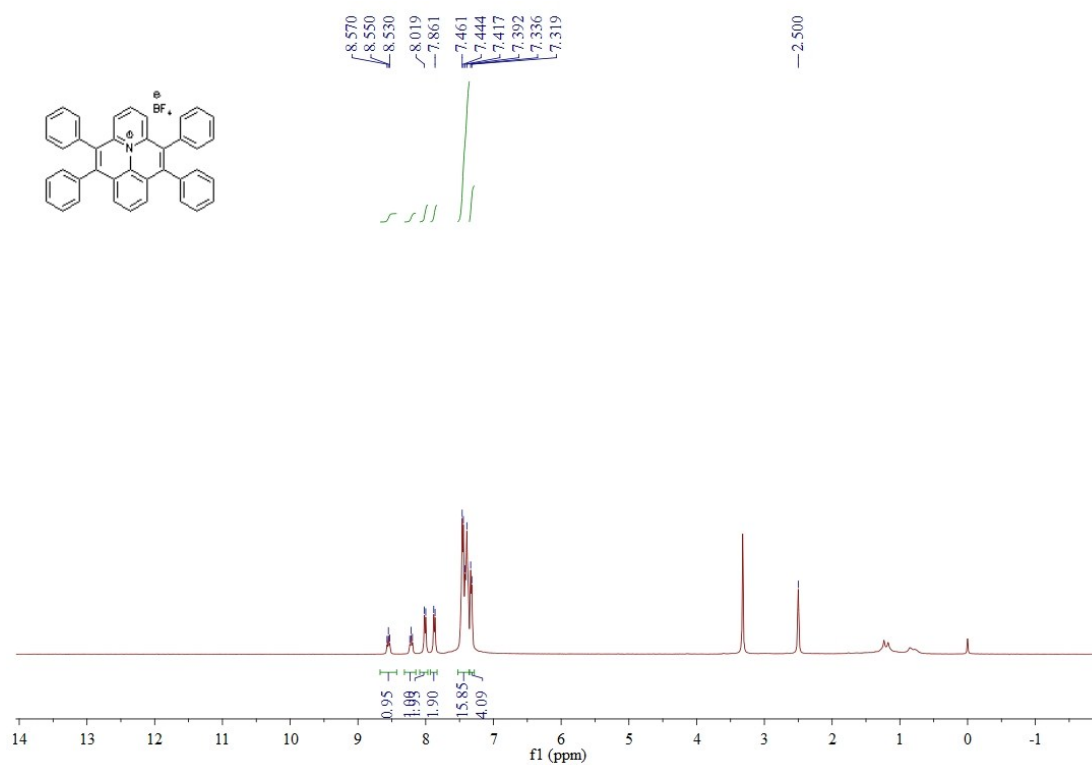

<sup>13</sup>C NMR spectra of **4m**:

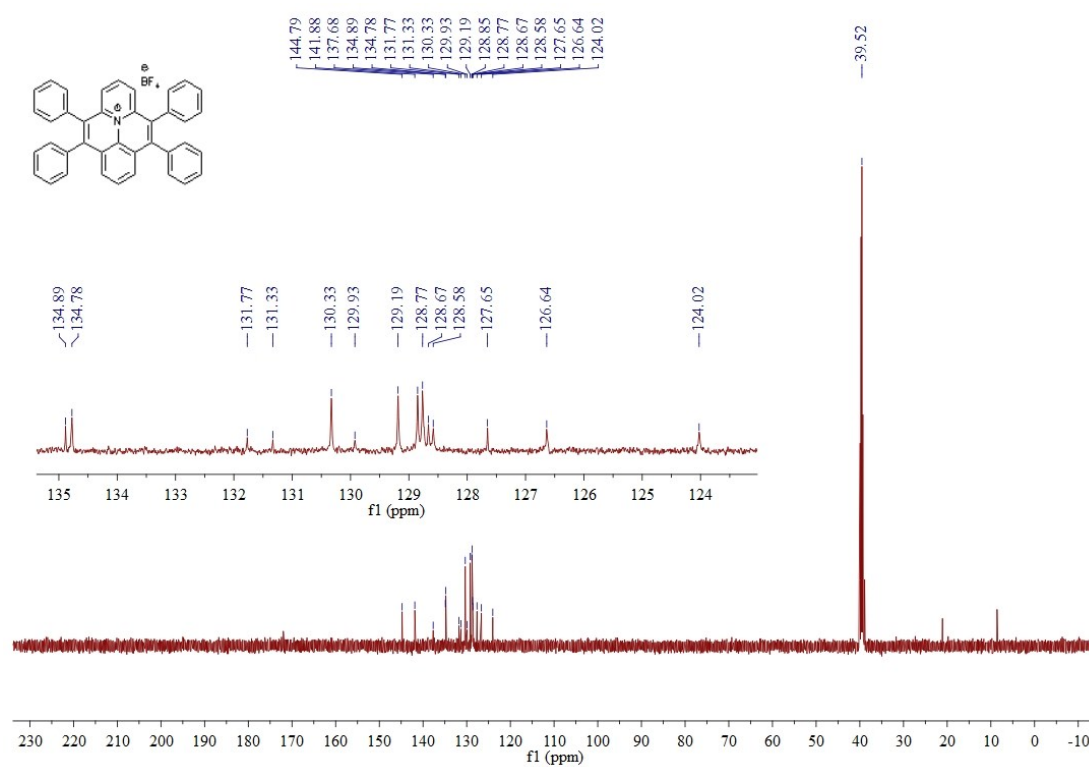

<sup>1</sup>H NMR spectra of **4n**:

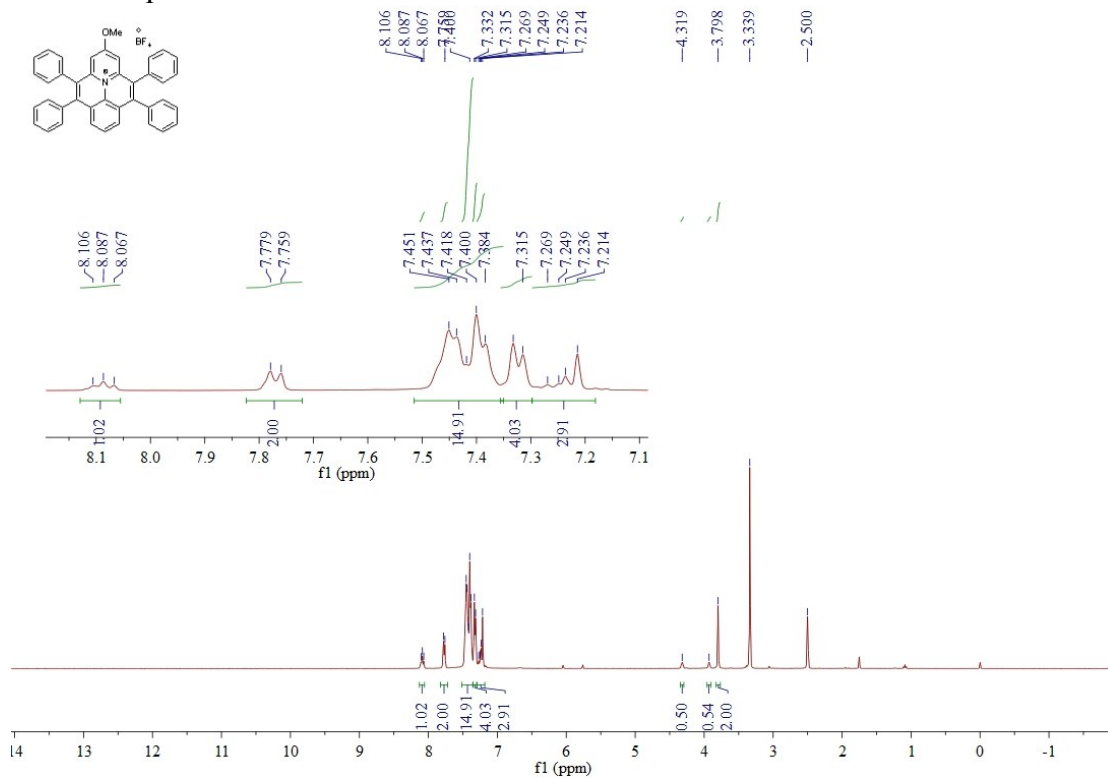

<sup>13</sup>C NMR spectra of **4n**:

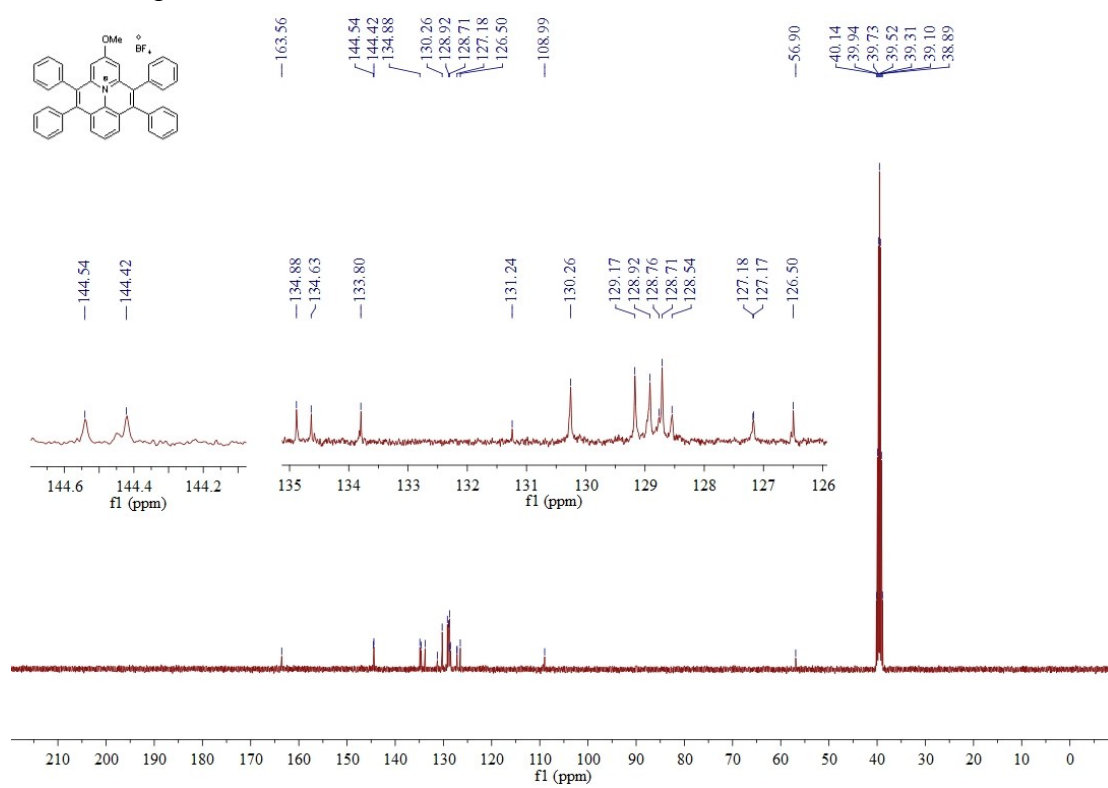

### <sup>1</sup>H NMR spectra of **4o**:

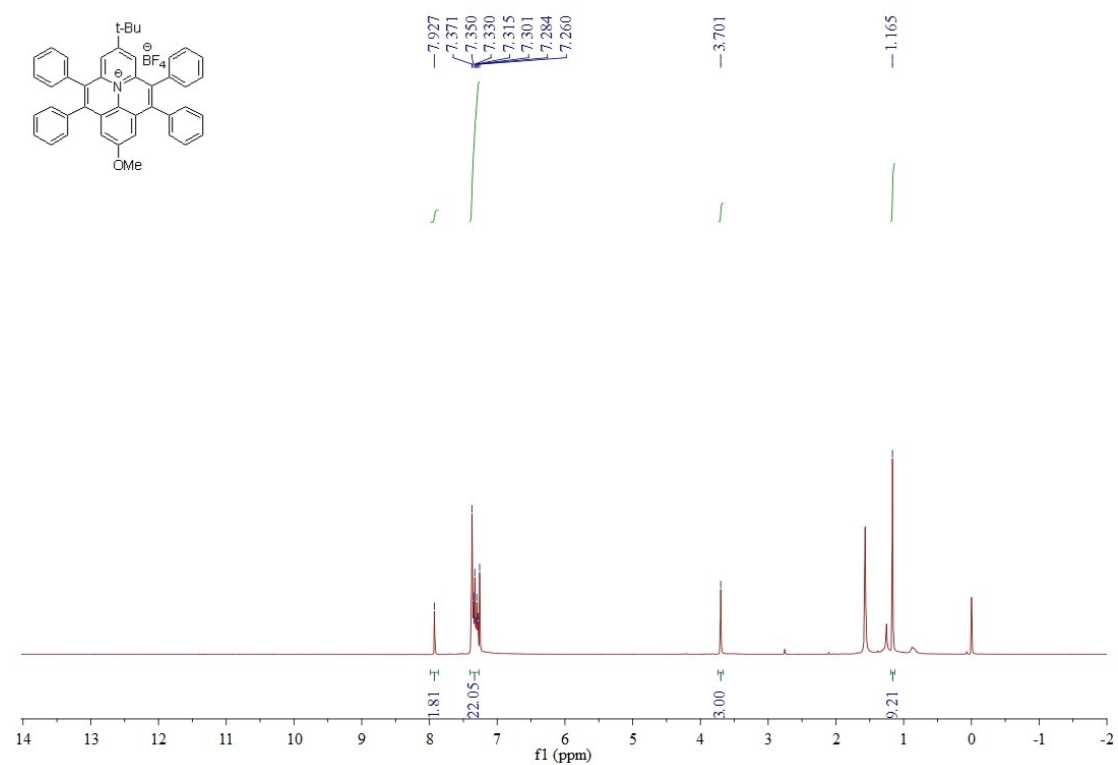

### <sup>13</sup>C NMR spectra of **4o**:

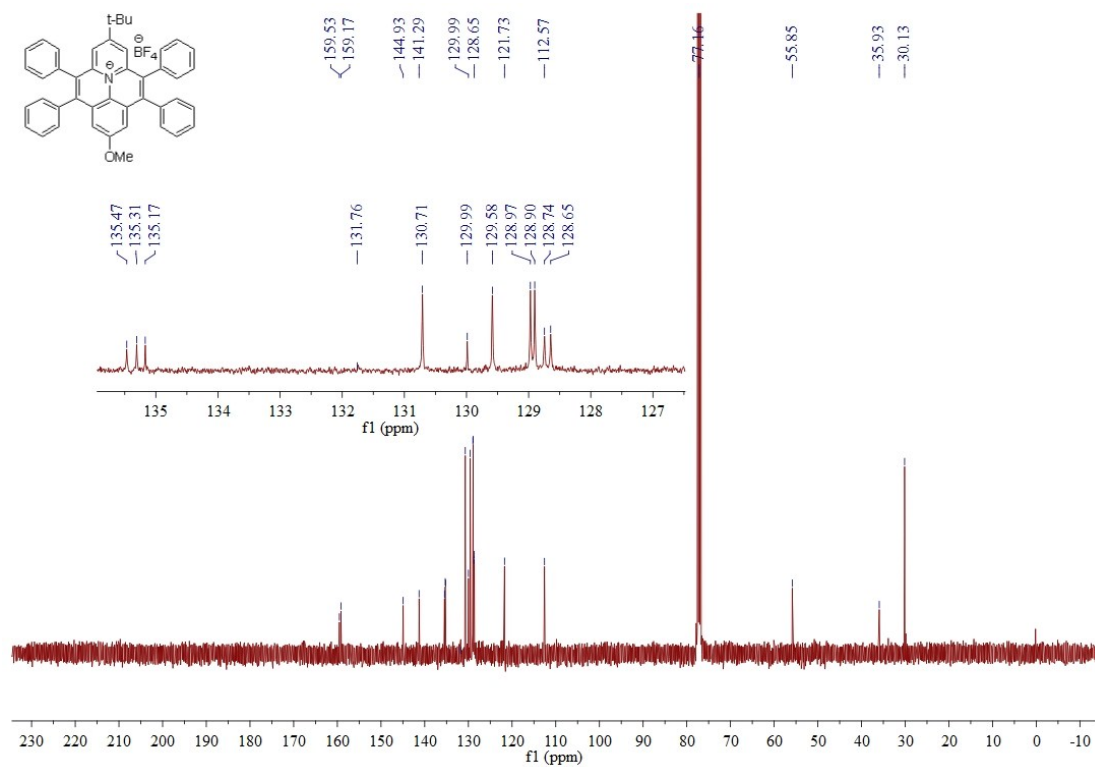

<sup>1</sup>H NMR spectra of **4p**:

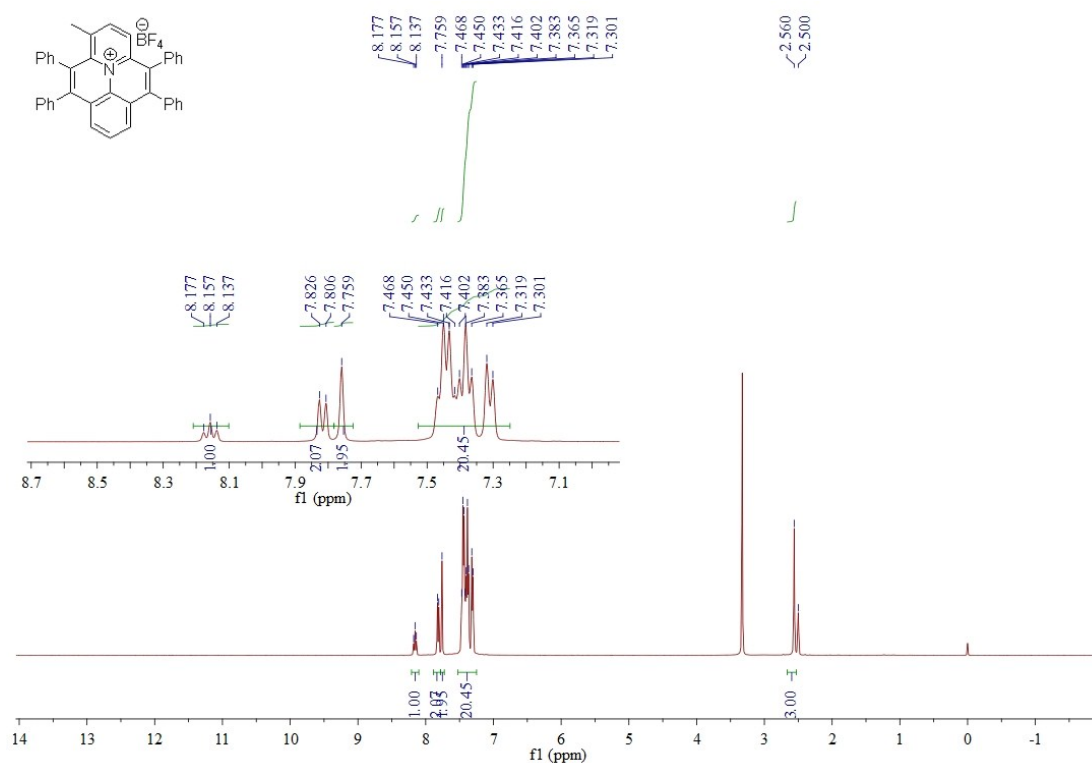

<sup>13</sup>C NMR spectra of **4p**:

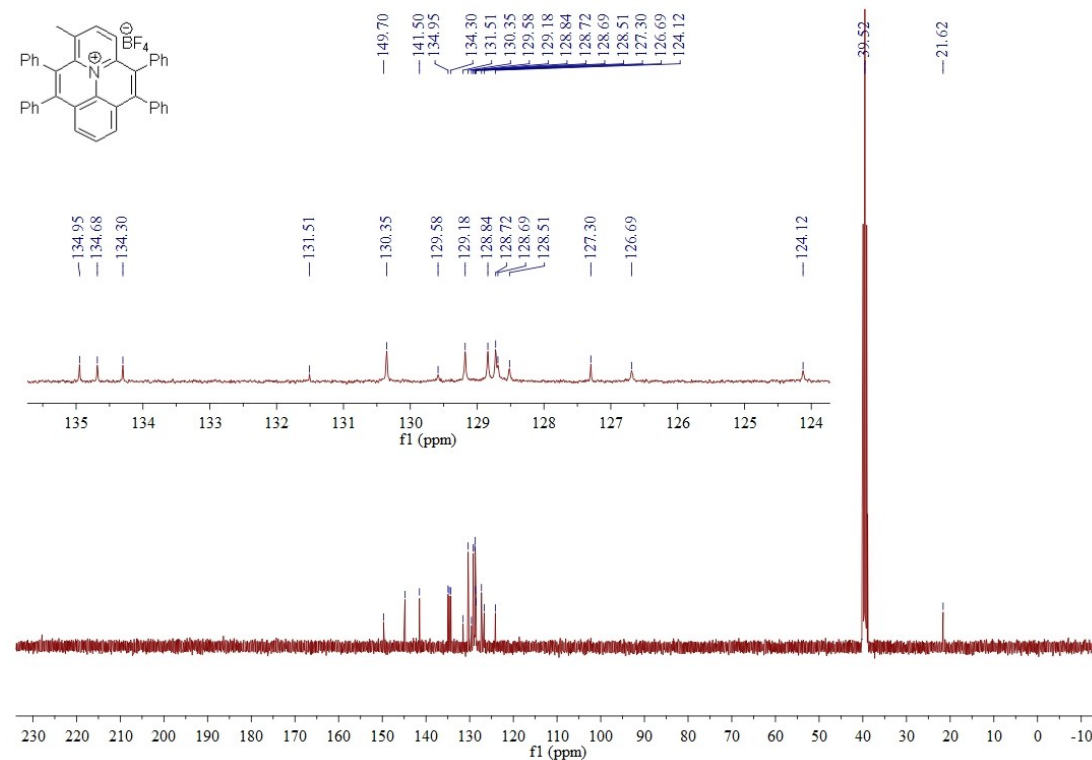

### <sup>1</sup>H NMR spectra of **4q**:

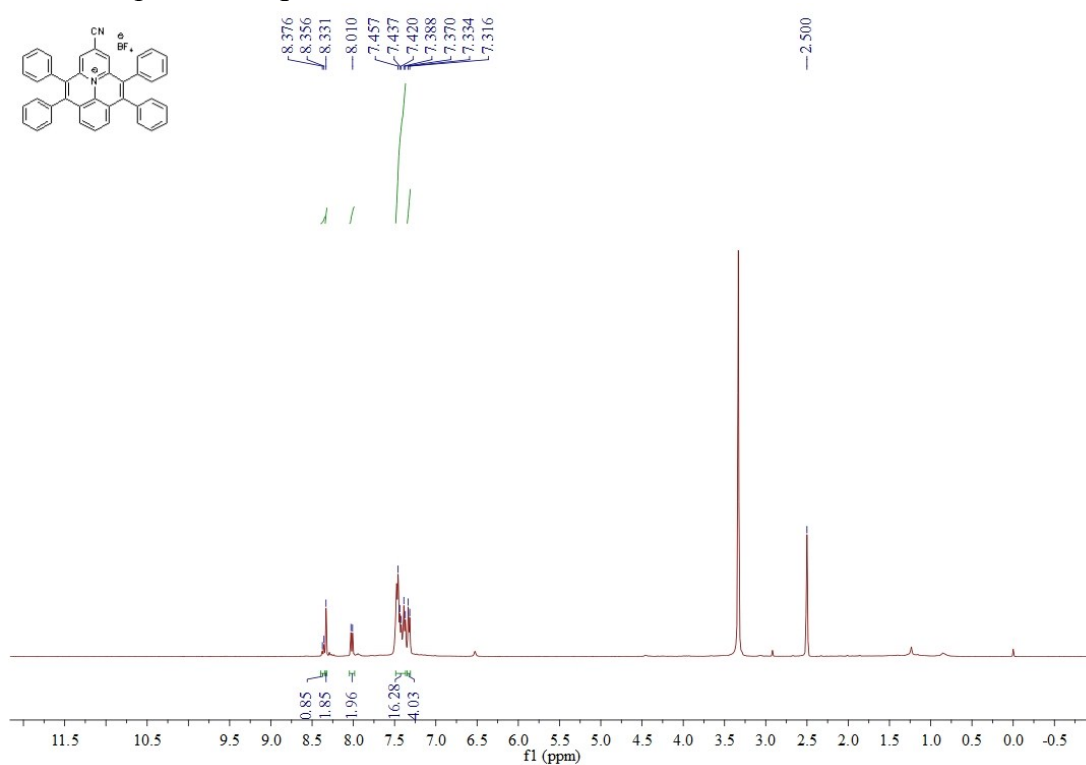

### <sup>13</sup>C NMR spectra of **4q**:

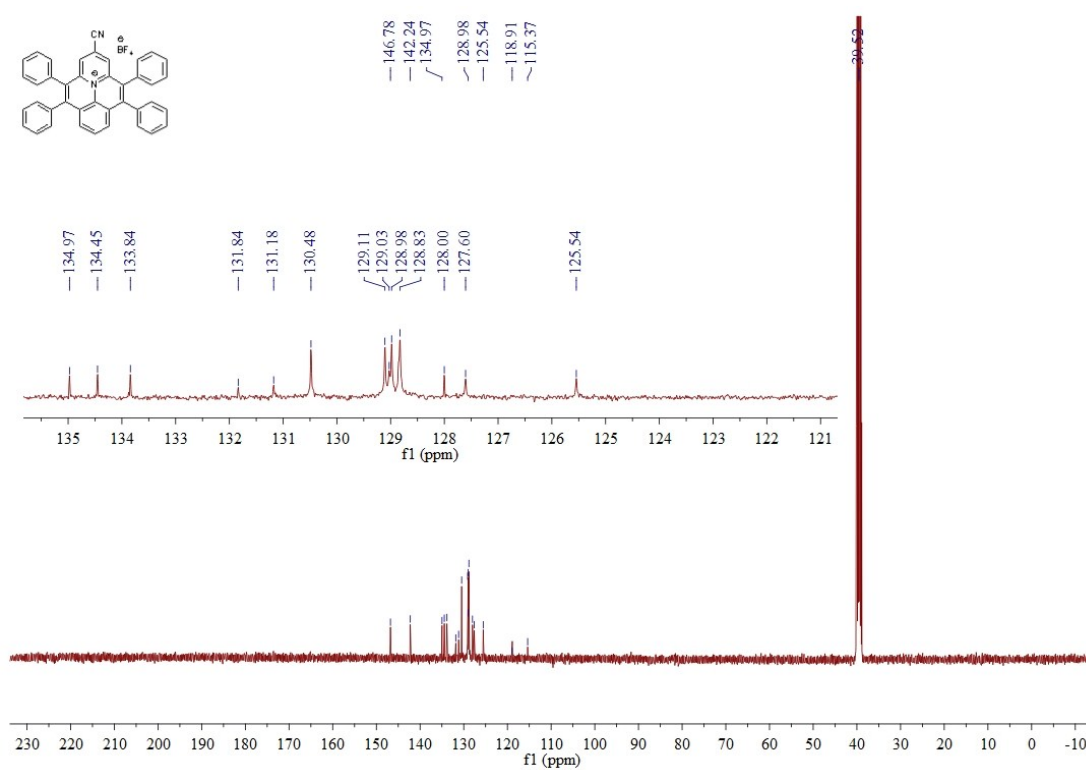



<sup>1</sup>H NMR spectra of **4r**:

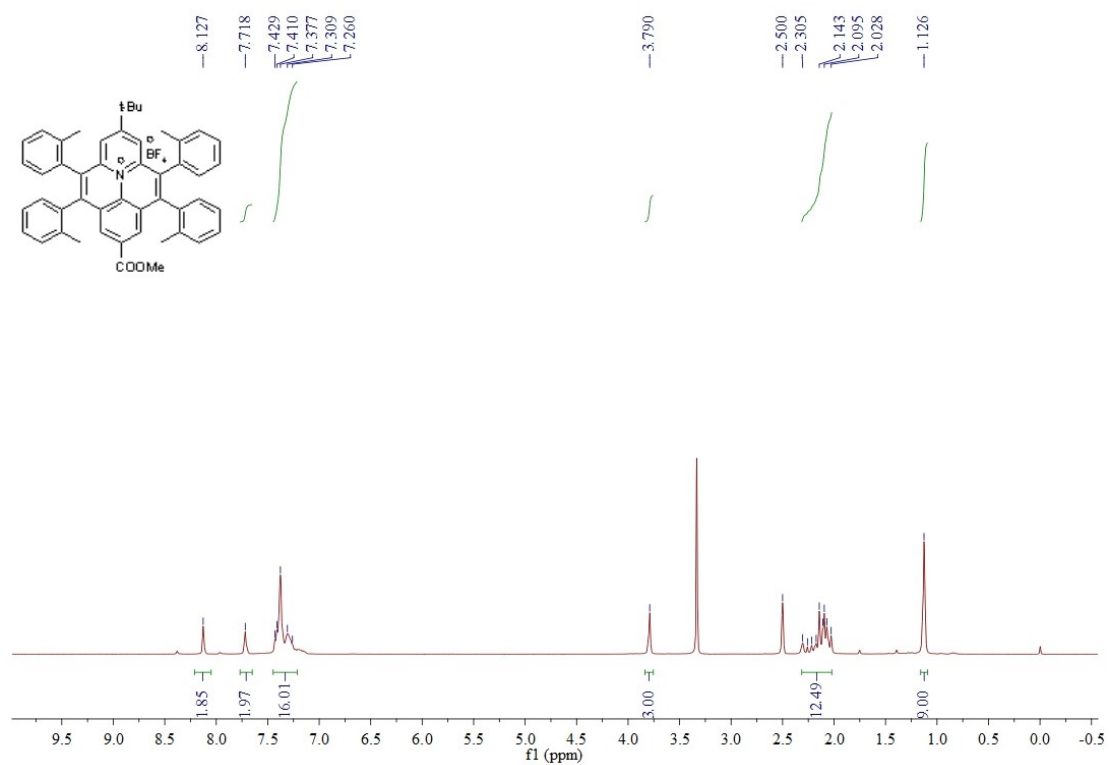

<sup>13</sup>C NMR spectra of **4r**:

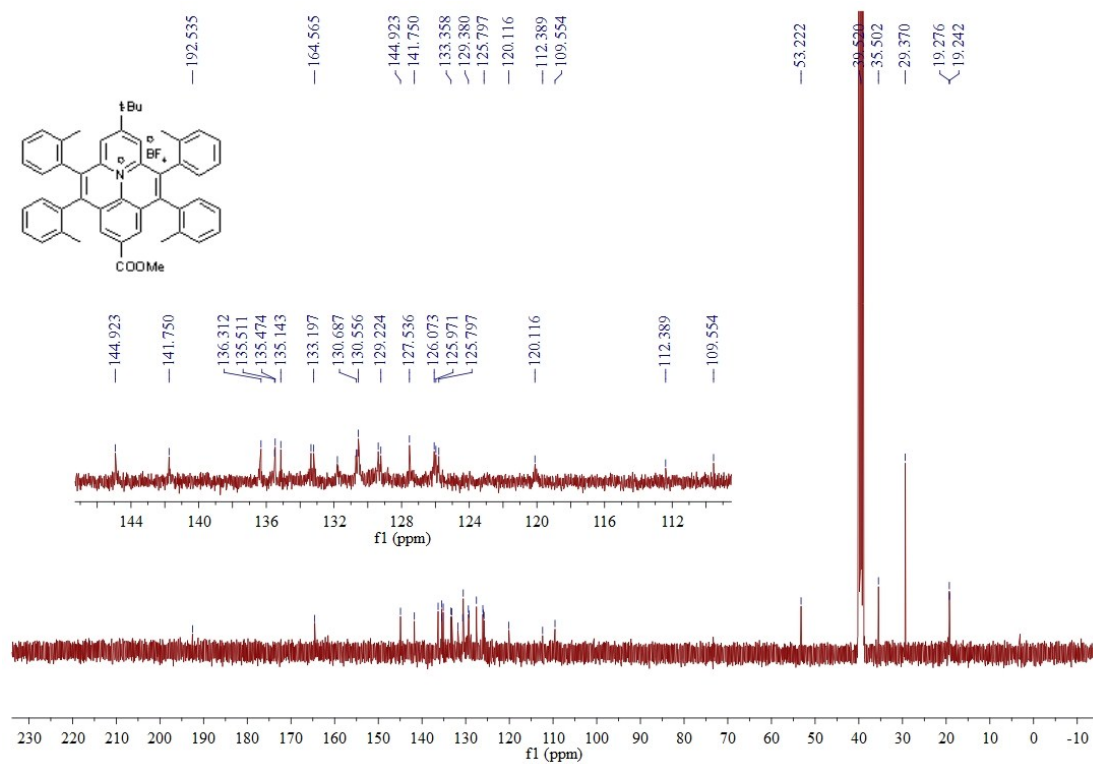

<sup>1</sup>H NMR spectra of 4s:

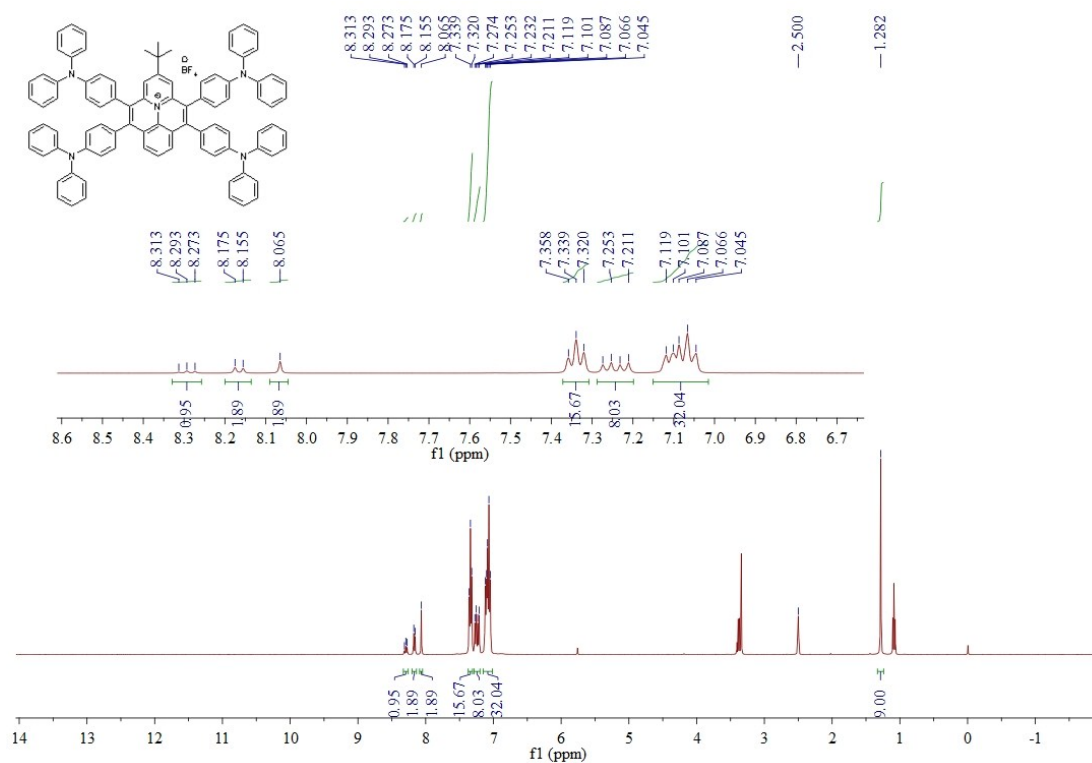

<sup>13</sup>C NMR spectra of 4s:

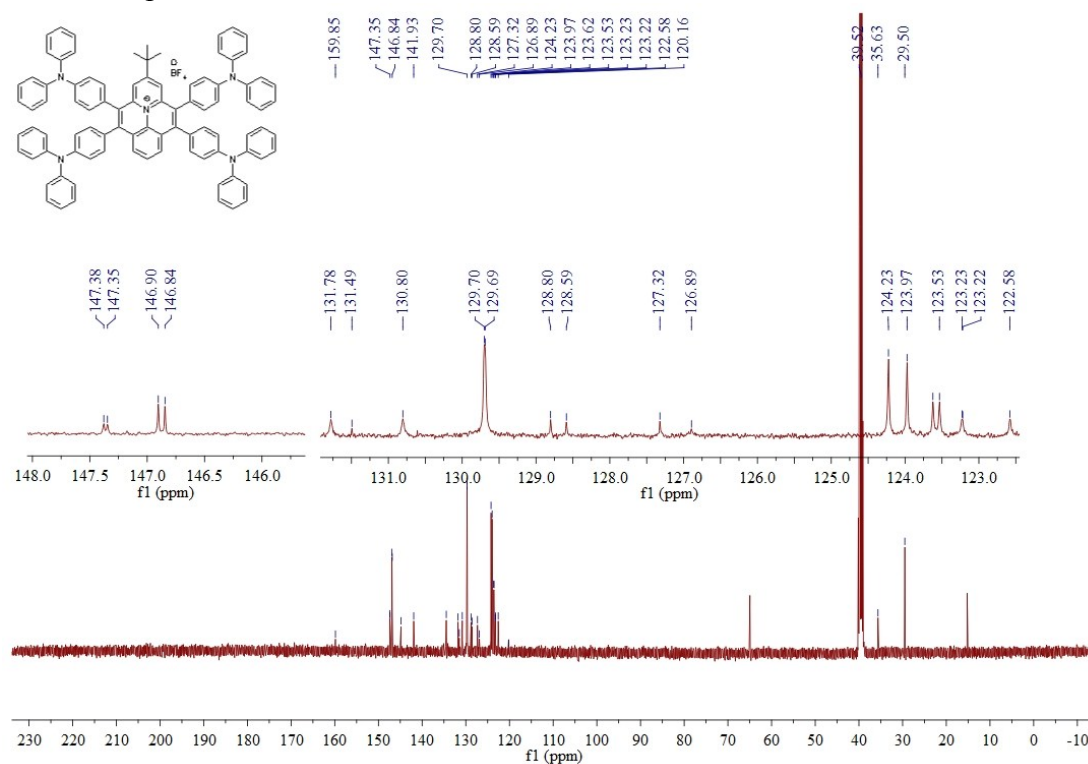

Supplement: c6ra15464f1.pdf [file c6ra15464f1.pdf]
